# Supplementary material for: New insights into mitochondrial segregation from the Doubly Uniparental Inheritance system in bivalves
Source: Springer Nature journal article supplement (doi:10.1186/s12915-025-02459-6), 2025-11-26
Supplement: MOESM2 [file 12915_2025_2459_MOESM2_ESM.pdf]

# Supplementary Figures

A

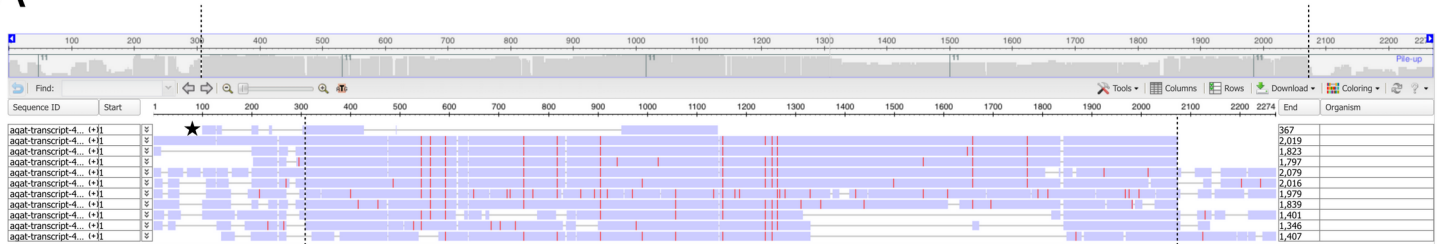

B

| Name                          | From | To   | Name             | From | To   | Class               | Dir | Sim    | Pos/Mn:Ts | Score |
|-------------------------------|------|------|------------------|------|------|---------------------|-----|--------|-----------|-------|
| MGAL_10NCA066482#DNA/KoLobokP | 1    | 766  | KolobokE-4_MyEd  | 3391 | 4071 | Interspersed_Repeat | d   | 0.9334 | 2.3571    | 1556  |
| MGAL_10NCA066482#DNA/KoLobokP | 767  | 1124 | Kolobok0-11_MyEd | 6629 | 6985 | Interspersed_Repeat | d   | 0.8743 | 2.3889    | 772   |
| MGAL_10NCA066482#DNA/KoLobokP | 1127 | 1819 | Kolobok0-11_MyEd | 2744 | 3482 | Interspersed_Repeat | d   | 0.9841 | 2.8455    | 1486  |

C

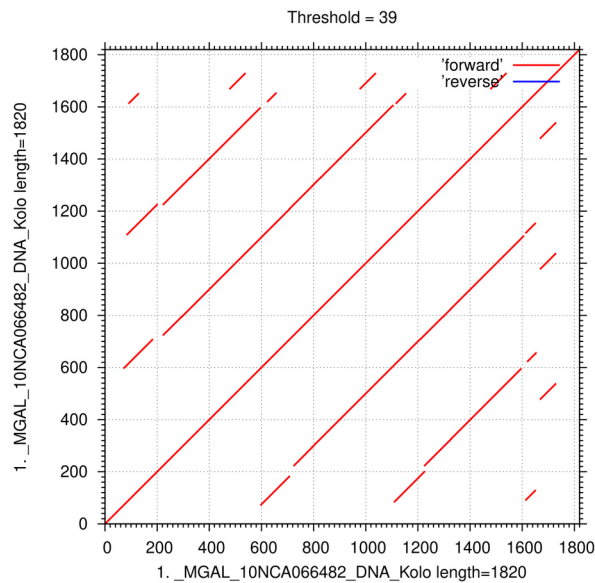

**Supplementary Figure 1. Example of the origination of a lncRNA (MGAL\_10NCA066482) from a putative Kolobok transposable element. A:** Alignment of the lncRNA MGAL\_10NCA066482 with 9 other genomic hits and their flanking regions. Dotted lines indicate the boundaries of the element characterized by a drastic decrease in coverage and alignment identity. The star highlights the original transcript. **B:** CENSOR results of the reconstructed consensus sequences. **C:** Self-alignment of the consensus sequence reveals a tandem-like structure.

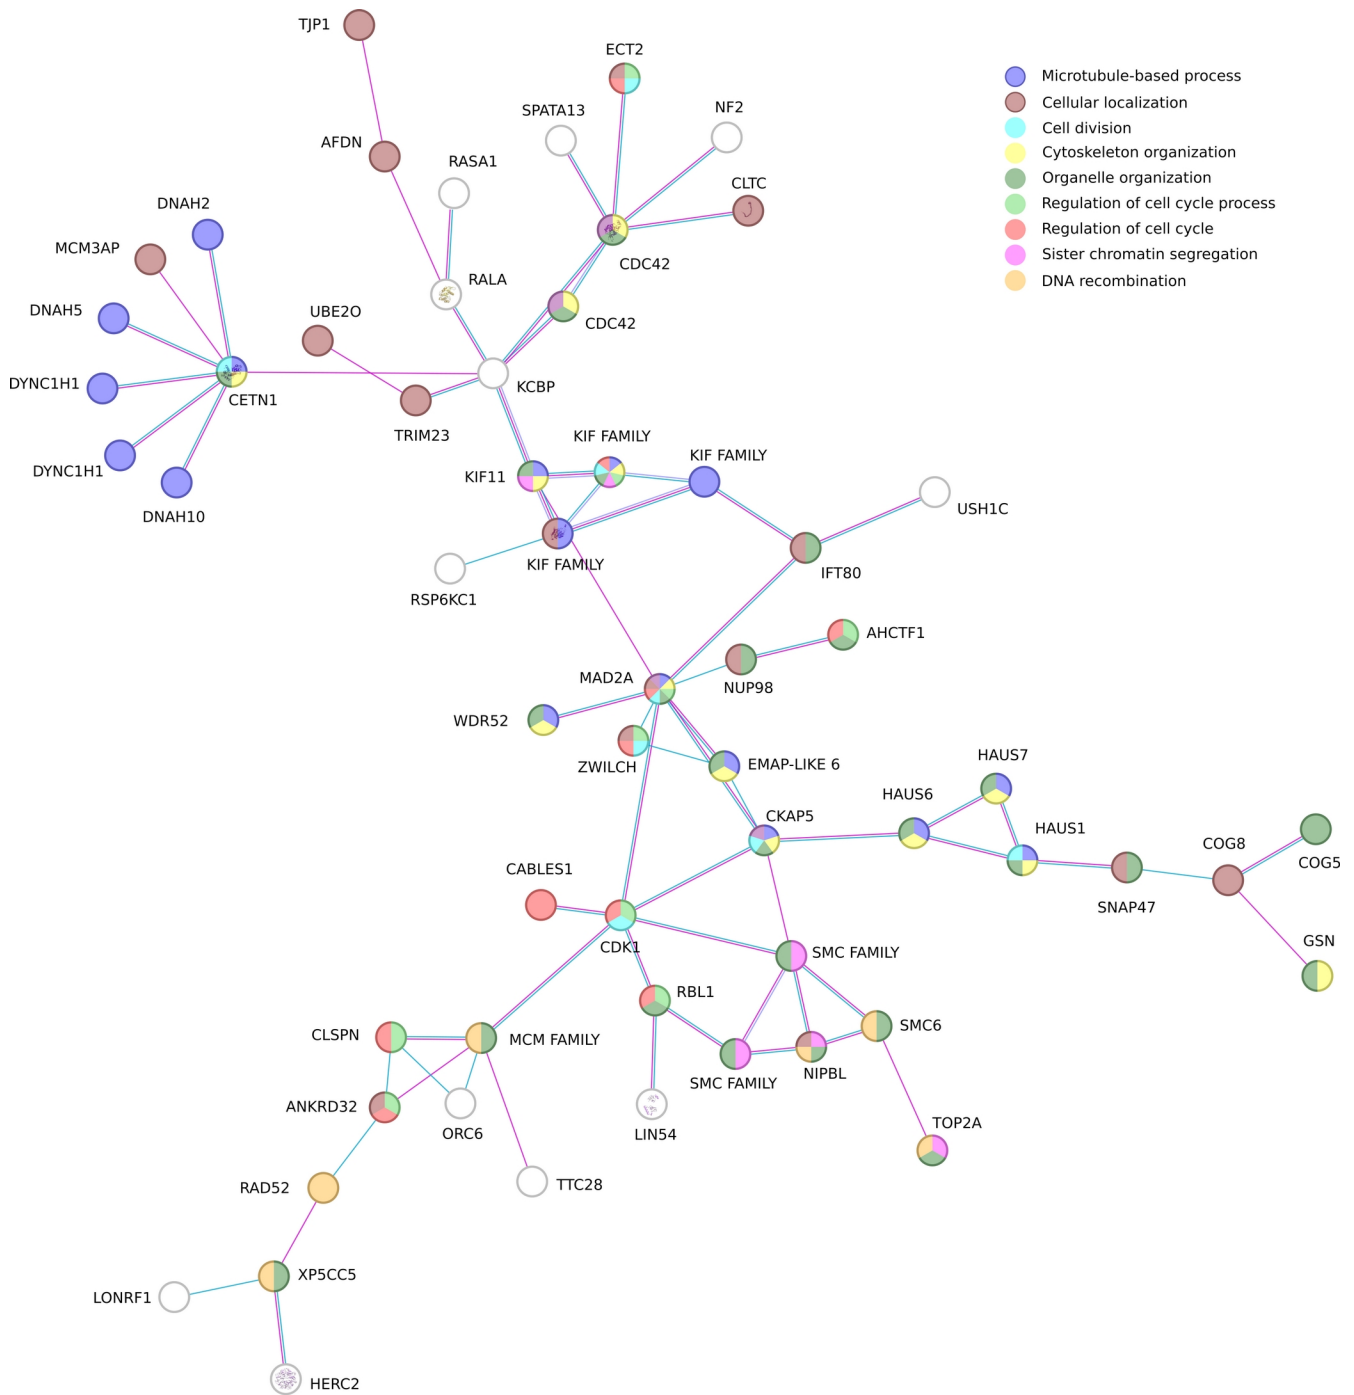

**Supplementary Figure 2. Functional annotation of the protein-protein interaction subnetwork discussed in the manuscript.** The figure depicts the subnetwork with the highest number of PPIs (same as Figure 4 of the main text): nodes represent proteins, edges represent PPIs. Colors indicate functional annotations retrieved from STRING (see legend).

**A**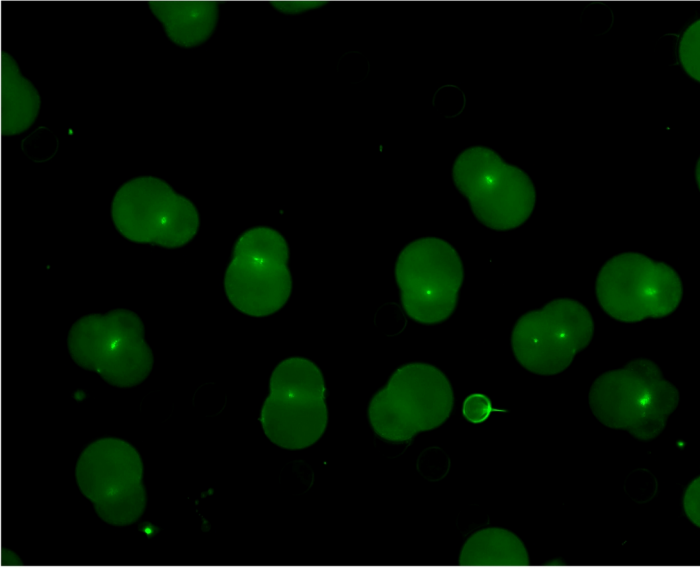**B**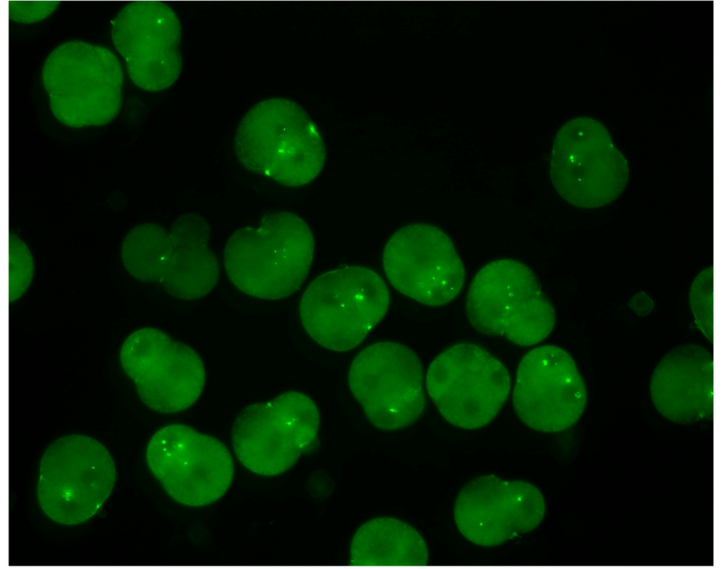

**Supplementary Figure 3. Early stage embryos from differently biased samples.** Images captured with Zeiss Apotome Microscope (Carl Zeiss AG, Oberkochen, Germany). Sperm were tagged with MitoTracker Green prior to fertilization (green in images). **A:** example of progeny of a male-biased sample; nearly all embryos captured show the aggregate pattern of paternal mitochondria localized at the cleavage furrow of the first cell division. **B:** example of progeny of a female-biased sample; in nearly all embryos paternal mitochondria are randomly scattered through blastomeres.
