# Supplementary material for: New insights into mitochondrial segregation from the Doubly Uniparental Inheritance system in bivalves
Source: BMC Biol. 2025 Nov 26;23:371. doi: 10.1186/s12915-025-02459-6 (PMC12750733; doi:10.1186/s12915-025-02459-6)
Supplement: Supplementary file 1 — Additional file 1: Supplementary Tables 1-20. TabS1 - Percentage of female and male developing embryos from each egg sample. TabS2 – Quantification of rRNA-depleted extraction for each sample. TabS3 – Sequencing and mapping results. TabS4 – Expression quantification for each feature in each sample. TabS5 – Differential expression between female- and male-biased samples. TabS6 – GO term enrichment in DE PCGs. TabS7 – annotation of DE PCGs. TabS8 – Network metrics of STRING-inferred PPIs across DE PCGs. TabS9 – LncRNAs annotation and analyses. TabS10 – Evolutionary analyses Dataset. TabS11– Statistics of OrthoGroup assignments. TabS12 – Results of TRACCER analyses. TabS13 – Results of CODEML analyses. TabS14 – Results of Evolutionary Rate Covariation with mitochondrial genes. TabS15 – Statistical test for overrepresentation of genes covarying with mitochondrial genes among CE PCGs. TabS16 – GO term enrichment in CE PCGs. TabS17– Network metrics of STRING-inferred PPIs across CE PCGs. TabS18 – Network metrics of STRING-inferred PPIs across CE and DE PCGs combined. TabS19 - Cluster association for each genes showing protein-protein interactions in network of DE genes and CE genes. TabS20 - Network metrics of the largest PPI subnetwork. TabS21 – GO term enrichment for components of the subnetworks (DE and CE genes separately). TabS22 - Kolmogorov–Smirnov tests evaluating the differential contributions of DE and CE to network metrics distributions. [file 12915_2025_2459_MOESM1_ESM.xlsx]

## Sheet: Suppl. Table 1
Supplementary Table 1: Percentage of female and male developing embryos from each egg sample. Eggs that after fertilization produced >= 70% of females were considered as female-biased eggs and are highlighted in pink. Eggs that after fertilization produced produced >=70% of males were considered as male-biased eggs and are highlighted in blue. Last column indicates the number of unfertilized eggs…
Sample	Sample name for DE analysis	% Female developing embryos	% Male developing embryos	Eggs collected
1	M1	25	75	12500
2		65	35	12500
3	F1	80	20	12500
A	M2	26	74	25000
B		67	33	25000
C		69	31	25000
D	M3	27	73	25000
E		na	na	25000
F		41	59	25000
G		31	69	25000
H		48	52	25000
I	F2	85	15	25000
O		44	56	25000
P	F3	91	9	25000
Q	F4	93.5	6.5	25000
R		78	22	25000
S	M4	30	70	25000
T		54	46	25000
U		56.5	43.5	25000
V		55.5	44.5	25000
Z		72	28	25000

## Sheet: Suppl. Table 2
Supplementary Table 2: The table reports the quantification of total RNA (totRNA) extracted from each sample, the quantification of DNA, the ratio between DNA and RNA, and quantification of double strand DNA (dsDNA) obtained after library preparation.
Sample	totRNA (ng/μL)	DNA (ng/μL)	% ratio DNA/RNA	dsDNA (ng/μL)
1	81.2	501	5.1	43.25
3	113	6.3	0.9	20.2
A	294	11.8	0.7	40.1
D	356	15.3	0.7	37.35
I	172	11.1	1	28.85
P	304	17.2	0.9	15.15
Q	278	21	1.2	10.8
S	304	17.3	0.9	13.05

## Sheet: Suppl. Table 3
Supplementary Table 3: Million raw reads obtained after sequencing (M Seqs) , along with their percentage of GC content (%GC). The table reports additionally the number of million reads kept after quality trimming (M after trimming), the % of total reads mapping to M. galloprovincialis genome, and the percentage of reads aligning concodantly 1 time.
Sample Name	M Seqs	% GC	M after trimming	% Reads aligned	% Reads alingned concordantly 1 time
F1	51.6	0.36	45.2	0.7128	0.5159
F2	72.6	0.37	59.7	0.6991	0.5118
F3	47.5	0.37	39	0.7178	0.5137
F4	46	0.38	37.3	0.7132	0.4893
M1	59.1	0.37	49.7	0.7033	0.516
M2	38	0.36	32.1	0.6963	0.5075
M3	59.2	0.36	52	0.6949	0.4986
M4	67.4	0.37	56.2	0.6806	0.4941

## Sheet: Suppl. Table 4
Supplementary Table 4: TMMs for each sample. Female-biased samples are indicated by "F", male-biased samples by "M".
Feature	F1	F2	F3	F4	M1	M2	M3	M4
MGAL_10NCA000269	71.8181	120.078	128.845	109.264	104.585	74.8964	39.3535	84.8715
MGAL_10B017214	698.505	544.149	432.82	899.083	363.388	280.861	743.53	579.03
MGAL_10B084915	4186.11	8476.11	5933.13	3468.34	9423.26	10239.4	13621.3	6562.87
MGAL_10B069018	1870.22	2824.86	3367.49	4490.73	623.077	2337.84	1763.37	1445.99
MGAL_10B080308	3843.74	3543.81	4133.05	3242.01	1513.82	4004.28	3914.42	2984.78
MGAL_10B060184	236.114	154.277	580.429	265.354	65.5871	460.078	673.196	406.114
MGAL_10B025662	224.309	300.194	385.285	355.887	274.757	152.468	205.141	298.24
MGAL_10B045681	487.969	1146.82	1536.13	914.692	2083.72	719.54	1438.5	981.178
MGAL_10B060146	6421.32	2627.27	2914.65	5197.82	7076.31	5205.3	7889.12	2732.54
MGAL_10B062083	149.539	299.434	127.594	199.796	124.084	133.744	91.2666	111.047
MGAL_10B078150	23195.3	19099.2	26039.2	33061.6	26357.1	15843.3	18095.9	30541.8
MGAL_10B067588	1038.9	702.986	1337.24	468.272	1059.14	1223.75	1261.82	1621.28
MGAL_10NCA000306	4.91905	28.1194	120.089	6.24363	84.1996	140.431	14.2342	222.094
MGAL_10NCA000307	1.96762	16.7197	95.0702	6.24363	88.6312	147.118	15.0715	142.774
MGAL_10B058964	682.764	930.981	1159.61	688.36	1086.62	1794.84	1893.99	1478.51
MGAL_10B092168A	120.025	148.957	130.096	95.2154	190.557	82.921	165.787	99.9421
MGAL_10B092168B	156.426	80.5584	127.594	99.8981	145.355	72.2215	159.089	80.9055
MGAL_10B080424	135.766	291.834	152.613	96.7763	134.719	108.332	205.978	101.529
MGAL_10B064558	3990.33	3690.49	1703.76	3285.71	2657.16	4207.57	2077.36	2903.08
MGAL_10NCA005739	242.017	215.836	0	140.482	122.311	271.499	63.6354	178.468
MGAL_10NCA005738	242.017	215.836	0	140.482	122.311	271.499	63.6354	178.468
MGAL_10B044968	2788.12	2889.46	4553.36	5254.02	3809.37	2773.84	3973.03	3014.13
MGAL_10B038534	2012.87	2145.44	1873.88	1642.08	2167.03	2327.14	1384.91	1459.47
MGAL_10B055710	432.876	555.549	1067.04	1436.04	1051.17	892.069	793.768	476.708
MGAL_10NCA010161	116.09	272.835	170.126	53.0709	110.789	163.167	67.822	262.546
MGAL_10NCA010162	116.09	270.555	160.118	49.9491	97.4943	160.492	66.9847	257.787
MGAL_10B043672	304.981	348.073	351.51	413.641	368.706	345.058	277.986	507.643
MGAL_10B032682	9302.9	8292.95	10425.2	11388.4	8866.66	8086.13	6848.34	4752.8
MGAL_10NCA010164	229.228	29.6394	136.351	377.74	162.195	231.376	100.477	120.565
MGAL_10B050237	115.106	33.4393	95.0702	109.264	272.098	112.345	181.696	122.151
MGAL_10B028286	409.265	255.355	267.698	474.516	218.033	315.635	348.32	195.125
MGAL_10NCA010170	70.8343	121.598	120.089	9.36545	210.056	163.167	262.077	90.4238
MGAL_10B021546	3376.43	2971.54	2316.71	3655.65	2639.44	2575.9	2011.21	4262.61
MGAL_10B016959	417.135	182.396	830.614	693.043	414.794	456.065	236.121	603.619
MGAL_10B030810	19.6762	41.7992	58.7934	90.5327	3.54525	165.842	277.149	125.324
MGAL_10B087692	18.6924	461.311	153.864	87.4108	67.3597	431.992	80.3816	244.303
MGAL_10B064584	6849.28	4289.35	5879.34	8812.89	8873.75	3096.16	2851.87	2574.7
MGAL_10B033360	22271.5	16288	29389.2	37608.5	23968.5	15902.1	15637.6	15962.2
MGAL_10B036683	151.507	145.917	283.96	187.309	145.355	38.7856	319.852	100.735
MGAL_10B001377	23561.3	21303.9	21543.4	16445.7	30981.9	29675	22299.2	38212.8
MGAL_10B051515	997.583	683.986	2629.44	1304.92	2040.29	1584.86	2070.66	2315.33
MGAL_10B044847	519.451	603.428	177.631	143.604	141.81	135.081	61.9608	73.7668
MGAL_10B015055	2494.94	2884.14	2892.14	2730.03	2608.41	2491.64	2177	2088.47
MGAL_10B003284	4925.93	7032.9	5412.75	6112.52	4912.82	6891.8	4377.45	4502.15
MGAL_10B083239	184.956	30.3994	110.081	187.309	38.9977	61.522	40.1908	84.0783
MGAL_10B061613	358.107	361.753	130.096	215.405	163.081	350.408	293.895	374.386
MGAL_10B042875	1758.07	2015.48	2586.91	2353.85	1978.25	2304.4	3191.82	1773.58
MGAL_10B050832	4604.23	5183.1	5576.62	6149.98	4342.04	4227.63	5269.18	4459.32
MGAL_10B045874	17567.9	15772.7	14318.1	18069.1	18500	6083.99	14111.2	11365.6
MGAL_10B017262	753.598	1038.9	507.875	505.734	970.511	1061.92	1272.71	525.886
MGAL_10B016282	576.512	866.383	920.68	365.252	430.747	708.841	646.402	685.317
MGAL_10B009954	2370.98	2871.22	1493.6	394.91	2351.38	1813.56	1688.01	1555.45
MGAL_10B032406	168.231	139.837	92.5684	143.604	155.105	292.898	5.02385	219.714
MGAL_10NCA027768	5496.54	3433.61	2321.72	2027.62	2607.53	3560.25	4168.96	3334.58
MGAL_10B033088	1011.36	1012.3	988.23	836.647	687.778	818.51	219.375	1042.25
MGAL_10B035757	456.488	281.954	267.698	252.867	384.659	460.078	428.702	422.771
MGAL_10B054091	43.2876	121.598	70.0518	40.5836	113.448	98.9702	132.295	77.7328
MGAL_10NCA030429	1310.43	837.503	1502.36	1688.9	1031.67	1679.82	1271.87	832.058
MGAL_10NCA030430	267.596	253.075	331.495	271.598	271.211	383.844	308.129	197.505
MGAL_10NCA030431	528.306	522.11	804.344	764.845	350.979	518.925	499.036	706.734
MGAL_10B090126	579.464	643.707	709.274	663.386	606.237	660.693	504.897	557.614
MGAL_10NCA038117	550.933	193.036	242.679	227.893	670.052	243.413	249.518	423.564
MGAL_10B003539	2880.59	3070.34	2902.14	1873.09	3137.54	3685.97	2895.41	778.914
MGAL_10B059872	1938.1	5139.02	3042.25	4242.55	2866.33	3124.25	2759.77	3302.85
MGAL_10B064320	219.389	183.916	17.5129	24.9745	1.77262	42.7979	0	0
MGAL_10NCA044628	397.459	962.901	718.03	209.162	849.973	478.802	433.726	63.4553
MGAL_10B078075	1979.42	3538.49	2255.42	1657.68	2489.65	1810.89	1878.92	1104.12
MGAL_10B068546	66.899	130.717	80.0591	115.507	141.81	77.5712	83.7308	77.7328
MGAL_10B086780	1271.08	1167.34	640.473	1170.68	960.762	1134.15	1510.5	1020.04
MGAL_10B013776	1303.55	2185.72	2247.91	1220.63	1061.8	1308.01	1224.14	1064.46
MGAL_10B042666	121.009	147.437	460.34	28.0963	59.3829	163.167	52.7504	61.0757
MGAL_10B023553	151.507	180.876	170.126	115.507	147.128	300.923	224.399	195.125
MGAL_10B024261	2611.03	457.511	2171.6	2517.74	2234.39	3022.6	3203.54	2868.97
MGAL_10NCA070276	0	46.3591	382.783	373.057	210.942	493.514	654.775	418.012
MGAL_10B041723	116.09	202.156	195.144	274.72	155.991	203.29	211.002	123.738
MGAL_10B059395	4002.14	4327.35	7340.42	3359.07	4091.21	3244.62	1366.49	3745.45
MGAL_10NCA061908	68.8667	115.518	50.037	87.4108	84.1996	104.32	115.549	172.916
MGAL_10B023341	679.812	573.789	437.823	694.604	214.487	633.944	400.233	9.5183
MGAL_10B047588	297.11	288.794	252.687	543.196	405.931	246.088	378.463	263.34
MGAL_10B047150	338.43	265.995	455.336	346.522	290.71	219.339	276.312	333.14
MGAL_10B092450	24555.9	26041.6	17087.6	11987.8	25841.3	21130.1	19121.6	26166.6
MGAL_10B094125	7110.97	5611.73	8839.03	12560.6	7441.47	5958.27	5812.59	5805.37
MGAL_10B091660	227.26	192.276	820.606	365.252	290.71	200.615	654.775	609.171
MGAL_10B017043	7070.64	9043.82	6035.71	4743.6	6482.48	7343.86	7516.52	7426.65
MGAL_10B027759	1598.69	1469.05	894.411	1100.44	970.511	1624.98	1083.48	1568.14
MGAL_10NCA006745	4900.35	4971.82	3696.48	3359.07	3188.95	2990.51	2300.09	4245.16
MGAL_10B092172	27947.1	42667.1	36624.6	58399.8	20746.8	27440.2	26428	39430.3
MGAL_10B092173	2596.27	3133.42	2342.98	2494.33	1996.86	2130.53	2065.64	3224.32
MGAL_10B077069	796.886	525.909	781.828	672.751	631.054	779.725	684.081	621.862
MGAL_10B092174	36961.7	33386.1	30850.3	30646.9	31541.2	27769.2	32846.8	29387
MGAL_10NCA046574	446.649	161.117	292.716	215.405	280.074	196.603	425.353	265.719
MGAL_10NCA046571	2734.99	3571.93	2112.81	2239.9	2600.44	1927.24	2484.29	2389.09
MGAL_10NCA046568	33.4495	25.8395	55.0407	6.24363	51.4061	61.522	83.7308	274.444
MGAL_10NCA019023	1418.65	642.187	853.13	1106.68	1263.88	537.649	701.664	748.773
MGAL_10B090132	1176.64	1057.9	2109.06	1033.32	822.497	1241.14	1223.31	975.626
MGAL_10B024990	60.9962	82.0784	168.875	159.213	51.4061	88.2707	75.3577	79.3191
MGAL_10B030315	386.637	497.03	1260.93	913.131	532.673	409.255	449.634	1139.82
MGAL_10NCA019016	59.0286	384.552	100.074	476.077	38.9977	542.999	3.34923	70.594
MGAL_10NCA019015	243.001	395.192	210.155	3.12182	23.0441	128.394	125.596	350.591
MGAL_10NCA019013	198.73	117.038	260.192	6.24363	3.54525	68.2092	165.787	210.196
MGAL_10B070481	5666.74	4838.06	4010.46	5845.6	3631.22	3508.09	2374.61	3180.7
MGAL_10B005207	650.298	647.507	540.399	761.723	666.506	850.609	799.629	428.323
MGAL_10B018849	2004.02	1576.21	2222.89	2286.73	1940.14	2333.82	677.382	2608.81
MGAL_10B051803	18862.6	25788.6	22421.6	20928.7	23388	25182.6	25073.2	24907.8
MGAL_10B009958	263.661	3.03994	52.5388	84.289	198.534	179.216	75.3577	322.036
MGAL_10B001783	290.224	246.235	55.0407	12.4873	142.696	24.0738	346.646	16.657
MGAL_10B049120	85.5914	87.3983	93.8193	216.966	94.8353	77.5712	64.4727	69.0077
MGAL_10B029095	5856.62	6857.34	6417.24	5638	7211.03	5395.21	5959.96	5180.33
MGAL_10B028187	1611.48	2000.28	2354.24	2207.12	1791.24	1949.98	1649.5	1698.22
MGAL_10B045916	2290.31	1659.81	1731.28	1230	2251.23	2661.5	1997.82	1584
MGAL_10B062425	1510.15	1247.9	540.399	1228.43	1130.93	623.245	1.67462	636.14
MGAL_10B013530	23.6114	77.5184	117.587	40.5836	139.151	176.541	64.4727	288.722
MGAL_10B071160	936.587	878.542	959.459	967.763	1301.99	1027.15	1081.8	778.121
MGAL_10NCA017798	775.242	563.909	243.93	271.598	210.942	580.447	428.702	456.085
MGAL_10B094495	546.014	971.261	551.658	366.813	288.051	674.067	447.123	478.294
MGAL_10B053651	1209.1	1666.65	3829.08	1567.15	1125.62	1586.2	1358.11	1410.29
MGAL_10B028876	5350.94	6842.14	5635.41	8627.14	6009.19	5704.16	5208.06	6074.26
MGAL_10B006279	159.377	151.237	127.594	145.164	132.947	185.903	131.457	146.74
MGAL_10B028916	287.272	291.834	248.934	610.315	887.198	695.466	671.521	299.033
MGAL_10B039960	1048.74	743.265	1008.24	895.961	928.855	829.21	1120.32	1229.45
MGAL_10B040532	121.992	299.434	312.731	499.491	310.209	136.418	362.554	451.326
MGAL_10B058119	404.346	1697.05	1272.19	1905.87	576.103	528.287	741.855	1088.26
MGAL_10NCA027846	90.5105	258.395	51.2879	608.754	107.244	128.394	66.9847	81.6987
MGAL_10NCA027847	43.2876	346.553	88.8156	276.281	63.8144	223.352	40.1908	24.5889
MGAL_10NCA027848	39.3524	326.793	75.0555	259.111	29.2483	123.044	41.0281	52.3506
MGAL_10NCA027849	667.023	506.15	185.137	519.782	118.766	187.241	309.804	336.313
MGAL_10B092316	273.499	533.509	356.513	302.816	810.089	500.201	1292.8	537.784
MGAL_10NCA051245	31.4819	87.3983	27.5203	15.6091	319.072	41.4605	225.236	153.879
MGAL_10B065799	15380.9	20602.4	19309.3	18679.4	15457.3	13378.4	14722.4	16316.7
MGAL_10B041150	446.649	2536.83	197.646	652.46	650.553	1291.96	910.991	1357.94
MGAL_10B023834	710.31	433.191	820.606	508.856	765.773	1150.19	941.134	448.153
MGAL_10B001047	389.589	229.515	332.746	277.842	280.074	251.438	233.609	228.439
MGAL_10NCA070646	96.4133	88.1582	362.768	53.0709	35.4525	104.32	130.62	79.3191
MGAL_10B001557	310.884	977.34	640.473	799.185	1009.51	238.063	711.712	1327.8
MGAL_10B077660	1496.37	677.146	770.569	700.848	746.274	581.784	701.664	746.393
MGAL_10B011774	3583.03	4193.6	11305.9	3911.64	5316.1	5253.45	2597.33	7084.79
MGAL_10B015406	1229.76	864.863	180.133	168.578	132.947	72.2215	672.358	1542.76
MGAL_10NCA063614	118.057	182.396	145.107	87.4108	163.081	222.014	204.303	120.565
MGAL_10NCA063617	804.756	997.86	441.576	408.958	420.998	596.496	634.68	749.566
MGAL_10B085980	387.621	200.636	332.746	789.819	265.007	345.058	226.911	408.494
MGAL_10B010042	218.406	177.836	107.579	0	163.081	147.118	458.845	226.853
MGAL_10B013957	749.663	700.706	838.119	852.256	1008.62	984.352	830.61	780.5
MGAL_10B074219	174.134	118.558	280.207	96.7763	303.119	105.657	95.4531	190.366
MGAL_10NCA053714	776.226	595.828	562.916	563.488	495.448	575.097	615.422	693.249
MGAL_10NCA053715	90.5105	114.758	67.5499	68.68	92.1764	66.8718	170.811	111.047
MGAL_10B080454	106.251	59.2788	95.0702	68.68	106.357	94.9579	100.477	140.395
MGAL_10B086676	1339.95	341.993	740.547	627.485	245.508	1080.65	823.911	964.521
MGAL_10NCA055246	262.677	148.197	265.196	193.553	218.033	181.891	196.767	173.709
MGAL_10NCA055247	608.978	286.514	220.163	652.46	848.2	219.339	358.368	334.727
MGAL_10NCA055248	584.383	178.596	271.451	424.567	397.954	85.5959	299.756	183.227
MGAL_10NCA055249	852.963	744.785	720.532	396.471	883.653	668.718	846.519	260.96
MGAL_10NCA055250	267.596	303.234	733.042	277.842	335.912	418.617	516.619	157.052
MGAL_10NCA055251	470.261	363.273	806.846	504.173	561.922	497.526	540.064	210.196
MGAL_10B020752	3585	2978.38	4073.01	4462.64	4222.39	2947.71	3588.7	1952.84
MGAL_10NCA059516	311.868	671.827	773.071	736.749	910.242	615.22	88.7547	780.5
MGAL_10B030210	3181.64	1339.09	2373	3440.24	2868.99	3014.58	711.712	1719.64
MGAL_10B021340	1137.28	1366.45	70.0518	730.505	356.297	1051.22	1522.23	1248.48
MGAL_10NCA060782	332.528	808.624	7.50555	693.043	170.172	1219.74	537.552	485.433
MGAL_10B077792	147.571	130.717	2.50185	57.7536	70.9049	189.916	89.592	174.502
MGAL_10B024653	3915.56	1617.25	2354.24	4617.17	2843.29	2377.96	1415.05	2516
MGAL_10NCA067802	625.703	1560.25	310.229	463.59	576.103	159.155	755.252	1223.89
MGAL_10B067746	635.541	601.148	407.801	568.171	1097.25	576.435	1008.12	648.037
MGAL_10B065805	108.219	214.316	57.5425	639.972	237.531	152.468	154.065	141.188
MGAL_10B014703	170.199	120.838	67.5499	231.014	170.172	192.591	68.6593	163.397
MGAL_10B070291	2811.73	4233.12	2503.1	1289.31	2843.29	4055.1	3287.27	4013.55
MGAL_10B038176	641.444	410.392	262.694	536.952	655.871	559.048	437.075	406.114
MGAL_10B035155	2686.78	6323.83	8486.27	9833.72	4033.6	4481.75	4296.23	4021.48
MGAL_10B051828	140.685	504.63	90.0665	39.0227	103.698	197.94	160.763	69.8009
MGAL_10B043604	24771.3	17945.5	21513.4	29206.2	19885.3	16624.3	18684.5	19883.7
MGAL_10B093535	2030.58	2609.03	1895.15	1471.94	1980.91	1579.51	2923.04	4134.11
MGAL_10NCA007593	588.318	912.742	657.986	476.077	836.678	756.988	1075.94	885.202
MGAL_10B076912	5831.04	3812.08	5148.8	6663.52	4657.57	4198.21	4029.13	3146.59
MGAL_10B059427	1717.73	2403.83	1563.66	1067.66	2294.66	2637.42	2121.74	2322.46
MGAL_10B094380	2313.92	2450.19	4628.42	2001.08	2554.35	3659.22	2015.4	4268.96
MGAL_10B022496	487.969	592.028	480.355	508.856	438.724	572.422	547.6	360.109
MGAL_10B086135	30009.1	31212.6	26372	28112	31927.6	23710.1	26204.4	22961.3
MGAL_10B004897	5894	7086.1	5706.72	4395.52	6213.04	5165.17	5916.42	6860.31
MGAL_10NCA011699	749.663	138.317	98.823	71.8018	116.993	117.694	50.2385	208.609
MGAL_10B012940	2127	1763.16	2194.12	1704.51	2616.39	1393.61	1942.55	661.522
MGAL_10NCA011710	137.733	144.397	132.598	87.4108	105.471	133.744	145.692	71.3872
MGAL_10B025236	747.695	987.22	754.307	527.587	827.815	1190.32	1059.19	818.574
MGAL_10B026117	87.559	34.9593	27.5203	156.091	92.1764	82.921	37.6789	169.743
MGAL_10B063398	125.928	127.677	90.0665	109.264	23.0441	123.044	63.6354	224.473
MGAL_10NCA015590	222.341	207.476	316.484	104.581	193.216	127.056	164.112	217.334
MGAL_10B025242	14057.7	10888.3	10706.7	18289.2	9015.56	9225.63	15270	11616.3
MGAL_10B051527	80.6724	34.9593	923.182	21.8527	92.1764	34.7733	48.5639	245.889
MGAL_10B016630	50.1743	212.796	580.429	1230	590.283	1653.07	847.356	653.59
MGAL_10NCA025890	314.819	1179.5	1203.39	2197.76	993.555	845.259	793.768	2262.18
MGAL_10B070544	133.798	21.2796	10.0074	112.385	230.441	155.142	98.8024	4.75915
MGAL_10B005021	31.4819	104.118	175.129	124.873	265.007	187.241	195.093	88.8374
MGAL_10B059222	1833.82	1198.5	1188.38	961.519	1730.08	1727.97	1438.5	1115.23
MGAL_10B008082	2359.17	4813.74	880.651	3128.06	2003.06	3017.25	4538.21	1748.19
MGAL_10B056274	716.213	1038.14	775.573	2197.76	1118.53	430.654	986.349	493.365
MGAL_10B047983	11331.5	13311.9	20839.1	22168	11995.3	15439.4	11775.9	9042.38
MGAL_10B043001	274.483	139.077	277.705	332.473	311.095	176.541	314.828	184.814
MGAL_10NCA043360	1410.78	585.948	1012	1112.93	987.351	609.87	1013.14	1083.5
MGAL_10NCA043361	1839.72	745.545	1218.4	958.398	1549.27	970.978	2123.41	2558.84
MGAL_10B026209	151.507	380.752	250.185	255.989	656.757	418.617	140.668	272.858
MGAL_10B056079	1066.45	1902.24	1561.15	1938.65	1444.69	1579.51	1718.16	1860.83
MGAL_10B007032	5008.57	2888.7	2844.6	6137.49	2874.31	1552.76	1533.11	1176.3
MGAL_10NCA045315	61.98	607.988	208.904	201.357	19.4989	300.923	118.06	160.225
MGAL_10NCA045317	299.078	851.943	785.58	126.434	1.77262	362.445	100.477	489.399
MGAL_10B081532	446.649	324.514	944.448	583.78	375.796	460.078	334.086	615.517
MGAL_10B049440	398.443	592.788	313.982	1114.49	444.042	422.63	355.856	641.692
MGAL_10B065769	134.782	313.114	516.632	366.813	303.119	199.278	118.898	470.363
MGAL_10B009538	1074.32	866.383	878.149	830.403	1233.75	548.348	569.37	777.328
MGAL_10B053717	200.697	446.871	405.299	171.7	31.9072	139.093	174.16	125.324
MGAL_10B002325	340.398	627.747	860.636	652.46	983.806	192.591	790.419	621.862
MGAL_10B068123	23.6114	15.1997	12.5092	9.36545	1.77262	167.179	26.7939	170.536
MGAL_10B001177	1022.18	1462.21	1656.22	939.667	761.342	1044.54	979.651	1765.64
MGAL_10B073801	3506.3	4561.43	7476.77	1442.28	3249.22	3517.45	841.495	1890.18
MGAL_10NCA066483	734.906	67.6386	288.963	134.238	324.39	662.03	17.5835	181.641
MGAL_10B004143	760.485	581.388	1328.48	1487.55	1216.02	1023.14	899.269	885.995
MGAL_10B077927	204.632	165.677	275.203	560.366	106.357	355.758	202.629	249.062
MGAL_10B043790	1973.52	1551.89	943.197	1311.16	1484.57	821.185	1475.34	1597.49
MGAL_10B043590	293.175	832.943	335.248	462.029	201.193	461.415	149.041	345.831
MGAL_10B016599	57.0609	139.837	82.561	59.3145	93.949	64.1969	110.525	112.633
MGAL_10B006587	9981.73	6189.32	10328.9	6277.97	4430.67	7278.32	7299.65	8696.55
MGAL_10B074450	816.562	798.744	911.924	980.25	689.55	716.865	813.026	891.547
MGAL_10NCA038108	1230.75	1614.21	1373.51	636.85	1456.21	1197	936.111	1376.98
MGAL_10NCA038114	1199.26	1567.09	1338.49	604.071	1439.37	1184.97	869.963	1333.35
MGAL_10B091959	372.864	500.83	933.189	216.966	606.237	275.512	795.443	254.614
MGAL_10NCA003454	226.276	23.5595	257.69	187.309	46.0882	215.327	273.8	329.174
MGAL_10B013045	7801.61	6669.63	12076.4	17298	15826	6449.11	4307.11	9248.61
MGAL_10B006071	1028.08	1037.38	1598.68	2350.73	1182.34	1140.83	1139.58	1215.17
MGAL_10B041066	566.674	564.669	1264.68	711.774	859.722	995.052	619.608	1258
MGAL_10NCA042360	232.179	121.598	132.598	260.672	42.543	58.8472	102.152	333.934
MGAL_10B024005	240.049	193.036	190.14	285.646	51.4061	120.369	154.065	360.902
MGAL_10B013496	12102.8	13717.7	17850.7	17460.3	13713	11633	11657	13716.7
MGAL_10B012967	281.369	224.955	449.082	341.839	297.801	243.413	357.531	569.511
MGAL_10B075984	207.584	445.351	437.823	174.822	228.668	508.225	432.051	456.085
MGAL_10B045896	9826.29	12767.7	7790.76	7520.45	10657.9	11753.4	10839	13393
MGAL_10NCA011728	147.571	117.038	572.923	229.453	172.831	171.192	106.338	649.624
MGAL_10B034951	3213.12	2666.79	3571.39	3590.09	2508.26	2099.77	1845.43	3431.35
MGAL_10B089728	251.855	164.917	273.952	271.598	189.671	185.903	162.438	180.848
MGAL_10B071742	304.981	221.916	137.602	362.131	115.221	101.645	221.049	302.999
MGAL_10B052459	8545.37	6253.91	6099.51	6356.02	3938.77	8215.86	3818.13	4345.1
MGAL_10B032976	4293.34	3287.69	2670.72	2901.73	2116.51	3846.46	1977.72	2185.24
MGAL_10NCA015612	650.298	323.754	1125.83	262.233	639.917	405.243	344.971	706.734
MGAL_10B066586	3968.69	2288.31	5213.85	2769.05	3497.39	2547.81	2754.74	3844.6
MGAL_10B066481	5179.76	5553.21	4452.04	4273.77	4217.07	4800.06	4540.72	3652.65
MGAL_10NCA015614	1471.78	1462.21	984.477	705.53	847.314	1508.63	788.744	353.763
MGAL_10NCA015615	999.55	1024.46	661.739	485.442	574.33	1215.73	620.445	231.612
MGAL_10B091740	2239.15	2129.48	1532.38	2622.33	2570.3	2883.51	3973.86	1281.8
MGAL_10NCA055981	225.292	566.189	420.311	249.745	578.761	522.937	762.788	372.8
MGAL_10B081384	799.837	986.46	685.506	650.899	769.318	896.082	1058.36	810.642
MGAL_10B078090	430.909	445.351	630.466	664.947	459.996	516.25	381.813	289.515
MGAL_10B036154	11.8057	18.2396	0	21.8527	210.942	472.115	211.002	4.75915
MGAL_10B054626	1588.85	1586.09	1284.7	2826.8	1434.94	830.547	878.336	1094.6
MGAL_10NCA021373	225.292	199.876	111.332	82.7281	272.098	66.8718	87.0801	136.429
MGAL_10B064052	1444.23	674.866	540.399	905.327	528.242	484.152	763.625	496.538
MGAL_10B047005	21788.4	17571.6	24440.6	28402.3	21338.8	11061.9	14343.1	19610.9
MGAL_10B002288	133.798	148.957	240.177	202.918	318.186	117.694	187.557	202.264
MGAL_10B061598	90.5105	157.317	275.203	295.012	46.0882	77.5712	126.434	127.704
MGAL_10NCA025901	213.487	106.398	50.037	78.0454	43.4293	80.2461	0	1.58638
MGAL_10B050041	2839.27	1762.4	1851.37	2591.11	1561.68	2357.9	1599.26	1581.62
MGAL_10B051850	57.0609	107.918	195.144	405.836	1.77262	104.32	147.366	15.8638
MGAL_10B033106	12489.5	10192.9	15731.6	22541.1	15330.5	10763.7	12309.3	9567.48
MGAL_10NCA028898	5474.9	5833.64	5974.41	3799.25	7619.62	4849.54	7128	6046.5
MGAL_10B015016	230.211	208.236	83.8119	78.0454	169.286	41.4605	49.4012	88.8374
MGAL_10B002611	1054.64	941.621	2720.76	2277.36	1013.05	1138.16	699.152	1942.53
MGAL_10NCA028904	331.544	289.554	596.691	330.913	210.056	262.137	211.839	522.713
MGAL_10NCA028905	112.154	183.916	389.037	266.915	179.035	203.29	159.926	343.452
MGAL_10B037209	100.349	85.1183	150.111	59.3145	77.9954	104.32	161.6	106.288
MGAL_10B067640	45.2552	129.197	557.912	40.5836	515.833	171.192	41.8654	170.536
MGAL_10B001442	1261.24	2592.31	3317.45	5719.17	2536.62	1698.54	3279.74	3960.41
MGAL_10NCA028914	218.406	1048.02	1250.92	699.287	251.712	405.243	1582.51	816.987
MGAL_10B000392	5517.2	10605.6	11103.2	10692.2	6978.82	3343.59	10581.1	10954.8
MGAL_10B093863	16144.3	14243.6	3985.44	3828.91	10509	11197	14224.2	11522.7
MGAL_10B024557	0	15.1997	10.0074	24.9745	111.675	20.0615	174.997	92.8034
MGAL_10B001695	2408.37	1759.36	2245.41	5820.63	2750.22	2761.8	2383.82	2614.36
MGAL_10B068114	12391.1	11051.7	15196.2	16022.7	10492.2	8879.23	8490.31	13235.2
MGAL_10B031749	61.98	131.477	30.0222	71.8018	144.469	0	198.442	104.701
MGAL_10B037361	339.414	2.27995	12.5092	54.6318	62.0418	8.02461	92.1039	230.819
MGAL_10B094598	597.172	0	15.0111	771.089	841.11	378.494	539.226	454.499
MGAL_10B094599	572.577	22.7995	45.0333	349.643	957.216	314.297	480.615	819.367
MGAL_10B045051	29.5143	151.237	70.0518	9.36545	21.2715	56.1723	141.505	234.785
MGAL_10B008376	1469.81	1893.88	2681.98	4810.72	2235.28	1195.67	2192.91	1541.96
MGAL_10B017642	861.817	246.235	580.429	708.652	342.116	941.554	705.013	312.517
MGAL_10B028507	785.08	500.83	963.212	3487.07	391.75	635.282	529.179	503.677
MGAL_10B006594	419.103	452.951	245.181	181.065	60.2692	181.891	70.3339	230.026
MGAL_10B011535	739.825	354.913	220.163	593.145	453.792	1051.22	272.962	610.757
MGAL_10B092043	22497.8	21288.7	22988.2	29930.4	24373.6	16204.4	22295.8	15027.8
MGAL_10B060474	709.327	565.429	851.879	1790.36	606.237	664.705	300.594	333.14
MGAL_10NCA047338	150.523	123.118	117.587	285.646	171.944	149.793	21.77	92.8034
MGAL_10NCA047339	281.369	177.836	193.893	346.522	188.784	299.585	49.4012	145.154
MGAL_10NCA047341	229.228	124.638	172.628	380.862	163.968	12.0369	37.6789	95.183
MGAL_10NCA047344	291.208	120.838	295.218	352.765	109.016	61.522	42.7027	180.848
MGAL_10B058989	1204.18	1460.69	1015.75	1938.65	1441.14	1556.77	1252.61	1532.45
MGAL_10B057411	470.261	489.43	670.495	1813.78	657.643	493.514	803.816	325.209
MGAL_10B040196	739.825	425.591	317.735	6.24363	81.5407	116.357	187.557	355.35
MGAL_10B069441	242.017	227.235	160.118	327.791	271.211	211.315	185.882	276.031
MGAL_10B033503	1060.55	1659.81	1753.8	1267.46	1776.17	1346.8	1039.1	1632.39
MGAL_10B026660	15947.6	19419.1	19992.3	16848.4	18582.4	18411.1	18239.9	14913.6
MGAL_10B045249	4619.97	3761.92	5439.02	6090.66	4794.95	5047.48	3049.48	3745.45
MGAL_10B063685	112.154	265.995	225.166	115.507	152.446	177.879	154.065	307.758
MGAL_10B058528	171.183	345.033	27.5203	131.116	1481.91	377.157	117.223	494.951
MGAL_10NCA070446	163.312	150.477	97.5721	165.456	124.084	197.94	155.739	85.6647
MGAL_10B073570	2601.19	3792.32	3540.12	2862.71	2072.2	2557.18	2835.13	2714.3
MGAL_10B092389	283.337	253.835	302.724	274.72	299.573	476.127	381.813	388.664
MGAL_10B027892	4588.49	3799.92	6634.9	7704.64	7216.35	3429.18	3478.18	4019.89
MGAL_10B002512	1576.06	1675.01	1646.22	2144.69	1306.42	1249.16	1259.31	1166.78
MGAL_10B009731	141.669	386.072	260.192	62.4363	56.7239	34.7733	33.4923	12.6911
MGAL_10B013999	1700.02	1979	2809.58	3474.58	1262.11	1591.55	1405.84	1329.39
MGAL_10B002002	121.992	47.1191	182.635	284.085	120.538	168.517	102.152	69.8009
MGAL_10B078891	53.1257	287.274	62.5462	124.873	79.768	58.8472	36.8416	125.324
MGAL_10B075159	198.73	346.553	142.605	156.091	201.193	262.137	159.089	518.747
MGAL_10B028236	478.131	681.706	345.255	410.519	568.126	378.494	252.867	553.648
MGAL_10B055913	7803.58	6434.79	8331.16	8875.32	7905.01	6093.35	6739.49	5807.75
MGAL_10B089906	5395.21	7785.28	5323.93	2892.36	3665.78	6301.99	6420.48	7386.2
MGAL_10B060718	684.731	785.064	396.543	527.587	444.928	666.043	797.117	741.634
MGAL_10B031487	139.701	129.957	457.838	502.612	420.112	192.591	633.005	253.821
MGAL_10B092217B	914.943	523.63	2777.05	2155.61	1739.83	1384.25	742.692	1560.21
MGAL_10B092217A	517.484	630.787	600.444	551.001	278.302	449.378	253.704	258.58
MGAL_10B025525	81640.4	70216.5	82275.8	72031.2	89098.2	66617.6	73112.9	67905.9
MGAL_10B042520	800.821	570.749	266.447	90.5327	642.576	687.442	601.187	480.674
MGAL_10B056103	4017.88	2626.51	4455.79	4701.45	2852.15	2632.07	2031.31	2920.53
MGAL_10B048568	138.717	120.078	180.133	319.986	337.685	109.67	136.481	170.536
MGAL_10B042499	982.826	442.311	1681.24	877.23	2936.35	763.676	2382.98	1893.35
MGAL_10B033580	1275.02	1067.02	1886.39	2076.01	1722.99	730.24	828.935	871.717
MGAL_10B039000	950.36	440.791	470.347	1788.8	209.17	842.584	485.639	425.151
MGAL_10B014281	601.108	320.714	719.281	786.698	582.307	789.087	506.571	452.119
MGAL_10B048325	262.677	215.836	477.853	487.003	237.531	275.512	242.819	289.515
MGAL_10B042300	1475.71	968.981	758.06	1382.96	914.674	655.343	1127.02	1286.56
MGAL_10B074879	220.373	66.8787	1017	499.491	289.824	283.536	1049.15	123.738
MGAL_10B030335	1312.4	578.348	1047.02	1017.71	327.935	1282.6	801.304	360.109
MGAL_10B087907	7929.5	6854.3	11335.9	10320.7	8467.82	8583.66	8230.74	5138.29
MGAL_10B057385	33.4495	40.2792	56.2916	106.142	72.6775	57.5097	383.487	120.565
MGAL_10B044801	1119.58	764.545	948.201	949.032	1001.53	914.806	922.714	1212
MGAL_10B077891	55.0933	57.7588	258.941	212.283	21.2715	227.364	77.8697	44.4187
MGAL_10NCA025915	104.284	0	406.55	202.918	16.8399	121.707	61.1235	54.7302
MGAL_10NCA025920	71.8181	168.717	111.332	276.281	198.534	211.315	275.474	279.997
MGAL_10B034644	1646.9	1167.34	1250.92	789.819	1157.52	1160.89	1039.94	918.516
MGAL_10B077976	137.733	227.995	40.0296	53.0709	86.8585	335.696	72.0085	22.2094
MGAL_10B061023	607.994	484.11	422.812	657.142	716.14	889.394	979.651	293.481
MGAL_10NCA036654	74.7695	152.757	1137.09	1367.36	182.58	93.6205	51.9131	195.125
MGAL_10NCA036655	74.7695	152.757	1137.09	1367.36	182.58	93.6205	51.9131	195.125
MGAL_10B092094	470.261	465.111	684.256	432.372	372.251	470.777	491.5	395.009
MGAL_10B058610	767.371	320.714	190.14	421.445	1223.11	1492.58	517.456	266.512
MGAL_10B050435	12972.5	10949.9	14846	10353.5	12192.1	12506.4	13346.7	12362.7
MGAL_10B080887	163.312	48.639	140.104	146.725	164.854	86.9333	250.355	106.288
MGAL_10B074133	155.442	94.2381	162.62	156.091	111.675	187.241	202.629	139.602
MGAL_10B060646	221.357	220.396	187.639	287.207	109.903	366.457	287.197	111.047
MGAL_10B054607	4964.3	4225.52	3755.27	5263.38	5039.57	6534.71	6360.19	3313.95
MGAL_10B016952	799.837	744.025	497.868	285.646	1820.48	1994.12	1837.05	467.19
MGAL_10B036356	226.276	379.992	265.196	78.0454	90.4038	106.995	410.281	139.602
MGAL_10NCA047350	41.32	4.55991	20.0148	59.3145	12.4084	339.709	398.559	120.565
MGAL_10B086758	891.331	601.908	835.617	387.105	579.648	601.846	373.439	1069.22
MGAL_10B063644	419.103	682.466	735.543	830.403	888.084	754.313	703.339	908.997
MGAL_10B048868	1696.09	2292.11	2119.07	1557.79	1820.48	2953.06	1835.38	1819.58
MGAL_10B074220	1529.82	1414.33	1882.64	1112.93	1392.4	1423.03	1006.44	1263.55
MGAL_10B076737	1082.19	783.544	1172.12	594.706	1019.26	842.584	582.766	854.267
MGAL_10B086629	285.305	249.275	248.934	1821.58	800.339	205.965	1085.99	166.57
MGAL_10B006431	914.943	813.184	410.303	387.105	327.935	157.817	262.915	1069.22
MGAL_10NCA058665	269.564	174.037	327.742	284.085	393.522	197.94	416.142	223.68
MGAL_10B055792	521.419	446.871	240.177	237.258	499.88	732.915	587.79	425.151
MGAL_10B087057	266.612	302.474	243.93	299.694	232.214	212.652	299.756	176.089
MGAL_10B049191	5084.33	4233.12	4570.88	15009.7	3190.72	1230.44	1026.54	4426.01
MGAL_10B054516	4909.21	4400.31	8271.11	14235.5	4929.66	3132.27	6440.57	5501.58
MGAL_10B023551	539.128	229.515	108.83	382.422	848.2	201.953	314.828	57.1098
MGAL_10B005706	265.629	1079.18	427.816	515.1	856.177	141.768	539.226	637.726
MGAL_10B003826	2274.57	2140.12	3167.34	3109.33	2988.64	2559.85	2052.24	2245.53
MGAL_10NCA002704	227.26	299.434	117.587	162.334	283.62	302.26	348.32	123.738
MGAL_10B076775	944.457	1108.82	800.591	861.621	972.284	1011.1	921.039	1911.59
MGAL_10B049873	203.649	174.037	132.598	204.479	132.947	208.64	88.7547	986.73
MGAL_10B038907	181.021	113.238	166.373	206.04	117.879	62.8595	161.6	98.3557
MGAL_10B073470	683.748	387.592	1068.29	610.315	570.785	577.772	617.096	725.77
MGAL_10B030333	1278.95	1051.06	819.355	1520.32	693.982	712.853	881.686	1160.44
MGAL_10B091132	521.419	300.194	435.322	260.672	318.186	291.561	293.058	658.349
MGAL_10B034189	1985.33	2026.12	1678.74	1651.44	1797.44	1495.25	1448.54	1589.56
MGAL_10B049368	226.276	151.997	220.163	131.116	165.74	112.345	480.615	134.843
MGAL_10B078013	857.882	1328.45	532.894	1036.44	1369.35	157.817	1260.99	1564.17
MGAL_10B047760	248.904	272.075	431.569	99.8981	154.218	156.48	169.136	162.604
MGAL_10NCA061244	29.5143	56.2389	47.5351	49.9491	419.225	377.157	53.5877	200.677
MGAL_10NCA061245	23.6114	53.1989	45.0333	48.3881	406.817	350.408	50.2385	162.604
MGAL_10NCA019003	43.2876	20.5196	442.827	237.258	60.2692	34.7733	64.4727	250.649
MGAL_10NCA019004	72.8019	28.1194	162.62	280.963	20.3852	28.0861	61.9608	141.188
MGAL_10NCA019005	70.8343	23.5595	237.676	296.573	5.31787	14.7118	57.7743	156.259
MGAL_10NCA019006	313.835	163.397	441.576	199.796	179.035	161.83	44.3773	161.811
MGAL_10B093220	2457.56	1506.29	3907.89	3095.28	1751.35	1505.95	1982.75	2282.01
MGAL_10B006085	4832.47	4589.55	6423.5	2459.99	2107.65	3870.54	3062.04	2442.24
MGAL_10B022612	11754.6	10574.4	12624.3	5842.48	4346.47	10930.9	8718.89	5785.54
MGAL_10B082969	154.458	393.672	223.915	224.771	243.736	295.573	687.43	394.216
MGAL_10B032134	202.665	278.154	202.65	62.4363	221.578	53.4974	755.252	149.12
MGAL_10NCA022590	126.911	176.316	80.0591	187.309	193.216	137.756	128.945	51.5574
MGAL_10B094501	250.871	432.431	145.107	290.329	388.204	208.64	291.383	134.843
MGAL_10NCA022593	182.005	231.035	186.388	301.255	179.921	863.983	134.807	387.871
MGAL_10B050086	316.787	212.036	242.679	357.448	327.049	177.879	310.641	178.468
MGAL_10B008296	209.551	177.836	130.096	71.8018	167.513	213.99	194.255	174.502
MGAL_10B008992	559.788	712.866	142.605	352.765	186.125	104.32	75.3577	920.895
MGAL_10B062584	19.6762	265.995	107.579	177.944	58.4966	40.1231	43.54	129.29
MGAL_10B010952	747.695	662.707	325.24	580.658	744.502	310.285	1748.3	307.758
MGAL_10B001669	1003.49	715.906	317.735	563.488	829.588	995.052	712.549	2652.43
MGAL_10B040068	157.41	352.633	135.1	246.623	184.353	235.389	205.978	171.329
MGAL_10B043754	224.309	165.677	228.919	299.694	258.803	197.94	241.982	242.717
MGAL_10NCA031543	112.154	157.317	73.8045	87.4108	163.968	220.677	135.644	211.782
MGAL_10B025331	334.495	440.791	422.812	349.643	370.478	465.427	562.671	601.239
MGAL_10B065954	3880.14	3263.37	2885.88	2909.53	3330.76	3236.59	3320.76	2509.66
MGAL_10B055019	102.316	142.877	240.177	115.507	230.441	144.443	46.8893	319.656
MGAL_10B010318	118.057	121.598	97.5721	96.7763	62.0418	98.9702	45.2146	123.738
MGAL_10B067844	1676.41	2041.32	2026.5	1929.28	1483.69	1267.89	1220.8	2768.24
MGAL_10B064289	153.474	148.957	65.0481	140.482	53.1787	69.5466	10.0477	34.9004
MGAL_10B030419	214.47	379.992	287.713	196.674	243.736	197.94	239.47	387.871
MGAL_10B094085	668.99	957.581	800.591	682.117	867.699	964.291	985.512	959.762
MGAL_10B029391	5078.42	3899.48	8952.86	6538.64	1228.43	5273.51	6181.01	4451.39
MGAL_10B021861	818.529	691.586	790.584	917.814	1373.78	833.222	673.196	721.804
MGAL_10B082672	2422.14	2393.19	2140.33	2110.35	2975.35	2899.56	2820.05	1651.42
MGAL_10B069831	10396.9	9898.04	11763.7	7136.47	14434.5	8911.33	14943.4	6035.39
MGAL_10B062637	15.741	151.997	43.7823	252.867	116.107	111.007	589.465	321.243
MGAL_10B035749	37.3848	10.6398	12.5092	49.9491	276.529	164.505	30.1431	36.4868
MGAL_10NCA044158	3971.64	4630.59	4093.02	5453.81	2759.09	3653.87	4162.26	5051.04
MGAL_10NCA044159	3971.64	4629.07	4093.02	5453.81	2758.2	3652.54	4162.26	5051.04
MGAL_10NCA044160	3968.69	4624.51	4088.02	5450.69	2756.43	3652.54	4158.07	5045.49
MGAL_10B003470	2218.49	2926.7	1652.47	1415.74	2539.28	3262	2696.97	2560.42
MGAL_10B008362	1539.66	1925.04	1274.69	1041.13	1689.31	1885.78	1580.84	1662.53
MGAL_10NCA047361	27.5467	372.393	72.5536	84.289	85.0859	189.916	212.676	28.5549
MGAL_10B019787	472.229	452.951	920.68	1150.39	519.379	302.26	433.726	531.438
MGAL_10B013238	166.264	107.918	160.118	9.36545	74.4502	192.591	11.7223	300.62
MGAL_10B054995	1235.66	1006.22	1681.24	1929.28	1372.01	1316.04	854.054	1062.88
MGAL_10B012661	621.768	1121.74	2271.68	1712.32	1045.85	1936.61	1364.81	883.615
MGAL_10NCA052738	155.442	642.947	477.853	188.87	154.218	197.94	432.051	1.58638
MGAL_10B059008	3883.1	2396.23	2599.42	3619.75	3258.97	1413.67	4134.63	2819
MGAL_10B067562	996.599	744.785	698.016	914.692	734.752	873.345	759.439	797.157
MGAL_10B004579	159.377	614.068	1004.49	124.873	233.986	163.167	150.715	244.303
MGAL_10B011131	417.135	360.233	460.34	552.561	434.293	473.452	376.789	483.054
MGAL_10B084131	2250.96	896.022	3520.1	5375.77	2853.92	1069.95	1260.15	1405.54
MGAL_10B025276	9.83809	2567.99	1456.08	902.205	1464.19	3241.94	1335.51	2110.68
MGAL_10B006969	1824.97	1456.89	1313.47	2578.62	1083.07	1299.99	1461.1	1995.67
MGAL_10B017434	149.539	296.394	232.672	202.918	164.854	338.371	267.939	171.329
MGAL_10B054863	365.977	422.552	1285.95	1027.08	63.8144	302.26	367.578	188.78
MGAL_10B020826	109.203	39.5192	141.354	0	54.9513	53.4974	226.911	106.288
MGAL_10B009593	16558.5	12840.7	21156.9	18211.1	8317.15	14590.1	8182.18	10294.8
MGAL_10B052806	826.4	643.707	993.234	1311.16	355.411	440.016	375.951	245.889
MGAL_10B070111	6567.91	4918.62	9902.32	10789	3020.55	6137.49	3493.25	3290.16
MGAL_10NCA002742	307.932	132.237	899.414	187.309	376.682	195.266	247.006	1215.17
MGAL_10B042952	3564.34	4174.6	9355.66	11621	3793.41	6112.08	3929.49	5010.59
MGAL_10B023842	524.37	561.629	1188.38	783.576	1040.53	855.959	846.519	1028.77
MGAL_10B068341	311.868	269.035	507.875	574.414	781.727	299.585	283.01	374.386
MGAL_10B043591	143.636	1276.77	1671.23	346.522	1320.6	478.802	1207.4	782.087
MGAL_10B089491	552.901	460.551	300.222	604.071	634.599	330.347	305.617	533.025
MGAL_10B024715	133.798	263.715	261.443	121.751	184.353	125.719	195.093	141.188
MGAL_10B042668	824.432	1158.22	1199.64	700.848	1225.77	1084.66	1181.44	1448.37
MGAL_10B083655	1093.01	1754.04	920.68	702.409	1079.53	1642.37	1503.81	1511.82
MGAL_10B087990	3630.26	3207.9	4754.76	3738.37	3872.3	3925.37	3283.09	3022.06
MGAL_10B060042	133.798	259.915	125.092	59.3145	143.582	226.027	200.954	293.481
MGAL_10B038955	1596.72	1450.81	1558.65	2205.56	1517.37	1116.76	1319.6	1261.17
MGAL_10B033149	51.1581	127.677	155.115	96.7763	241.077	288.886	102.152	50.7643
MGAL_10B056997	696.537	1999.52	1966.45	1311.16	1596.25	2034.24	1741.6	1280.21
MGAL_10B047065	1404.88	1494.13	1667.48	1503.15	1682.22	1781.46	2021.26	1281.8
MGAL_10B048882	1035.95	1357.33	1009.5	949.032	1105.23	1753.38	1405.84	1286.56
MGAL_10B067529	1611.48	1996.48	1527.38	1631.15	1620.18	2455.53	2302.6	2216.97
MGAL_10B056597	663.088	991.78	783.079	188.87	744.502	648.656	526.667	683.731
MGAL_10B007741	2544.13	3150.14	3168.59	1125.41	2826.45	2363.25	2124.25	2555.66
MGAL_10B066059	139.701	333.633	631.717	1208.14	448.474	267.487	324.876	575.857
MGAL_10B052063	7216.24	9651.81	11503.5	8614.65	9691.82	10500.2	10977.9	9799.09
MGAL_10NCA034272	321.706	331.353	607.949	198.235	389.091	315.635	565.183	276.824
MGAL_10NCA034273	762.452	937.061	1421.05	507.295	1082.19	641.969	1668.76	966.9
MGAL_10B022977	316.787	30.3994	147.609	633.729	81.5407	472.115	150.715	401.355
MGAL_10B007372	220.373	145.917	45.0333	46.8272	77.9954	176.541	40.1908	53.937
MGAL_10B073572	2691.7	1969.88	2989.71	3743.06	2891.15	2888.86	2844.34	1887.8
MGAL_10B042352	816.562	375.432	685.506	277.842	478.608	291.561	699.99	634.553
MGAL_10B009332	6753.85	5789.56	4179.34	5172.85	3476.11	3201.82	7817.11	6991.19
MGAL_10B018432	275.467	357.193	369.023	181.065	239.304	235.389	358.368	344.245
MGAL_10NCA025942	1012.34	614.828	532.894	530.709	762.228	575.097	576.068	434.669
MGAL_10B069460	19213.8	15518.1	27579.1	30675	16066.2	15940.9	17013.3	11989.9
MGAL_10B081896	8836.58	6400.59	7669.42	12090.8	9446.31	10520.3	4029.96	10148.9
MGAL_10B042025	1814.14	1532.89	2656.96	3121.82	1398.6	1155.54	1962.65	1964.74
MGAL_10B035084	10028	14928.4	14547	11764.6	12700	10958.9	8930.73	7881.94
MGAL_10NCA031551	774.258	530.469	590.436	71.8018	1099.03	999.064	370.928	280.79
MGAL_10B008803	2154.54	1500.21	451.584	1161.32	1881.64	1043.2	2967.42	1424.57
MGAL_10B002654	2982.91	3473.13	1586.17	655.581	3318.35	4116.63	3932	2421.61
MGAL_10B069725	186.924	249.275	362.768	349.643	106.357	377.157	216.026	259.374
MGAL_10B090586	2687.77	2644.75	2391.77	1765.39	2792.77	2642.77	3111.44	3124.38
MGAL_10B036337	3099	4755.98	2619.44	1943.33	2355.82	4402.84	4390.84	4401.42
MGAL_10B008283	6767.62	6406.67	3647.69	2872.07	5675.94	6144.18	5398.13	6365.36
MGAL_10B047454	8996.94	6465.19	10071.2	12382.7	8176.22	7608.67	7669.74	6168.65
MGAL_10B069031	756.549	150.477	125.092	121.751	118.766	240.738	192.581	130.083
MGAL_10B060950	1877.11	1740.37	3857.85	1929.28	1246.15	1888.46	2214.68	1343.67
MGAL_10B004814	655.217	763.025	1048.27	892.839	946.581	1083.32	380.138	287.135
MGAL_10B022085	1550.48	536.549	3154.83	1283.07	1880.75	2923.63	2511.92	1997.26
MGAL_10B077326	857.882	891.462	841.872	891.278	650.553	806.473	809.677	944.691
MGAL_10NCA045356	371.88	591.268	349.008	273.159	388.204	613.883	333.249	472.742
MGAL_10NCA045358	1321.26	1747.21	554.159	288.768	728.548	1295.97	0	0
MGAL_10B081321	6628.91	7821	9184.29	9602.71	7880.2	6882.44	5214.76	4489.46
MGAL_10B032285	340.398	648.267	507.875	870.987	997.987	1130.13	736.831	834.437
MGAL_10B070087	290.224	392.912	472.849	568.171	450.246	537.649	721.76	555.234
MGAL_10B076549	105.268	240.155	192.642	614.998	251.712	219.339	338.273	142.774
MGAL_10B041272	1019.23	636.867	462.842	689.921	826.042	874.683	190.906	810.642
MGAL_10B016184	2373.93	2837.02	1583.67	1353.31	3027.64	2608	2883.69	2239.18
MGAL_10B072953	10569.1	10922.5	7366.69	4695.21	12690.2	9855.56	11181.4	10623.2
MGAL_10B081818	391.556	325.273	286.462	234.136	512.288	270.162	363.392	291.894
MGAL_10B022787	41422.3	48870.8	61090.1	75944.4	50643.8	42493	47405	41630.7
MGAL_10B087197	238.082	443.831	402.798	199.796	432.52	324.997	271.288	393.423
MGAL_10B015664	94.4457	117.038	5.0037	140.482	78.8817	227.364	362.554	22.2094
MGAL_10B090447	261.693	569.989	1368.51	1532.81	608.01	537.649	229.422	504.47
MGAL_10B019487	1318.3	1486.53	487.86	886.596	838.451	1366.86	977.976	950.243
MGAL_10B019586	110.187	15.1997	17.5129	206.04	577.875	494.851	447.123	652.797
MGAL_10B067447	364.009	194.556	191.391	159.213	371.365	196.603	362.554	166.57
MGAL_10NCA069591	271.531	134.517	52.5388	81.1672	12.4084	168.517	36.8416	44.4187
MGAL_10B077387	243.985	275.114	394.041	602.511	238.418	271.499	209.327	259.374
MGAL_10NCA070866	206.6	493.99	60.0444	218.527	0	537.649	239.47	133.256
MGAL_10B037168	794.918	1910.6	3227.38	2160.3	1838.21	1634.35	2314.32	1050.19
MGAL_10B079563	423.038	873.983	1790.07	1495.35	815.407	1198.34	641.378	483.847
MGAL_10B030996	267.596	855.743	475.351	515.1	290.71	267.487	209.327	415.632
MGAL_10B035253	1117.61	490.95	192.642	633.729	691.323	102.983	249.518	26.9685
MGAL_10B056831	31.4819	281.954	45.0333	106.142	114.334	30.761	244.494	141.981
MGAL_10B032897	222.341	136.797	225.166	312.182	288.938	288.886	323.201	387.077
MGAL_10B064576	582.415	113.998	62.5462	243.502	85.0859	254.113	236.121	156.259
MGAL_10B021816	705.391	1227.38	803.093	1276.82	733.866	1003.08	672.358	1152.51
MGAL_10B033676	6270.8	6221.24	6367.2	6302.95	8305.63	7139.23	6527.65	5909.28
MGAL_10B033882	1864.32	1573.93	3707.74	2737.83	2276.93	1956.67	1028.21	1429.33
MGAL_10B023925	1596.72	568.469	1239.67	866.304	1206.27	1209.04	1432.63	1743.43
MGAL_10B053330	326.625	272.075	560.414	566.61	226.896	232.714	296.407	336.313
MGAL_10B026783	108.219	86.6383	197.646	87.4108	63.8144	213.99	120.572	131.67
MGAL_10B076940	208.568	410.392	285.211	193.553	95.7216	382.506	252.867	76.1464
MGAL_10NCA035484	242.017	127.677	12.5092	160.774	115.221	131.069	211.002	209.403
MGAL_10B081968	188.891	284.234	253.938	646.216	460.882	928.18	705.013	628.208
MGAL_10NCA034235	27.5467	88.9182	31.2731	53.0709	85.9722	58.8472	95.4531	318.863
MGAL_10B087934	21.6438	28.8794	55.0407	99.8981	108.13	131.069	107.175	96.7694
MGAL_10B089058	911.008	369.353	637.971	499.491	352.752	473.452	341.622	253.028
MGAL_10NCA025952	226.276	68.3986	62.5462	109.264	26.5893	77.5712	68.6593	15.8638
MGAL_10B012786	1293.71	1795.08	1459.83	3729.01	1245.27	1671.79	2859.41	1476.13
MGAL_10B019146	605.043	567.709	221.414	237.258	486.585	732.915	604.537	405.321
MGAL_10NCA028936	303.013	3276.29	2.50185	40.5836	1496.98	1651.73	1148.79	1.58638
MGAL_10B093060	1859.4	2263.99	1452.32	1590.57	2077.51	2776.52	2489.32	2090.85
MGAL_10B033760	361.058	478.79	305.226	371.496	207.397	203.29	246.169	419.598
MGAL_10B056022	12104.8	14923.1	16841.2	11894.1	13083.7	8966.17	12125.9	4465.67
MGAL_10B028564	139.701	94.2381	122.591	149.847	122.311	189.916	105.501	44.4187
MGAL_10B065196	668.99	629.267	865.64	983.372	677.142	1110.07	815.538	579.03
MGAL_10B032312	153.474	148.957	242.679	112.385	152.446	98.9702	279.661	95.183
MGAL_10B048744	159.377	158.077	285.211	318.425	228.668	106.995	170.811	206.23
MGAL_10B092349B	6406.57	4740.03	6011.94	6505.86	5737.09	4632.88	7081.12	4045.28
MGAL_10B092349A	404.346	842.063	670.495	521.343	692.209	722.215	555.973	525.093
MGAL_10B007798	1450.14	1988.12	1090.81	718.018	1175.25	1575.5	1686.34	1291.32
MGAL_10B084143	895.267	873.983	545.403	746.114	1074.21	1396.28	988.024	988.317
MGAL_10B004323	12504.2	9008.1	8163.53	10353.5	15512.2	14647.6	16003.5	14380.6
MGAL_10B089751	1621.32	1347.45	1652.47	1340.82	1441.14	1744.02	1548.18	2312.95
MGAL_10B023037	141.669	0	145.107	143.604	223.351	625.92	0	356.936
MGAL_10B007185	219.389	18.2396	110.081	71.8018	170.172	205.965	37.6789	276.824
MGAL_10B024728	448.617	484.87	369.023	664.947	464.427	536.312	535.877	1176.3
MGAL_10NCA047372	5.90286	395.192	22.5166	176.383	2.65893	159.155	370.09	306.965
MGAL_10B072635	826.4	351.873	915.677	632.168	809.202	385.181	957.043	805.883
MGAL_10B088015	358.107	671.827	181.384	123.312	104.585	264.812	151.553	426.737
MGAL_10B069538	57.0609	107.918	117.587	103.02	72.6775	211.315	78.707	274.444
MGAL_10NCA064668	137.733	352.633	35.0259	190.431	274.757	377.157	97.1277	387.077
MGAL_10B092371B	5274.2	4931.54	4139.31	8288.42	5727.35	4931.12	3293.13	4521.98
MGAL_10B092371A	668.007	924.901	886.905	1504.72	1061.8	775.712	612.072	816.194
MGAL_10B090599	51.1581	144.397	50.037	234.136	28.362	16.0492	547.6	31.7277
MGAL_10B069767	82.64	69.9186	92.5684	24.9745	143.582	34.7733	286.359	145.947
MGAL_10B074469	623.735	531.989	412.805	824.159	758.683	647.319	611.235	655.176
MGAL_10B057547	428.941	770.625	267.698	273.159	220.692	212.652	386.836	386.284
MGAL_10B085447	2961.27	4463.39	2116.56	4297.18	1496.98	1203.69	3278.06	2103.54
MGAL_10B094391	1107.77	1028.26	1918.92	1571.83	2222.87	1188.98	783.72	1146.95
MGAL_10B061724	146.588	228.755	181.384	146.725	186.125	201.953	51.9131	429.91
MGAL_10B090853	669.974	275.874	215.159	174.822	173.717	108.332	248.681	111.047
MGAL_10B000185	234.147	182.396	25.0185	127.994	274.757	211.315	207.652	125.324
MGAL_10B060439	5159.1	3704.17	2814.58	4701.45	2536.62	2379.3	1910.74	3404.38
MGAL_10B010552	663.088	373.913	315.233	786.698	441.383	403.905	388.511	737.668
MGAL_10NCA002786	52.1419	22.7995	175.129	40.5836	93.0627	94.9579	265.427	29.3481
MGAL_10B010139	881.493	960.621	1396.03	780.454	944.808	805.136	1162.18	1427.74
MGAL_10B094596	129.863	37.9992	102.576	43.7054	480.381	188.578	793.768	6.34553
MGAL_10B058245	522.403	483.35	350.259	330.913	453.792	232.714	537.552	247.476
MGAL_10B028012	4368.11	6518.39	3592.65	5641.12	4098.3	3180.42	4015.73	3718.48
MGAL_10B076428	726.051	193.796	645.477	393.349	351.866	906.781	841.495	582.996
MGAL_10B034566	10978.3	10917.9	9261.84	8681.77	9615.59	10777.1	11341.3	9953.76
MGAL_10NCA033454	1497.36	5441.49	2548.13	3775.84	3411.41	3041.33	2673.53	2726.99
MGAL_10NCA033455	255.79	751.625	442.827	797.624	511.402	362.445	387.674	494.951
MGAL_10B046296	7149.34	8037.6	9209.3	13077.3	6329.15	7704.96	6924.54	7805.8
MGAL_10B018648	1362.58	623.188	2396.77	3078.11	563.694	1562.12	1167.21	1102.54
MGAL_10B039629	1637.06	2089.2	2205.38	2063.52	2339.86	1790.83	2650.08	3193.39
MGAL_10B022994	1302.56	986.46	820.606	1011.47	2958.51	1527.35	2382.98	912.17
MGAL_10B073736	17344.6	16212	11045.7	9034.54	17247.6	15674.7	15260.8	13888
MGAL_10NCA015749	97.3971	64.5987	87.5647	127.994	65.5871	106.995	79.5443	163.397
MGAL_10B045798	3917.53	5842.76	7125.26	10401.9	3173	4836.17	9434.79	5657.04
MGAL_10B038802	2783.2	3239.82	2012.74	2581.74	2020.79	2821.99	2854.38	2213
MGAL_10B009182	153.474	211.276	1050.78	237.258	35.4525	1393.61	480.615	1704.57
MGAL_10B018154	1407.83	1538.21	1468.59	1534.37	1682.22	1556.77	1323.78	1584
MGAL_10B048713	265.629	353.393	311.48	338.717	194.102	445.366	416.142	594.1
MGAL_10B070876	3662.72	3249.69	3204.87	4642.14	2518.9	2085.06	2650.92	2749.2
MGAL_10B003735	55.0933	63.8387	250.185	571.292	222.464	176.541	411.956	375.18
MGAL_10NCA031584	2120.11	2152.28	1906.41	2614.52	2080.17	2494.32	3964.65	1676.81
MGAL_10B091666	377.783	322.234	122.591	174.822	109.903	205.965	149.041	423.564
MGAL_10B060012	509.613	1703.13	1436.06	4094.26	336.798	1497.93	2000.33	773.362
MGAL_10NCA039088	688.667	218.116	331.495	56.1927	13.2947	123.044	576.068	348.211
MGAL_10B033898	464.358	712.106	554.159	443.298	584.966	1035.17	974.627	632.967
MGAL_10B005878	181.021	208.236	57.5425	162.334	177.262	78.9087	45.2146	69.8009
MGAL_10B031975	1361.59	1165.82	1371.01	1376.72	1088.39	625.92	977.976	585.375
MGAL_10B085265	261.693	237.115	347.757	468.272	280.074	331.684	224.399	244.303
MGAL_10B008414	283.337	211.276	75.0555	266.915	170.172	66.8718	247.843	276.031
MGAL_10B047242	511.581	168.717	277.705	56.1927	118.766	353.083	240.307	134.049
MGAL_10NCA056106	1457.02	1350.49	145.107	387.105	315.527	1374.88	2032.15	1560.21
MGAL_10NCA056107	749.663	592.788	77.5573	298.133	204.738	735.589	1048.31	915.343
MGAL_10B005259	3096.05	3310.49	1935.18	1710.76	1914.43	2662.83	4613.57	3306.82
MGAL_10B022895	973.971	1159.74	818.104	933.423	1306.42	1163.57	961.23	1136.64
MGAL_10B037664	2956.35	2675.15	2869.62	4164.5	3813.8	7285.01	5072.41	2430.34
MGAL_10B033739	129.863	129.197	127.594	149.847	159.536	168.517	95.4531	158.638
MGAL_10B080497	1066.45	921.102	1361.01	724.261	759.569	1378.9	2060.62	1519.75
MGAL_10B052578	5031.2	4774.98	3785.3	2912.65	5062.61	3862.51	4633.66	3713.72
MGAL_10B026628	255.79	214.316	202.65	749.236	472.404	457.403	199.279	341.866
MGAL_10B089968	29342.1	27433.2	39836.9	31694.2	37197.6	32119.8	25070.7	26868.6
MGAL_10B084628	186.924	185.436	182.635	218.527	118.766	88.2707	103.826	131.67
MGAL_10NCA062369	399.427	411.912	485.359	446.42	427.202	526.949	437.075	398.182
MGAL_10NCA062372	564.707	571.509	431.569	477.638	427.202	473.452	389.348	439.428
MGAL_10B036140	464.358	176.316	127.594	121.751	475.063	296.911	520.806	277.617
MGAL_10B058282	17.7086	25.8395	42.5314	309.06	214.487	215.327	13.3969	180.848
MGAL_10B050809	785.08	1348.97	2055.27	515.1	1209.82	928.18	756.927	975.626
MGAL_10B074586	316.787	25.8395	162.62	18.7309	184.353	147.118	199.279	28.5549
MGAL_10B066831	781.145	506.91	415.307	455.785	466.2	534.974	648.077	377.559
MGAL_10B040383	819.513	1373.29	955.706	699.287	1444.69	1487.23	811.352	801.123
MGAL_10B062574	466.326	489.43	160.118	449.542	434.293	973.653	611.235	571.098
MGAL_10B050574	173.15	44.0791	160.118	49.9491	136.492	42.7979	117.223	95.9762
MGAL_10B017630	431.892	527.429	946.95	277.842	990.01	258.125	713.387	491.779
MGAL_10B001715	3263.3	3283.13	3662.71	4323.72	5019.18	3102.85	2045.54	2317.71
MGAL_10B087245	4676.05	7605.17	3994.2	3156.16	3251.88	7272.97	6168.45	5902.14
MGAL_10B058219	22293.1	20403.3	27526.6	24815.3	24187.4	23310.2	19993.2	23699.8
MGAL_10NCA011835	121.009	63.8387	90.0665	88.9718	77.1091	329.009	94.6158	54.7302
MGAL_10B021095	61.98	95.7581	256.439	165.456	74.4502	123.044	104.664	106.288
MGAL_10B085321	1633.12	672.587	2291.69	1292.43	1487.23	1167.58	740.18	1215.17
MGAL_10NCA026342	281.369	199.116	95.0702	134.238	186.125	106.995	159.089	101.529
MGAL_10NCA019060	352.204	94.2381	137.602	0	464.427	354.42	563.508	90.4238
MGAL_10B083253	89.5267	6.83986	0	0	120.538	96.2953	129.783	45.2119
MGAL_10B029083	146.588	206.716	112.583	274.72	106.357	216.665	132.295	447.36
MGAL_10B033370	574.545	293.354	728.038	452.663	576.103	628.595	349.995	356.936
MGAL_10B091297	481.083	510.71	415.307	447.981	228.668	279.524	355.019	279.203
MGAL_10B004419	442.714	241.675	360.266	515.1	228.668	219.339	279.661	312.517
MGAL_10B010833	2695.64	4835.02	1966.45	1910.55	3492.95	4135.35	4399.22	3009.37
MGAL_10B088496	116.09	149.717	177.631	65.5581	126.743	120.369	82.8935	87.2511
MGAL_10B046851	129.863	215.076	213.908	249.745	180.808	403.905	236.121	188.78
MGAL_10B037976	82.64	174.797	25.0185	78.0454	147.128	157.817	177.509	144.361
MGAL_10NCA031600	286.289	250.035	477.853	249.745	572.557	357.095	217.7	347.418
MGAL_10B094280	2199.8	2380.27	4073.01	1871.53	3352.92	2331.15	2361.21	2844.38
MGAL_10B048997	82.64	94.2381	75.0555	26.5354	257.03	74.8964	66.9847	95.183
MGAL_10B029772	1204.18	554.029	989.481	1331.45	906.697	1215.73	982.163	705.94
MGAL_10B084812	305.965	316.154	308.978	151.408	260.576	259.462	208.49	326.795
MGAL_10NCA072483	123.96	120.838	210.155	42.1445	184.353	82.921	111.362	77.7328
MGAL_10B016218	54001.3	55702.3	57855.2	56361.3	57801.7	43116.2	44141.2	46715.8
MGAL_10B043459	214.47	364.793	339	224.771	290.71	211.315	220.212	245.889
MGAL_10B089678	6912.24	2489.71	4620.91	5366.4	4846.35	5301.59	4581.75	4837.67
MGAL_10B020041	1052.68	525.909	617.957	614.998	1225.77	506.888	900.944	1122.37
MGAL_10B083464	592.253	408.872	580.429	1011.47	536.218	381.169	334.923	419.598
MGAL_10B070252	560.771	396.712	407.801	315.303	269.439	452.053	336.598	304.586
MGAL_10B072804	141.669	133.757	97.5721	140.482	155.991	291.561	122.247	133.256
MGAL_10B027534	405.329	296.394	422.812	334.034	865.04	310.285	852.38	307.758
MGAL_10B010948	817.546	697.666	925.684	543.196	616.873	803.799	668.172	1330.98
MGAL_10B010660	105.268	145.917	112.583	73.3627	134.719	123.044	90.4293	103.908
MGAL_10NCA062385	41.32	62.3188	107.579	65.5581	163.968	60.1846	142.342	135.636
MGAL_10NCA062386	38.3686	56.2389	85.0628	56.1927	153.332	53.4974	133.969	117.392
MGAL_10NCA065579	196.762	217.356	322.738	82.7281	27.4757	44.1354	279.661	77.7328
MGAL_10B072821	827.384	1402.93	1052.03	357.448	256.144	76.2338	1263.5	274.444
MGAL_10B046392	19.6762	24.3195	22.5166	24.9745	65.5871	58.8472	341.622	291.101
MGAL_10NCA070286	43.2876	77.5184	210.155	21.8527	437.838	64.1969	319.852	75.3532
MGAL_10B041235	120.025	3.03994	5.0037	399.592	200.306	240.738	15.0715	220.507
MGAL_10B092445	66.899	69.9186	57.5425	134.238	106.357	90.9456	271.288	166.57
MGAL_10NCA002828	644.395	465.871	426.565	81.1672	398.84	492.176	341.622	303.792
MGAL_10B009992	1208.12	1130.86	956.957	524.465	1207.16	1405.64	319.014	828.885
MGAL_10B020169	1967.62	2108.2	1170.87	799.185	1061.8	1067.27	1927.48	1908.42
MGAL_10B083918	2111.25	2594.59	3455.05	2356.97	2136.9	2213.46	1371.51	1791.03
MGAL_10B053486	362.042	257.635	325.24	540.074	515.833	382.506	293.895	329.968
MGAL_10B019930	641.444	1006.22	420.311	499.491	462.655	371.807	454.658	755.118
MGAL_10B083939	167.248	183.156	47.5351	15.6091	82.427	203.29	37.6789	198.298
MGAL_10B056864	350.236	584.428	240.177	216.966	516.72	347.733	325.713	632.967
MGAL_10B074024	3208.2	3392.57	3541.37	3507.36	3946.75	2503.68	3765.37	3047.44
MGAL_10NCA002843	4822.63	4083.4	4690.97	2873.63	6369.03	2851.41	3533.44	4812.29
MGAL_10NCA002844	4820.67	4080.36	4690.97	2867.39	6363.72	2848.74	3531.77	4805.95
MGAL_10NCA002845	4584.55	3868.32	4288.17	2720.66	6088.07	2363.25	3268.01	4608.44
MGAL_10NCA002846	3539.75	2721.51	3526.36	1653	4593.75	2145.25	2749.72	3670.1
MGAL_10NCA002848	141.669	100.318	298.971	54.6318	92.1764	489.501	113.037	74.56
MGAL_10B057619	186.924	148.957	198.897	103.02	274.757	189.916	113.874	218.921
MGAL_10B025785	468.293	139.837	667.994	224.771	251.712	679.417	583.604	428.323
MGAL_10B081401	328.592	379.992	372.775	121.751	290.71	716.865	214.351	552.854
MGAL_10B044156	326.625	483.35	380.281	103.02	288.938	716.865	212.676	548.095
MGAL_10B054929	2388.69	2868.18	4771.02	3246.69	2744.02	2673.53	2864.43	2589.77
MGAL_10B060062	1674.44	2382.55	3037.24	1269.02	2083.72	2222.82	1969.35	2205.07
MGAL_10B062868	912.975	978.86	1411.04	1401.7	1244.38	2180.02	1981.91	935.966
MGAL_10B037470	905.105	942.381	873.145	1367.36	1614.86	1515.31	1282.76	553.648
MGAL_10NCA015094	2762.54	983.42	3708.99	2700.37	1547.5	2551.83	1212.42	1766.44
MGAL_10B036847	208.568	3.03994	172.628	140.482	242.849	147.118	0	260.96
MGAL_10B092795	480.099	486.39	688.008	1027.08	595.601	415.942	426.19	502.09
MGAL_10B081734	495.84	567.709	504.122	900.644	87.7448	409.255	590.302	613.93
MGAL_10B066072	4003.12	4760.54	4708.48	4998.03	6860.94	4414.87	4940.12	3896.16
MGAL_10NCA015762	963.149	501.59	850.628	24.9745	31.9072	278.187	86.2427	406.114
MGAL_10NCA015763	1272.07	762.265	934.44	327.791	308.436	231.376	383.487	855.854
MGAL_10B012703	4498.96	3543.05	3920.4	3663.45	1763.76	3506.76	3286.43	3747.04
MGAL_10B008475	8285.64	7611.25	7037.7	8163.55	4118.69	7755.79	7322.26	6216.24
MGAL_10B073871	1024.15	574.549	749.304	647.777	527.355	563.06	730.97	445.774
MGAL_10NCA015767	634.557	1130.1	1243.42	1222.19	1207.16	1792.16	2475.92	1883.83
MGAL_10NCA015768	142.652	278.154	285.211	160.774	321.731	534.974	639.703	359.316
MGAL_10NCA015770	419.103	721.226	796.839	718.018	574.33	851.946	1168.04	856.647
MGAL_10NCA015769	113.138	218.876	282.709	112.385	167.513	239.401	367.578	171.329
MGAL_10NCA015772	165.28	237.115	138.853	318.425	116.107	199.278	277.149	341.866
MGAL_10NCA015773	140.685	212.036	464.093	270.037	278.302	378.494	455.496	280.79
MGAL_10NCA015774	105.268	137.557	355.262	204.479	214.487	296.911	330.737	185.607
MGAL_10NCA015775	693.586	393.672	943.197	558.805	832.247	1703.89	888.384	686.111
MGAL_10NCA015776	823.448	392.152	691.761	369.935	843.769	1869.73	714.224	680.558
MGAL_10NCA015777	1232.71	540.349	371.524	474.516	413.907	993.714	481.452	575.857
MGAL_10NCA015779	592.253	630.027	810.599	418.323	504.311	513.575	365.066	1319.87
MGAL_10NCA015780	157.41	122.358	243.93	117.068	101.04	179.216	70.3339	306.965
MGAL_10B042624	836.238	1108.82	519.134	455.785	937.718	930.855	705.851	767.016
MGAL_10B060792	9735.78	17134.6	13915.3	14568	9663.45	11872.4	8481.93	12178.7
MGAL_10B081122	196.762	3.03994	150.111	0	194.989	0	307.292	454.499
MGAL_10B041888	194.794	171.757	150.111	359.009	203.852	173.867	182.533	161.811
MGAL_10B089633	1009.39	1150.62	1369.76	1779.44	1426.96	1235.79	1399.14	1649.84
MGAL_10B023159	5322.41	3159.26	7237.85	7793.61	6179.36	6293.97	5646.81	3408.34
MGAL_10B049152	19.6762	24.3195	275.203	199.796	62.9281	26.7487	43.54	6.34553
MGAL_10B092295	66.899	48.639	210.155	81.1672	47.8608	187.241	26.7939	230.026
MGAL_10NCA031607	76.7371	100.318	165.122	24.9745	78.8817	78.9087	135.644	102.322
MGAL_10B071520	3350.85	3644.89	3400.01	3817.98	2639.44	3268.69	3504.97	3525.74
MGAL_10B067277	467.309	596.588	359.015	181.065	227.782	516.25	587.79	553.648
MGAL_10B002736	23.6114	85.1183	42.5314	15.6091	23.0441	50.8225	149.041	293.481
MGAL_10B078651	1187.46	1373.29	1160.86	1153.51	1125.62	1104.72	1317.09	1542.76
MGAL_10B066241	861.817	1068.54	795.588	686.8	774.636	813.161	877.499	1139.02
MGAL_10B047897	1324.21	1301.09	1582.42	1667.05	1216.02	1299.99	1384.07	1223.1
MGAL_10B055302	279.402	168.717	302.724	485.442	406.817	185.903	227.748	212.575
MGAL_10B067178	1282.89	3464.01	7435.49	5375.77	2332.77	4501.81	671.521	1108.88
MGAL_10B008399	1723.63	1558.73	1632.46	764.845	1056.48	989.702	1675.45	1759.3
MGAL_10B003478	453.536	782.024	502.872	449.542	437.838	647.319	660.636	668.66
MGAL_10B087818	3079.32	7688.01	6552.34	5918.96	5298.37	5807.14	5869.53	2106.72
MGAL_10B076172	1539.66	1559.49	1238.41	1298.68	2159.94	2800.59	1650.33	1587.97
MGAL_10B065445	11639.4	11010.7	12713.1	15360.9	12083.1	7207.44	11744.9	8979.72
MGAL_10B059876	368.929	364.033	323.989	280.963	389.091	381.169	324.038	354.557
MGAL_10NCA052759	151.507	144.397	180.133	134.238	111.675	160.492	127.271	250.649
MGAL_10B029953	242.017	194.556	188.89	171.7	127.629	320.984	283.01	172.123
MGAL_10B015355	304.981	212.796	197.646	318.425	434.293	393.206	160.763	303.792
MGAL_10B003136	791.967	760.745	1180.87	824.159	1459.76	1076.64	778.697	1096.19
MGAL_10NCA055308	186.924	208.996	215.159	117.068	345.662	287.549	250.355	414.046
MGAL_10B075916	88.5428	191.516	115.085	95.2154	113.448	270.162	137.319	131.67
MGAL_10B007054	497.808	395.192	683.005	508.856	1290.47	687.442	368.416	555.234
MGAL_10B013047	198.73	115.518	151.362	123.312	122.311	108.332	154.065	196.711
MGAL_10B042465	270.548	215.076	300.222	271.598	241.963	211.315	439.587	276.031
MGAL_10B025268	810.659	831.423	1253.43	1314.28	1075.98	839.909	1018.17	719.425
MGAL_10NCA060001	116.09	85.1183	166.373	126.434	179.921	159.155	135.644	156.259
MGAL_10NCA060002	112.154	82.0784	158.867	123.312	173.717	152.468	127.271	152.293
MGAL_10B047075	475.18	380.752	298.971	206.04	452.905	960.279	291.383	847.922
MGAL_10B022700	1816.11	4309.11	1476.09	4567.22	5039.57	6149.53	7358.26	2585.8
MGAL_10B070038	1223.86	1903	1205.89	1317.41	826.042	1586.2	691.617	636.14
MGAL_10B061025	872.639	535.789	632.968	561.927	721.458	1134.15	490.663	1319.08
MGAL_10B077023	135.766	112.478	180.133	127.994	72.6775	160.492	133.969	388.664
MGAL_10B092735	326.625	151.997	130.096	471.394	402.385	96.2953	309.804	72.9736
MGAL_10B043863	21612.3	26373	30202.3	30746.8	34098.2	33155	29588.8	31080.4
MGAL_10B086046	23820	24979.2	22758.1	23596.2	23636.2	20446.7	21127	22096.7
MGAL_10B090789	79.6886	532.749	60.0444	117.068	85.0859	90.9456	136.481	167.363
MGAL_10B006182	2063.05	1070.82	1559.9	733.627	2622.6	3068.08	1530.6	2903.87
MGAL_10NCA002857	1460.96	845.863	878.149	132.677	2571.19	2046.28	1852.13	2556.46
MGAL_10B093534	13638.5	16707.5	12962.1	10305.1	10139.4	17484.3	12511.1	11727.3
MGAL_10B055684	259.726	321.474	280.207	213.844	681.574	382.506	289.709	478.294
MGAL_10B059488	182.005	182.396	145.107	65.5581	295.142	168.517	137.319	238.751
MGAL_10B045517	14196.4	14400.2	18319.8	23872.5	14657.8	14662.3	14266.1	15155.5
MGAL_10B083572	8550.29	7164.38	6270.88	5928.33	4771.9	4049.75	6381.13	3336.96
MGAL_10NCA007755	196.762	183.156	180.133	32.7791	208.283	164.505	159.089	195.918
MGAL_10NCA007757	258.742	104.878	394.041	215.405	283.62	24.0738	255.379	151.5
MGAL_10B067276	310.884	899.822	320.237	68.68	235.759	334.359	606.211	414.046
MGAL_10B090030	2629.72	4254.39	3680.22	3896.03	2403.68	3529.49	2969.93	6474.03
MGAL_10B014844	735.889	974.301	1063.29	1601.49	311.982	564.398	313.153	870.924
MGAL_10B072320	828.368	740.985	945.699	714.896	1061.8	1294.64	1775.09	761.464
MGAL_10B077031	143.636	232.555	527.89	121.751	216.26	141.768	549.274	195.125
MGAL_10B028402	245.952	303.234	255.189	274.72	219.805	163.167	198.442	245.889
MGAL_10B032936	143.636	835.983	372.775	351.204	443.156	576.435	378.463	169.743
MGAL_10B060126	322.689	25.0795	186.388	132.677	37.2251	0	261.24	138.809
MGAL_10B078530	274.483	316.154	410.303	388.666	235.759	211.315	529.179	464.017
MGAL_10B001435	80.6724	94.2381	160.118	85.8499	131.174	171.192	170.811	167.363
MGAL_10B066406	93.4619	33.4393	103.827	29.6573	79.768	104.32	133.132	152.293
MGAL_10B087017	88.5428	109.438	127.594	193.553	60.2692	58.8472	68.6593	136.429
MGAL_10B049284	141.669	281.194	155.115	271.598	248.167	347.733	261.24	125.324
MGAL_10B054636	242.017	361.753	382.783	290.329	327.935	402.568	386.836	479.088
MGAL_10B079365	259.726	179.356	155.115	549.44	53.1787	58.8472	200.954	326.002
MGAL_10B062882	242.017	253.835	230.17	152.969	278.302	452.053	375.114	212.575
MGAL_10B045586	431.892	556.309	260.192	31.2182	670.052	536.312	316.502	483.847
MGAL_10B069087	2813.69	1441.69	1768.81	4027.14	2617.28	1678.48	3210.24	2631.81
MGAL_10B092978	26726.2	28932.6	28588.6	24918.3	24752	26513.3	28327.8	28156.7
MGAL_10B014556	18763.2	15452.8	25956.7	18540.5	16576.7	14208.9	14531.5	18970
MGAL_10B089379	1489.49	1130.1	2094.05	1913.67	1444.69	956.266	1250.1	1368.26
MGAL_10B020545	181.021	202.156	285.211	727.383	216.26	144.443	122.247	69.8009
MGAL_10B033841	243.985	92.7181	130.096	103.02	241.077	406.58	194.255	23.7957
MGAL_10B011204	714.246	611.028	605.447	546.318	830.474	1096.7	695.803	555.234
MGAL_10B087430	77955.1	93811.8	73352.9	65570.6	90293.9	70703.5	78342.7	80151.2
MGAL_10B007547	1772.82	4546.23	636.72	2066.64	4247.2	3429.18	3315.74	3825.56
MGAL_10NCA047402	0	100.318	57.5425	48.3881	122.311	85.5959	116.386	52.3506
MGAL_10B081009	122.976	63.8387	250.185	156.091	171.944	337.034	98.8024	182.434
MGAL_10B034601	2691.7	4556.87	2092.8	3758.67	1616.63	2674.87	2257.38	5473.02
MGAL_10B013023	1005.45	1487.29	1816.34	2044.79	1611.31	1008.43	1157.16	1467.4
MGAL_10B030610	116.09	252.315	30.0222	46.8272	127.629	200.615	18.4208	103.115
MGAL_10B034467	1107.77	978.86	385.285	789.819	689.55	829.21	753.577	793.191
MGAL_10NCA064621	2757.62	12383.2	10542.8	6541.77	15303.9	13303.5	11903.2	9066.18
MGAL_10B089287	8723.44	15167.8	16576	10960.7	16959.6	13922.7	15914.7	11048.4
MGAL_10B026501	314.819	193.036	122.591	262.233	168.399	312.96	169.136	107.081
MGAL_10B042201	403.362	398.992	811.85	805.429	392.636	369.132	296.407	273.651
MGAL_10B019113	206.6	190.756	231.421	121.751	258.803	362.445	198.442	244.303
MGAL_10B023345	345.317	478.03	460.34	602.511	907.583	847.934	466.381	489.399
MGAL_10B075530	240.049	360.233	65.0481	140.482	56.7239	77.5712	188.394	95.183
MGAL_10NCA000353	636.525	409.632	1690	207.601	705.504	323.659	792.931	490.192
MGAL_10NCA000354	578.48	471.951	382.783	74.9236	892.516	695.466	649.751	57.1098
MGAL_10B018624	1086.13	1335.29	1264.68	1109.81	1525.34	1013.78	1695.55	796.364
MGAL_10B074084	116.09	24.3195	220.163	127.994	127.629	77.5712	154.902	72.9736
MGAL_10B040526	322.689	294.874	25.0185	99.8981	46.0882	2.67487	509.083	118.979
MGAL_10B037571	183.972	368.593	370.274	318.425	306.664	316.972	330.737	245.889
MGAL_10B018387	1752.16	2761.78	2430.55	1011.47	2350.5	3232.58	2193.75	1982.19
MGAL_10B067014	31.4819	109.438	198.897	74.9236	140.037	98.9702	83.7308	190.366
MGAL_10B059258	289.24	386.072	450.333	540.074	278.302	532.299	147.366	201.471
MGAL_10NCA73951	241.033	440.031	216.41	263.793	506.084	2.67487	459.682	23.7957
MGAL_10B049337	333.511	427.871	371.524	1283.07	251.712	732.915	1385.75	0
MGAL_10NCA009989	231.195	278.914	158.867	179.504	235.759	473.452	540.064	275.237
MGAL_10NCA009990	224.309	113.998	95.0702	210.723	180.808	316.972	170.811	131.67
MGAL_10NCA009991	123.96	104.878	32.524	81.1672	69.1323	236.726	412.793	111.047
MGAL_10B043270	972.988	909.702	571.672	1921.48	848.2	1802.86	1727.37	1038.29
MGAL_10NCA009992	169.215	67.6386	1.25092	93.6545	23.0441	86.9333	293.895	152.293
MGAL_10B011483	409.265	522.87	90.0665	260.672	1.77262	744.951	1128.69	463.224
MGAL_10B050568	128.879	96.5181	20.0148	37.4618	0	132.406	254.542	84.0783
MGAL_10B020973	387.621	297.154	68.8008	174.822	0	436.004	787.907	340.279
MGAL_10NCA009993	124.944	152.757	42.5314	90.5327	141.81	358.433	293.895	149.12
MGAL_10NCA009994	155.442	13.6797	25.0185	79.6063	58.4966	123.044	158.251	59.4894
MGAL_10B054695	150.523	48.639	28.7713	312.182	77.1091	151.13	166.624	65.8349
MGAL_10B053064	698.505	169.477	188.89	708.652	119.652	112.345	1328.81	301.413
MGAL_10B083394	1662.64	956.821	385.285	1070.78	700.186	1392.27	1708.95	1116.81
MGAL_10B084909	214.47	452.951	220.163	209.162	272.984	200.615	244.494	168.157
MGAL_10B063263	268.58	980.38	384.034	49.9491	0	604.521	898.432	271.271
MGAL_10B046031	118.057	174.037	112.583	59.3145	1.77262	101.645	183.37	75.3532
MGAL_10B084745	795.902	732.625	1072.04	355.887	368.706	366.457	1541.48	547.302
MGAL_10NCA017807	186.924	776.704	317.735	159.213	280.074	13.3744	907.642	138.809
MGAL_10B067876	361.058	410.392	592.938	383.983	703.731	227.364	1216.61	366.454
MGAL_10B031182	70.8343	36.4793	96.3212	71.8018	190.557	77.5712	185.882	141.188
MGAL_10NCA017810	99.3648	98.798	95.0702	28.0963	235.759	8.02461	163.275	118.979
MGAL_10B068097	94.4457	47.1191	15.0111	93.6545	88.6312	160.492	96.2904	81.6987
MGAL_10NCA017812	98.3809	262.955	80.0591	15.6091	47.8608	88.2707	588.628	58.6962
MGAL_10B002368	0	80.5584	328.993	221.649	3.54525	0	147.366	139.602
MGAL_10B004130	194.794	171.757	77.5573	204.479	0	0	68.6593	96.7694
MGAL_10B086107	62.9638	160.357	37.5277	46.8272	116.107	10.6995	187.557	58.6962
MGAL_10NCA017817	44.2714	39.5192	83.8119	210.723	147.128	74.8964	428.702	61.0757
MGAL_10B048740	65.9152	285.754	120.089	65.5581	69.1323	17.3867	128.945	117.392
MGAL_10B024749	364.009	398.232	347.757	221.649	512.288	976.328	393.535	385.491
MGAL_10B065444	92.4781	98.798	165.122	227.893	138.265	123.044	175.835	69.8009
MGAL_10B063286	326.625	186.956	107.579	274.72	57.6103	278.187	75.3577	328.381
MGAL_10B088223	757.533	4.55991	798.09	6.24363	10.6357	876.02	1023.19	310.931
MGAL_10B082003	323.673	0	52.5388	0	265.893	112.345	38.5162	187.193
MGAL_10B045751	267.596	134.517	92.5684	355.887	699.3	358.433	422.003	445.774
MGAL_10B063620	568.642	592.788	945.699	718.018	593.829	909.456	668.172	234.785
MGAL_10B074721	3386.27	3538.49	2029	1258.09	1877.21	4263.74	3952.09	3272.71
MGAL_10B064385	12596.7	12831.6	12336.6	20329.3	14150.9	14849.5	15616.6	13057.5
MGAL_10B005486	125.928	101.838	155.115	53.0709	125.856	80.2461	78.707	95.183
MGAL_10B016101	387.621	516.79	339	327.791	304.891	338.371	396.884	579.823
MGAL_10B082188	349.252	320.714	280.207	165.456	313.754	358.433	272.962	222.094
MGAL_10B018934	25.579	25.0795	90.0665	68.68	171.944	116.357	49.4012	71.3872
MGAL_10B075057	5562.46	7715.37	11803.7	17866.2	8614.06	5507.56	5911.4	6050.46
MGAL_10B092503	749.663	825.343	1573.66	1676.42	483.926	853.284	729.295	625.828
MGAL_10NCA046627	70.8343	129.197	220.163	109.264	101.04	89.6082	66.1473	92.0102
MGAL_10B073175	28363.2	37508.3	20892.9	20085.8	39843.2	45654.7	31867.9	29165.7
MGAL_10B051618	133.798	104.118	103.827	143.604	79.768	80.2461	100.477	156.259
MGAL_10B008365	1743.31	2539.87	2922.16	2422.53	2294.66	2343.19	3119.81	1835.45
MGAL_10B029446	7514.34	5978.8	6941.38	5166.61	5835.48	3560.25	5493.58	3134.69
MGAL_10B085667	159.377	302.474	381.532	678.995	185.239	513.575	267.939	176.089
MGAL_10B003955	76.7371	83.5983	152.613	380.862	120.538	141.768	83.7308	212.575
MGAL_10B021384	100.349	51.679	367.772	611.876	529.128	211.315	113.874	323.622
MGAL_10B004223	186.924	171.757	60.0444	146.725	170.172	136.418	123.922	161.811
MGAL_10B049813	322.689	445.351	342.753	127.994	425.43	500.201	360.043	296.654
MGAL_10B041387	249.888	155.037	202.65	262.233	223.351	211.315	221.049	153.879
MGAL_10B032266	1701.99	1839.16	542.901	2307.02	2093.47	1361.51	2166.95	2508.07
MGAL_10B008466	232.179	194.556	232.672	181.065	274.757	211.315	205.978	288.722
MGAL_10B022854	23772.8	28393.8	23479.8	40102.8	36700.4	24828.1	24853.8	25464.6
MGAL_10NCA002900	287.272	60.7988	66.299	120.19	154.218	78.9087	224.399	60.2826
MGAL_10B022355	1296.66	1143.02	2294.19	1186.29	1496.09	1439.08	1267.68	2215.38
MGAL_10B064009	182.989	8.35983	16.262	6.24363	194.102	485.489	269.613	121.358
MGAL_10B087876	143.636	329.833	216.41	179.504	92.1764	175.204	287.197	362.489
MGAL_10B018418	109.203	131.477	115.085	235.697	173.717	141.768	178.347	143.568
MGAL_10B013781	29.5143	0.759985	97.5721	191.992	76.2228	101.645	3.34923	260.167
MGAL_10B032693	1027.1	427.111	207.653	184.187	909.356	1043.2	1637.77	567.132
MGAL_10B059280	3195.41	4192.08	3386.25	4102.07	3212.88	3427.85	3772.07	3591.57
MGAL_10NCA015816	427.957	318.434	605.447	405.836	362.501	393.206	462.194	582.996
MGAL_10NCA015817	184.956	101.078	166.373	146.725	135.606	141.768	211.002	204.643
MGAL_10NCA015818	493.872	467.391	664.241	277.842	623.077	698.141	380.975	886.788
MGAL_10B046952	7852.77	6214.4	12550.5	11227.6	9043.04	6835.63	6557.8	8115.14
MGAL_10B073025	403.362	1061.7	1644.97	1549.98	751.592	631.269	1478.69	1057.32
MGAL_10B061948	2445.75	3008.02	3162.34	3892.9	2449.77	3656.55	2553.79	3363.13
MGAL_10B078980	625.703	554.789	601.695	307.499	560.149	391.869	678.22	490.192
MGAL_10B075418	9735.78	4798.54	5906.86	6613.57	4321.66	3102.85	6531	4507.71
MGAL_10B071257	1694.12	1087.54	1208.39	699.287	1044.96	869.333	1127.85	629.794
MGAL_10B064094	11267.6	6335.23	8815.26	10058.5	6584.41	7410.73	9043.77	7049.09
MGAL_10B021696	12595.7	16949.9	13824	26718.1	16932.1	12805.9	14904.9	16268.4
MGAL_10B069098	814.594	951.501	793.086	605.632	604.464	802.461	773.673	828.092
MGAL_10B065228	628.654	834.463	462.842	1005.22	827.815	165.842	416.979	1299.25
MGAL_10B004734	2585.45	2589.27	4953.66	2129.08	2612.85	3726.09	3131.53	4184.88
MGAL_10B068375	1243.54	1550.37	1509.87	1030.2	1767.31	1760.06	1971.02	1577.66
MGAL_10B041777	1180.57	936.301	1015.75	1039.56	1046.73	974.99	910.991	918.516
MGAL_10B021261	348.269	347.313	341.502	476.077	248.167	243.413	533.365	444.98
MGAL_10B007886	2845.18	2374.95	2799.57	2419.41	2974.46	2113.15	3628.89	2390.68
MGAL_10B051037	159.377	142.877	47.5351	190.431	311.982	115.019	108.85	47.5915
MGAL_10B055148	2900.27	1276.77	1771.31	683.678	1108.78	345.058	1095.2	426.737
MGAL_10B059085	102.316	127.677	82.561	96.7763	122.311	163.167	108.85	120.565
MGAL_10B092029	59.0286	92.7181	81.3101	121.751	72.6775	427.979	83.7308	126.117
MGAL_10NCA031634	47.2229	357.953	82.561	71.8018	194.989	208.64	88.7547	55.5234
MGAL_10B001881	114.122	715.906	482.857	346.522	179.035	163.167	93.7785	1440.44
MGAL_10B080381	5100.07	4426.15	4978.68	2147.81	5434.86	8136.96	5804.22	3217.18
MGAL_10B035336	96.4133	331.353	132.598	1623.34	1010.4	1705.23	1063.38	1012.11
MGAL_10B074246	558.804	556.309	701.768	730.505	595.601	452.053	519.131	369.627
MGAL_10B055906	59.0286	180.876	202.65	483.881	327.935	302.26	231.097	439.428
MGAL_10B074874	710.31	2002.56	232.672	452.663	694.868	1995.45	1883.94	320.449
MGAL_10B044550	65.9152	143.637	120.089	87.4108	72.6775	133.744	280.498	119.772
MGAL_10B063813	580.448	454.471	527.89	202.918	235.759	601.846	626.307	536.197
MGAL_10B024109	9801.69	11091.2	7015.18	8082.38	9582.8	11729.3	12372.9	9171.67
MGAL_10B087584	4571.76	3164.58	3708.99	4240.99	3526.63	3755.52	3682.48	3243.36
MGAL_10NCA036720	716.213	234.075	474.1	462.029	311.982	429.317	189.232	647.244
MGAL_10B032572	18238.8	18765.5	26180.6	24996.4	21307.8	14663.6	16770.4	11607.6
MGAL_10B086305	121.992	72.9585	192.642	68.68	35.4525	64.1969	70.3339	85.6647
MGAL_10B017884	8157.75	6967.54	7107.75	5847.16	7294.34	6227.1	7093.67	6026.67
MGAL_10B011243	507.646	367.833	387.787	571.292	397.068	612.545	450.472	623.449
MGAL_10B033916	202.665	226.475	142.605	252.867	225.123	163.167	190.906	241.13
MGAL_10B014907	613.897	419.512	585.433	633.729	134.719	377.157	165.787	104.701
MGAL_10NCA054280	119.041	316.914	167.624	145.164	183.466	259.462	314.828	151.5
MGAL_10NCA054281	554.869	1366.45	641.724	811.672	917.332	1254.51	1342.21	1153.3
MGAL_10NCA054283	108.219	269.035	90.0665	112.385	179.035	227.364	252.867	306.172
MGAL_10NCA054284	236.114	661.947	237.676	371.496	345.662	516.25	567.695	423.564
MGAL_10B091110	251.855	268.275	147.609	221.649	194.989	264.812	247.843	282.376
MGAL_10B011262	9015.63	12137.7	7295.39	8032.43	9204.35	8983.55	11110.2	9912.51
MGAL_10B083858	24584.4	27934.8	30707.7	33932.6	28471.9	19527.9	27889.1	20273.2
MGAL_10B001934	5581.15	6703.83	7131.52	9986.69	6803.33	6491.91	5776.59	5242.2
MGAL_10B070411	598.156	755.425	446.58	554.122	678.915	863.983	835.634	729.736
MGAL_10B063795	732.938	830.663	709.274	565.049	1039.64	1496.59	921.039	842.369
MGAL_10B088400	317.77	379.232	168.875	307.499	224.237	224.689	214.351	234.785
MGAL_10B036650	172.167	205.956	429.067	318.425	283.62	238.063	449.634	120.565
MGAL_10B062398	1373.4	576.068	419.06	836.647	3158.81	5103.65	2401.4	1711.71
MGAL_10NCA067418	763.436	24.3195	933.189	268.476	906.697	24.0738	986.349	1453.92
MGAL_10B076325	548.966	50.159	197.646	112.385	519.379	147.118	602.862	354.557
MGAL_10B030281	521.419	103.358	65.0481	40.5836	220.692	24.0738	406.094	230.026
MGAL_10B092395	5095.15	4486.95	4948.66	5566.2	5005	4794.71	5790.82	3877.12
MGAL_10B072105	4380.9	2498.83	3314.95	4679.6	4119.58	1768.09	3612.15	1170.75
MGAL_10B014576	3615.5	3581.05	4143.06	4331.52	3225.29	2995.85	2959.05	3993.72
MGAL_10B048638	10040.8	8919.18	9364.42	14639.8	9125.46	8324.2	3047.8	8257.12
MGAL_10B012147	1103.83	521.35	467.846	1601.49	163.081	369.132	889.221	380.732
MGAL_10B053563	167.248	408.872	470.347	343.4	230.441	248.763	275.474	828.092
MGAL_10B092103	8753.94	3007.26	4700.97	7061.55	3216.42	2463.56	2970.77	912.963
MGAL_10B028898	12155	4128.24	6054.47	7692.15	4110.71	3223.22	3963.82	973.246
MGAL_10B012481	133.798	85.1183	57.5425	168.578	163.081	50.8225	163.275	381.525
MGAL_10B007381	2445.75	2573.31	2772.05	1667.05	1567.89	2376.62	2621.61	1223.89
MGAL_10NCA024994	1301.58	2190.28	1250.92	1309.6	1331.24	1572.82	1672.1	1688.7
MGAL_10NCA024993	192.827	649.027	186.388	376.179	344.775	326.334	413.63	240.337
MGAL_10B093219	2446.73	2900.86	2680.73	2583.3	2718.32	3986.89	2282.5	2952.26
MGAL_10B046886	283.337	305.514	135.1	174.822	181.694	197.94	263.752	81.6987
MGAL_10NCA041352	138.717	0	132.598	216.966	241.963	378.494	0	393.423
MGAL_10NCA041353	259.726	354.153	464.093	195.114	502.539	889.394	145.692	1190.58
MGAL_10NCA041354	91.4943	282.714	163.871	177.944	255.258	256.788	66.9847	319.656
MGAL_10NCA041355	165.28	395.192	238.927	216.966	397.068	390.531	124.759	418.805
MGAL_10B079374	1286.82	1998	1352.25	1712.32	1871.89	1895.15	1861.34	1771.99
MGAL_10B094213	1761.02	1032.06	3144.82	1859.04	2240.6	1685.17	1825.33	1910.8
MGAL_10B029938	563.723	614.068	880.651	1048.93	636.372	510.9	524.155	423.564
MGAL_10B025558	3175.74	4505.95	1897.65	2996.94	2355.82	1745.35	5640.11	4686.18
MGAL_10B092255A	3579.1	3092.38	6588.62	5327.38	4236.57	2090.41	2427.36	3579.67
MGAL_10B092255B	479.115	439.271	823.108	1062.98	575.216	950.916	929.412	880.443
MGAL_10B017782	316.787	331.353	560.414	568.171	1010.4	1107.4	511.595	1722.81
MGAL_10B019171	1306.5	1011.54	815.603	1155.07	1324.15	1334.76	1492.08	1130.3
MGAL_10B003180	7338.23	6192.36	6802.53	5038.61	6915.89	8056.71	6544.4	4982.83
MGAL_10B027274	2765.49	3403.21	3294.93	2603.59	3862.55	3378.36	3731.05	3133.11
MGAL_10B090855	303.997	338.193	307.727	285.646	278.302	299.585	331.574	363.282
MGAL_10NCA022665	340.398	465.111	312.731	196.674	296.028	433.329	438.749	729.736
MGAL_10NCA022669	69.8505	231.795	30.0222	46.8272	76.2228	153.805	143.18	310.138
MGAL_10B062484	364.009	1713.01	242.679	561.927	1012.17	1305.34	1669.59	477.501
MGAL_10B003497	123.96	139.837	100.074	265.354	60.2692	195.266	207.652	234.785
MGAL_10B065246	232.179	799.504	635.469	259.111	118.766	513.575	787.07	758.291
MGAL_10B048588	4191.03	3625.13	3417.52	3071.87	2915.97	3161.7	2841.82	3467.04
MGAL_10B081419	311.868	222.676	142.605	171.7	219.805	268.824	253.704	364.868
MGAL_10B006841	1438.33	1861.96	978.223	1086.39	1400.37	1166.24	905.13	891.547
MGAL_10B053433	3.93524	357.193	645.477	636.85	0	521.6	0	0
MGAL_10NCA031642	155.442	191.516	37.5277	1.56091	85.9722	41.4605	212.676	53.937
MGAL_10B083056	385.653	330.593	396.543	118.629	171.058	391.869	384.324	337.9
MGAL_10B078571	690.634	678.666	400.296	616.559	597.374	430.654	816.375	525.886
MGAL_10B054535	422.054	343.513	515.381	619.68	459.109	754.313	510.758	399.769
MGAL_10NCA034174	385.653	121.598	321.488	257.55	362.501	354.42	112.199	243.51
MGAL_10B039048	17.7086	53.1989	105.078	149.847	60.2692	272.837	470.567	31.7277
MGAL_10B016099	133.798	94.2381	347.757	271.598	152.446	219.339	180.859	0
MGAL_10B017633	15786.2	11056.3	14265.5	12477.9	10072	11705.2	9420.55	14006.2
MGAL_10NCA041325	60.9962	82.0784	67.5499	137.36	148.014	112.345	36.8416	185.607
MGAL_10B007052	128.879	28.8794	90.0665	146.725	90.4038	133.744	95.4531	241.923
MGAL_10B012304	1306.5	1155.18	1443.57	889.718	1150.43	988.365	1599.26	1288.14
MGAL_10NCA045422	92.4781	68.3986	110.081	84.289	184.353	85.5959	204.303	226.06
MGAL_10B067192	434.844	101.838	700.518	162.334	315.527	61.522	457.17	536.197
MGAL_10B029413	161.345	75.9985	132.598	184.187	260.576	96.2953	70.3339	92.0102
MGAL_10B015524	5127.61	4047.68	8680.16	5272.75	3835.96	3358.3	2492.67	4619.55
MGAL_10B079427	1338.96	2480.59	2481.83	1790.36	2468.38	1729.3	1854.64	2093.23
MGAL_10B025724	74.7695	82.0784	195.144	96.7763	136.492	123.044	102.989	99.9421
MGAL_10B018550	195.778	92.7181	60.0444	280.963	522.924	136.418	296.407	149.12
MGAL_10B076274	1241.57	1210.66	70.0518	393.349	35.4525	1760.06	200.954	985.144
MGAL_10B005887	1124.49	1137.7	505.373	652.46	563.694	1199.68	627.981	921.689
MGAL_10NCA052778	32.4657	43.3191	41.2805	31.2182	50.5198	390.531	139.83	75.3532
MGAL_10B078377	171.183	162.637	87.5647	146.725	132.06	159.155	125.596	141.188
MGAL_10B015599	2892.4	1258.53	2439.3	2141.57	2196.28	2543.8	2227.24	2349.43
MGAL_10B070063	226.276	344.273	260.192	206.04	194.102	247.426	401.908	358.523
MGAL_10B002301	854.93	1596.73	2072.78	2154.05	599.147	1872.41	2968.26	3643.92
MGAL_10B091129	411.232	972.021	369.023	271.598	276.529	802.461	1567.44	1318.28
MGAL_10B067340	783.112	738.705	1608.69	1532.81	1088.39	882.707	1075.1	382.318
MGAL_10B067313	737.857	729.585	557.912	440.176	661.188	644.644	785.395	580.616
MGAL_10B085166	490.921	246.235	177.631	162.334	176.376	50.8225	136.481	232.405
MGAL_10B019389	435.828	1199.26	1128.33	1376.72	616.873	660.693	737.669	740.841
MGAL_10B081676	168.231	241.675	983.226	433.932	277.416	415.942	574.393	104.701
MGAL_10NCA071366	6.88667	9.11982	116.336	99.8981	156.877	196.603	133.969	17.4502
MGAL_10B070807	11992.6	19838.6	9869.79	7907.56	20498.6	18108.9	13595.4	11978.8
MGAL_10NCA002927	220.373	75.9985	81.3101	106.142	325.276	251.438	168.299	73.7668
MGAL_10B010247	924.781	715.906	858.134	1403.26	1720.33	1451.12	1425.94	1155.68
MGAL_10B093575	4457.64	6921.18	4116.79	4896.57	4786.08	6791.5	6603.85	5618.97
MGAL_10B092009	1431.44	2497.31	2533.12	1637.39	2589.8	1794.84	2078.2	2400.2
MGAL_10B044304	3766.02	2678.95	4912.38	3803.93	3416.73	2574.56	3637.27	3176.73
MGAL_10B031399	732.938	785.064	821.857	437.054	812.748	913.468	1401.65	842.369
MGAL_10NCA002930	304.981	371.633	486.61	357.448	279.188	615.22	659.799	368.041
MGAL_10NCA002931	82.64	76.7585	143.856	68.68	42.543	147.118	180.859	74.56
MGAL_10NCA002932	87.559	75.9985	193.893	60.8754	70.0186	77.5712	150.715	83.2851
MGAL_10NCA002935	92.4781	49.399	81.3101	68.68	40.7703	69.5466	200.117	153.086
MGAL_10B000299	408.281	621.668	322.738	708.652	1325.92	387.856	395.209	618.689
MGAL_10B028071	311.868	7371.09	3652.7	1150.39	3453.07	4148.72	8719.73	5899.76
MGAL_10B031593	393.524	468.151	367.772	371.496	450.246	417.28	563.508	272.065
MGAL_10B034825	1576.06	908.182	1088.3	1258.09	1238.18	1369.53	1229.17	1108.09
MGAL_10B062732	1162.86	608.748	1155.85	1045.81	1219.56	876.02	663.148	678.972
MGAL_10B028567	153.474	96.5181	60.0444	74.9236	63.8144	80.2461	216.026	117.392
MGAL_10B036222	7151.31	5876.2	4724.74	8953.37	6011.85	7468.24	4565.84	7994.58
MGAL_10B062745	1581.97	1734.29	959.459	2018.25	1787.69	3090.81	1574.14	2735.72
MGAL_10B090769	2612.01	2388.63	2049.01	3455.85	3257.19	2973.12	3320.76	2161.45
MGAL_10B045351	2186.02	320.714	327.742	1087.95	311.982	361.108	372.602	616.31
MGAL_10NCA007813	230.211	51.679	75.0555	110.824	76.2228	64.1969	83.7308	82.4919
MGAL_10B008960	428.941	436.231	465.344	437.054	375.796	302.26	486.476	421.978
MGAL_10B012096	33557.7	25675.3	39781.9	57132.4	34752.3	32202.8	24149.6	23402.3
MGAL_10B069409	895.267	288.034	968.215	1571.83	1044.96	575.097	1162.18	579.03
MGAL_10B024853	789.015	227.235	989.481	1055.17	741.843	405.243	438.749	582.203
MGAL_10B076319	564.707	641.427	711.776	299.694	771.977	442.691	512.433	932
MGAL_10B077760	1258.29	1469.05	1245.92	2316.39	1653.86	1741.34	1930	1229.45
MGAL_10B035937	112.154	69.9186	91.3175	76.4845	53.1787	208.64	306.455	258.58
MGAL_10B093072	549.949	169.477	112.583	99.8981	118.766	267.487	98.8024	234.785
MGAL_10B080835	519.451	617.108	575.425	231.014	712.594	684.767	411.956	323.622
MGAL_10B015537	94.4457	127.677	122.591	181.065	171.944	64.1969	133.969	73.7668
MGAL_10B031761	291.208	252.315	650.481	277.842	386.432	968.303	422.003	274.444
MGAL_10NCA028985	590.286	183.916	357.764	493.247	544.195	863.983	694.966	703.561
MGAL_10B094517	141.669	113.998	470.347	321.547	141.81	304.935	61.9608	141.981
MGAL_10B052685	594.221	345.033	459.089	441.737	386.432	327.672	328.225	536.991
MGAL_10NCA034193	564.707	227.995	467.846	305.938	657.643	270.162	342.459	599.653
MGAL_10B053608	364.009	440.791	283.96	405.836	491.017	329.009	257.891	272.858
MGAL_10B065710	775.242	1205.34	562.916	234.136	1226.66	457.403	605.374	1552.28
MGAL_10B064058	243.985	218.876	402.798	433.932	317.3	401.231	423.678	450.533
MGAL_10B081828	1229.76	1141.5	1237.16	2182.15	1573.2	1180.96	1708.95	1416.64
MGAL_10B058115	4342.53	3865.28	4365.73	3429.31	3930.79	3780.93	4381.63	3998.48
MGAL_10B092569	182.005	158.837	162.62	173.261	124.97	116.357	221.049	220.507
MGAL_10B066979	41.32	106.398	97.5721	56.1927	92.1764	80.2461	72.0085	131.67
MGAL_10NCA054300	226.276	280.434	125.092	93.6545	93.949	62.8595	341.622	172.916
MGAL_10B014882	8567.01	10121.5	9989.88	5622.39	10371.6	6962.69	7454.55	9424.7
MGAL_10B035318	94.4457	264.475	522.886	477.638	276.529	213.99	197.605	513.195
MGAL_10B029542	779.177	325.273	775.573	1638.95	375.796	551.023	398.559	436.255
MGAL_10NCA065580	9.83809	22.7995	85.0628	74.9236	17.7262	109.67	179.184	60.2826
MGAL_10B087253	505.678	597.348	606.698	668.069	583.193	735.589	689.942	764.637
MGAL_10B078341	234.147	183.916	200.148	134.238	58.4966	80.2461	182.533	323.622
MGAL_10B048931	199.713	210.516	85.0628	107.703	85.0859	45.4728	91.2666	190.366
MGAL_10B009825	302.029	278.154	510.377	508.856	343.889	292.898	243.657	578.237
MGAL_10NCA002956	3314.45	5427.05	5273.9	5765.99	5166.31	2911.6	4160.58	2715.89
MGAL_10B038570	1036.94	642.947	828.112	749.236	1262.11	2522.4	1078.45	1667.29
MGAL_10B012944	287.272	533.509	412.805	371.496	306.664	197.94	68.6593	442.601
MGAL_10B046211	928.716	652.067	327.742	749.236	356.297	219.339	733.482	374.386
MGAL_10NCA002991	809.675	442.311	195.144	301.255	206.511	280.861	573.556	374.386
MGAL_10B061305	47.2229	57.7588	252.687	124.873	83.3133	61.522	70.3339	23.7957
MGAL_10B059960	336.463	214.316	210.155	171.7	170.172	144.443	239.47	223.68
MGAL_10B007202	5441.45	4445.91	4251.89	4134.85	3623.24	4249.03	3904.37	4547.37
MGAL_10B088803	751.63	978.86	1072.04	872.548	1003.3	735.589	1187.3	1050.98
MGAL_10B082488	4844.28	3299.09	2424.29	3340.34	3667.56	2963.76	6050.39	4072.25
MGAL_10B055901	226.276	104.878	205.152	112.385	37.2251	66.8718	90.4293	164.984
MGAL_10B061650	252.839	186.956	25.0185	87.4108	96.608	279.524	138.993	185.607
MGAL_10B060379	84.6076	293.354	155.115	134.238	170.172	24.0738	115.549	378.352
MGAL_10B059022	76.7371	103.358	102.576	37.4618	48.7471	200.615	313.153	165.777
MGAL_10B087098	70.8343	322.234	122.591	90.5327	191.443	33.4359	16.7462	79.3191
MGAL_10B065609	12297.6	15067.5	14022.9	24456.3	22804.8	13243.3	15159.5	8214.29
MGAL_10NCA058535	80.6724	35.7193	210.155	37.4618	78.8817	101.645	88.7547	155.466
MGAL_10B065722	303.997	761.505	1960.2	1253.41	424.543	1567.47	603.699	1482.47
MGAL_10B072769	6791.24	2107.44	12334.1	7075.6	4000.81	5932.86	2329.39	5547.58
MGAL_10B089450	1487.52	1529.09	1399.78	1108.24	2153.74	205.965	920.202	1383.33
MGAL_10B059656	259.726	93.4781	145.107	113.946	203.852	125.719	116.386	283.963
MGAL_10B025810	173.15	67.6386	200.148	335.595	101.04	240.738	162.438	149.12
MGAL_10NCA019171	1763.97	2036.76	1419.8	952.154	1345.42	1146.18	2048.89	1671.25
MGAL_10NCA019172	1763.97	2036.76	1419.8	952.154	1345.42	1146.18	2048.89	1671.25
MGAL_10B082120	1670.51	1950.12	1257.18	1437.6	1814.28	1471.18	1595.07	1461.06
MGAL_10B025937	765.404	310.834	559.163	522.904	452.905	112.345	292.221	390.25
MGAL_10B005064	987.745	1045.74	771.82	443.298	666.506	1538.05	1104.41	1659.36
MGAL_10NCA019178	190.859	252.315	207.653	252.867	210.942	53.4974	31.8177	166.57
MGAL_10NCA019181	141.669	190.756	150.111	151.408	163.968	34.7733	13.3969	122.945
MGAL_10B070334	996.599	842.063	520.384	458.907	732.093	755.651	795.443	592.514
MGAL_10B003333	883.461	2032.2	3860.35	3930.37	5215.94	6348.81	1671.27	419.598
MGAL_10B041593	3340.03	2572.55	3507.59	4426.74	3010.8	3433.2	2329.39	2311.36
MGAL_10B057887	2177.17	2553.55	2704.5	3574.48	3274.92	2402.03	1828.68	3605.85
MGAL_10B079550	4186.11	4803.86	4394.5	2438.14	4724.04	6093.35	3593.73	4436.32
MGAL_10B045310	582.415	182.396	256.439	629.046	436.065	227.364	715.061	492.572
MGAL_10B074662	466.326	1526.81	530.392	174.822	38.9977	112.345	113.874	225.266
MGAL_10B036839	269.564	362.513	180.133	330.913	171.944	286.211	190.906	250.649
MGAL_10B092307	334.495	1092.86	597.942	867.865	307.55	880.032	604.537	1445.19
MGAL_10NCA034218	15.741	7.59985	10.0074	12.4873	18.6125	620.57	1087.66	679.765
MGAL_10NCA034220	19.6762	1.51997	27.5203	12.4873	5.31787	537.649	445.448	276.031
MGAL_10B066384	371.88	258.395	471.598	340.278	427.202	326.334	377.626	446.567
MGAL_10B047895	2005	2080.84	2521.86	1857.48	2437.36	2002.14	3036.08	2782.52
MGAL_10B064634	299.078	287.274	459.089	738.31	519.379	367.795	254.542	388.664
MGAL_10NCA072991	93.4619	9.11982	121.34	352.765	38.1114	69.5466	127.271	172.916
MGAL_10NCA072990	180.037	164.917	82.561	28.0963	132.06	310.285	78.707	37.28
MGAL_10NCA072989	327.609	568.469	135.1	231.014	409.476	538.986	370.09	172.123
MGAL_10B077096	378.767	1219.78	954.455	1011.47	218.033	1501.94	1888.13	995.455
MGAL_10B067723	1115.64	392.152	649.23	3.12182	541.536	552.361	1216.61	256.994
MGAL_10B060534	1711.83	1436.37	1183.37	1923.04	1198.29	2145.25	1217.45	1524.51
MGAL_10NCA045435	455.504	128.437	75.0555	326.23	1192.09	93.6205	72.8458	266.512
MGAL_10B066086	511.581	603.428	1050.78	469.833	529.128	619.233	542.576	488.606
MGAL_10NCA045437	72.8019	136.037	101.325	324.669	36.3388	136.418	102.152	138.809
MGAL_10B093498	57.0609	79.0384	72.5536	37.4618	81.5407	155.142	41.8654	169.743
MGAL_10B008725	68.8667	106.398	110.081	37.4618	129.401	119.032	154.902	98.3557
MGAL_10NCA051088	683.748	193.036	135.1	49.9491	248.167	803.799	229.422	318.863
MGAL_10B076969	7139.5	3464.77	3264.91	3780.52	3164.13	3857.16	5234.01	5370.7
MGAL_10B073263	189.875	150.477	188.89	142.043	93.0627	267.487	334.923	32.5209
MGAL_10B026181	1852.51	1873.36	1798.83	1698.27	2051.81	2256.25	2157.74	1822.75
MGAL_10B093353	362.042	399.752	120.089	309.06	136.492	235.389	175.835	269.685
MGAL_10NCA060028	58.0448	41.0392	131.347	265.354	53.1787	177.879	175.835	125.324
MGAL_10B018221	580.448	799.504	557.912	992.738	957.216	984.352	780.371	969.28
MGAL_10B023323	60.0124	53.1989	47.5351	0	375.796	56.1723	56.937	178.468
MGAL_10NCA067338	456.488	221.156	496.617	221.649	149.787	181.891	81.2189	488.606
MGAL_10NCA067339	317.77	354.153	296.469	173.261	417.453	271.499	39.3535	197.505
MGAL_10B054334	13029.6	13802.1	8700.18	11940.9	12031.7	13280.7	12645.9	9967.24
MGAL_10B003492	210.535	170.237	260.192	165.456	319.072	141.768	145.692	180.848
MGAL_10B023671	669.974	664.227	631.717	917.814	769.318	770.363	595.326	602.826
MGAL_10B085742	2191.93	3138.74	3760.28	3365.32	2618.16	2158.62	1693.87	1520.55
MGAL_10B078615	353.188	333.633	237.676	199.796	155.991	231.376	190.906	276.824
MGAL_10B063223	4059.2	3719.37	2664.47	5563.08	3077.27	3145.65	2515.27	2880.08
MGAL_10B059603	2042.39	2489.71	3272.42	4075.53	1983.57	2701.62	2821.73	2101.16
MGAL_10B053115	12403.9	11185.5	12225.3	10998.2	11655	9067.81	10689.1	11709.1
MGAL_10B075585	1624.27	2328.59	2287.94	2230.54	2473.7	1881.77	2171.98	2215.38
MGAL_10B021319	581.431	690.826	1078.3	1362.67	687.778	591.146	663.148	763.05
MGAL_10B043315	1484.57	1574.69	2124.07	2179.03	1939.25	1471.18	1332.16	1617.32
MGAL_10B050587	26458.6	26388.2	31031.7	29279.5	29818.2	23340.9	22270.7	22686.9
MGAL_10B092256A	243.001	165.677	135.1	380.862	277.416	254.113	225.236	189.573
MGAL_10B048842	1011.36	979.62	846.876	518.221	673.597	1007.09	818.05	759.877
MGAL_10B012309	1402.91	1287.41	1878.89	855.378	713.481	1138.16	1307.04	1380.15
MGAL_10B076660	62.9638	182.396	132.598	154.53	191.443	176.541	175.835	156.259
MGAL_10B046220	326.625	276.634	307.727	552.561	210.942	456.065	723.434	342.659
MGAL_10B063171	289.24	300.954	360.266	405.836	414.794	559.048	473.916	417.219
MGAL_10B030011	215.454	155.037	180.133	440.176	193.216	128.394	257.891	406.114
MGAL_10B079502	325.641	307.034	387.787	571.292	437.838	331.684	323.201	266.512
MGAL_10NCA029006	86.5752	124.638	125.092	152.969	86.8585	109.67	115.549	95.183
MGAL_10NCA029007	1927.28	1057.14	3039.75	1777.87	1702.6	714.19	1392.44	832.851
MGAL_10NCA029008	451.569	237.875	435.322	565.049	283.62	433.329	341.622	190.366
MGAL_10B086028	18126.7	14270.2	15799.2	12669.9	13529.5	15427.3	12732.1	13603.2
MGAL_10B050312	7826.2	8128.8	6541.08	5567.76	8080.5	6529.36	7152.29	7655.88
MGAL_10B036585	246.936	229.515	170.126	318.425	72.6775	342.383	219.375	348.211
MGAL_10B093955	6414.44	3549.13	5721.73	3561.99	3042.71	4739.87	8032.3	1979.01
MGAL_10NCA034226	459.439	343.513	355.262	440.176	450.246	743.614	226.073	323.622
MGAL_10B004839	675.877	725.025	784.329	1537.49	1110.55	1017.79	762.788	786.053
MGAL_10B025405	6693.84	1247.9	6397.23	8063.65	4442.19	4373.41	2793.26	3374.24
MGAL_10B066285	92.4781	27.3595	90.0665	363.692	92.1764	8.02461	234.446	24.5889
MGAL_10NCA047821	80.6724	71.4386	81.3101	51.51	32.7935	152.468	140.668	253.028
MGAL_10B027996	224.309	188.476	180.133	201.357	60.2692	189.916	166.624	199.884
MGAL_10NCA74843	1.96762	22.7995	15.0111	24.9745	1.77262	120.369	140.668	106.288
MGAL_10B050840	210.535	148.197	66.299	43.7054	82.427	13.3744	120.572	55.5234
MGAL_10B000024	202.665	132.237	107.579	46.8272	203.852	115.019	130.62	128.497
MGAL_10B072519	121.009	94.9981	107.579	146.725	144.469	123.044	89.592	98.3557
MGAL_10NCA043457	94.4457	75.2385	95.0702	81.1672	124.084	78.9087	95.4531	114.22
MGAL_10B072266	141.669	294.874	70.0518	84.289	469.745	189.916	145.692	149.913
MGAL_10B065708	151.507	662.707	87.5647	187.309	102.812	50.8225	38.5162	185.607
MGAL_10B057895	324.657	196.836	562.916	252.867	262.348	468.102	167.462	507.643
MGAL_10B012897	1027.1	595.828	216.41	808.55	1054.71	691.454	1194	417.219
MGAL_10B025541	22581.4	20199.6	15736.6	17741.3	21804.2	21752	22232.2	18640.8
MGAL_10B038181	84.6076	284.234	162.62	140.482	155.991	398.556	259.566	239.544
MGAL_10B022933	391.556	348.833	232.672	234.136	246.395	397.218	504.06	663.108
MGAL_10B042581	84.6076	77.5184	155.115	65.5581	104.585	141.768	140.668	111.047
MGAL_10B025578	1011.36	1095.9	958.208	746.114	980.261	1150.19	1054.17	1014.49
MGAL_10B048942	389.589	264.475	108.83	446.42	303.119	280.861	261.24	329.968
MGAL_10B010639	495.84	451.431	315.233	127.994	246.395	855.959	500.71	842.369
MGAL_10B071733	1410.78	1325.41	1558.65	1300.24	1209.82	1356.16	1018.17	1280.21
MGAL_10B013405	262.677	277.394	196.395	157.652	273.87	207.302	157.414	231.612
MGAL_10B019667	735.889	798.744	622.96	337.156	260.576	663.368	1291.13	736.082
MGAL_10B028728	299.078	338.953	212.657	137.36	565.467	246.088	430.376	133.256
MGAL_10B052113	243.985	243.195	335.248	190.431	388.204	224.689	167.462	242.717
MGAL_10NCA063581	64.9314	151.997	152.613	46.8272	101.926	78.9087	110.525	77.7328
MGAL_10B074215	372.864	541.869	346.506	293.451	351.866	230.039	313.153	352.177
MGAL_10B082722	1831.85	1550.37	2219.14	2204	1455.32	2332.49	1769.23	2172.55
MGAL_10B083753	61.98	72.1986	68.8008	98.3372	132.947	89.6082	64.4727	87.2511
MGAL_10B021904	322.689	337.433	301.473	371.496	384.659	222.014	182.533	402.941
MGAL_10B002029	1009.39	840.543	475.351	421.445	623.963	34.7733	704.176	69.8009
MGAL_10B040481	39.3524	39.5192	95.0702	59.3145	160.422	144.443	39.3535	184.02
MGAL_10B036145	194.794	398.232	475.351	291.89	615.1	537.649	708.363	760.671
MGAL_10B065653	20130.7	13017	21203.2	27668.7	20078.5	16015.8	13671.6	18587.6
MGAL_10B050257	131.83	153.517	227.668	340.278	432.52	203.29	330.737	129.29
MGAL_10B084044	64.9314	93.4781	141.354	159.213	83.3133	145.78	41.0281	496.538
MGAL_10NCA007885	5.90286	24.3195	120.089	98.3372	170.172	438.679	429.539	12.6911
MGAL_10B050195	3533.84	3733.05	3876.61	2456.87	2733.38	2963.76	4253.53	2899.91
MGAL_10B031343	282.353	269.035	635.469	611.876	775.523	1842.99	586.116	990.696
MGAL_10NCA050263	135.766	69.9186	260.192	280.963	383.773	1263.88	343.296	613.137
MGAL_10B075789	816.562	476.51	1233.41	326.23	1740.72	1294.64	2631.66	1043.84
MGAL_10NCA011932	213.487	98.038	242.679	31.2182	230.441	243.413	550.949	42.8323
MGAL_10B080720	2973.07	3324.17	2695.74	4660.87	2832.65	3347.6	2624.12	2052.78
MGAL_10B059217	877.558	516.79	724.285	1002.1	545.968	656.681	323.201	567.925
MGAL_10B026787	139.701	256.875	451.584	185.748	112.562	234.051	200.954	265.719
MGAL_10B023051	5829.07	7448.61	6612.39	7008.48	6040.21	7149.93	6932.07	5917.21
MGAL_10B055409	102.316	408.872	122.591	583.78	145.355	149.793	140.668	191.952
MGAL_10NCA057999	127.895	2011.68	1338.49	629.046	678.028	623.245	503.222	1507.86
MGAL_10B092257	562.739	3989.16	3124.81	3178.01	1820.48	1346.8	1776.77	2811.07
MGAL_10B065949	434.844	551.749	362.768	700.848	344.775	484.152	390.186	414.046
MGAL_10B039825	4246.12	5085.06	7382.95	6955.41	6796.24	7963.09	4929.23	5404.81
MGAL_10B090877	1018.24	1049.54	672.997	600.95	927.082	1031.16	1153.81	1201.69
MGAL_10B081963	395.491	581.388	546.654	652.46	534.446	604.521	602.862	548.095
MGAL_10B091617	394.508	86.6383	192.642	187.309	283.62	315.635	247.843	385.491
MGAL_10NCA74520	167.248	68.3986	263.945	455.785	437.838	58.8472	224.399	90.4238
MGAL_10NCA029030	384.669	565.429	327.742	501.051	485.699	246.088	544.25	1032.74
MGAL_10B004539	6008.12	3233.74	1441.06	43.7054	1579.41	1386.92	1642.8	4186.46
MGAL_10B091802	65.9152	15.1997	211.406	181.065	46.9745	712.853	326.55	15.8638
MGAL_10B021663	423.038	411.912	595.44	494.808	233.986	581.784	812.189	306.172
MGAL_10B018710	739.825	937.821	1032.01	883.474	755.137	797.111	1150.46	719.425
MGAL_10B066068	690.634	1445.49	1218.4	2225.85	655.871	1267.89	467.218	1136.64
MGAL_10B072569	863.785	512.99	895.662	78.0454	713.481	854.621	871.638	544.129
MGAL_10B063934	1253.37	831.423	800.591	977.128	889.857	1131.47	1428.45	959.762
MGAL_10B088938	621.768	516.79	720.532	602.511	138.265	633.944	156.577	566.339
MGAL_10NCA041370	15631.7	18540.6	24460.6	12868.1	27622.8	17664.8	22938.1	14799.4
MGAL_10NCA041371	15504.8	18333.1	24336.7	12838.5	27243.4	17416.1	22635.8	14502.7
MGAL_10NCA045452	67.8828	110.198	50.037	12.4873	37.2251	60.1846	57.7743	217.334
MGAL_10B064026	220.373	277.394	132.598	37.4618	124.084	192.591	180.021	499.711
MGAL_10B092736	1713.8	2746.59	1358.5	1180.05	1263.88	2407.38	1858.82	2376.4
MGAL_10B043977	428.941	799.504	980.725	597.828	641.69	567.073	529.179	760.671
MGAL_10NCA055796	140.685	71.4386	186.388	177.944	210.056	164.505	55.2623	53.937
MGAL_10B052895	842.141	463.591	1958.95	462.029	1048.51	1211.72	812.189	928.034
MGAL_10B055752	5.90286	37.9992	65.0481	106.142	164.854	29.4236	125.596	74.56
MGAL_10B027729	2316.87	4972.58	2720.76	4464.2	1600.68	2089.07	4824.57	1913.18
MGAL_10B011465	1920.4	2084.64	3052.26	1576.52	1606	1891.13	1883.94	1638.73
MGAL_10NCA061273	41.32	135.277	93.8193	85.8499	49.6334	105.657	148.204	149.913
MGAL_10B042016	134.782	241.675	223.915	185.748	168.399	236.726	273.8	287.135
MGAL_10B012514	4475.35	4318.23	3487.58	2943.87	2722.75	4096.56	3211.08	2354.19
MGAL_10B002623	90.5105	80.5584	77.5573	159.213	81.5407	227.364	88.7547	68.2145
MGAL_10B074761	339.414	95.7581	7.50555	187.309	45.2019	137.756	524.992	169.743
MGAL_10B056012	343.349	324.514	63.7971	574.414	107.244	270.162	770.324	342.659
MGAL_10NCA068182	72.8019	784.304	40.0296	199.796	200.306	230.039	46.8893	218.921
MGAL_10NCA068183	72.8019	784.304	40.0296	199.796	200.306	230.039	46.8893	218.921
MGAL_10B079898	1469.81	790.384	1706.26	605.632	1474.82	457.403	58.6116	360.109
MGAL_10B064852	297.11	24.3195	135.1	93.6545	384.659	205.965	36.8416	160.225
MGAL_10B091604	127.895	109.438	143.856	204.479	155.991	135.081	100.477	136.429
MGAL_10B082762	262.677	208.236	362.768	221.649	166.627	326.334	269.613	120.565
MGAL_10B065657	69.8505	685.506	103.827	129.555	89.5175	61.522	128.945	400.562
MGAL_10B058009	139.701	117.038	131.347	37.4618	310.209	393.206	139.83	82.4919
MGAL_10B008598	2270.63	1842.2	3834.08	2472.48	2237.94	3463.96	4391.68	3585.23
MGAL_10B020490	899.202	297.914	565.418	1080.15	555.717	299.585	465.543	454.499
MGAL_10B006191	3984.43	4205	6562.35	2790.9	1563.45	1805.54	5467.62	4644.93
MGAL_10NCA007898	123.96	95.7581	115.085	60.8754	130.288	119.032	133.132	88.8374
MGAL_10B088538	320.722	184.676	275.203	327.791	354.525	397.218	272.125	247.476
MGAL_10B034231	755.566	760.745	671.746	696.165	642.576	944.229	585.278	683.731
MGAL_10B063698	104.284	132.237	126.343	118.629	200.306	219.339	128.945	153.879
MGAL_10B081574	194.794	344.273	240.177	435.493	109.903	234.051	319.852	237.957
MGAL_10B083799	120.025	164.917	55.0407	88.9718	55.8376	187.241	113.037	88.8374
MGAL_10B060771	3825.05	3491.37	3324.96	3936.61	3701.24	3458.61	3421.24	4189.64
MGAL_10B048686	33.4495	519.83	265.196	149.847	30.1346	10.6995	58.6116	133.256
MGAL_10B029478	289.24	430.151	637.971	421.445	452.019	227.364	504.06	1100.95
MGAL_10B000143	5875.31	4567.51	4886.11	6441.87	3128.68	6094.69	5060.69	3780.35
MGAL_10B029728	179.053	262.955	332.746	677.434	173.717	781.062	589.465	258.58
MGAL_10B028849	446.649	261.435	310.229	462.029	274.757	468.102	249.518	120.565
MGAL_10B085915	1154.01	2024.6	974.47	1095.76	2897.35	3541.53	1551.53	2113.06
MGAL_10NCA011963	342.366	935.541	295.218	408.958	1637.02	2006.15	461.357	1380.15
MGAL_10B032183	546.998	558.589	509.126	437.054	402.385	750.301	697.478	643.278
MGAL_10B052836	47056.6	69158.6	42445.1	59139.7	48916.4	51831	57495.4	56233.3
MGAL_10B070155	299.078	509.19	277.705	221.649	297.801	259.462	371.765	361.695
MGAL_10B063137	3560.41	6460.63	3109.8	3296.64	5131.74	5194.6	5588.19	5818.85
MGAL_10NCA011977	226.276	307.794	182.635	266.915	209.17	284.874	238.633	399.769
MGAL_10B072172	951.344	444.591	370.274	99.8981	219.805	1530.03	504.897	563.166
MGAL_10B066897	196.762	120.078	187.639	343.4	54.9513	42.7979	115.549	88.8374
MGAL_10B064984	236.114	167.957	142.605	193.553	327.049	201.953	75.3577	195.918
MGAL_10B076769	1651.82	2064.88	1758.8	1401.7	2097.9	2407.38	1925.81	1555.45
MGAL_10B061307	1044.81	986.46	605.447	1442.28	686.891	1039.19	769.486	46.0051
MGAL_10B046162	1915.48	1778.36	367.772	1373.6	1486.34	1616.96	3039.43	1504.68
MGAL_10B091031	1027.1	763.025	873.145	221.649	347.434	596.496	1262.66	598.066
MGAL_10B008156	1920.4	943.901	1170.87	2001.08	1636.13	901.431	1696.39	1914.76
MGAL_10B025082	3524.01	5917.24	1668.73	1567.15	335.026	3303.47	5337	2243.15
MGAL_10B037094	8458.79	6684.83	7888.33	8915.91	7689.64	6213.72	7438.65	6305.87
MGAL_10B002920	32044.6	29668.3	32375.2	68503.6	24454.2	25677.4	16088	24045.6
MGAL_10B090288	281.369	337.433	410.303	212.283	182.58	136.418	865.777	326.002
MGAL_10B077290	274.483	425.591	262.694	254.428	145.355	280.861	229.422	84.8715
MGAL_10B064986	1605.58	2154.56	1498.61	1325.21	2277.82	1677.14	2056.43	1457.89
MGAL_10B092064	133.798	244.715	57.5425	227.893	152.446	264.812	45.2146	49.1779
MGAL_10B065893	5344.05	4666.31	4413.26	7721.81	3981.31	5371.14	5316.91	3948.51
MGAL_10B022028	1428.49	744.785	1195.88	724.261	1008.62	1215.73	371.765	2674.64
MGAL_10B004966	1.96762	0	0	0	425.43	446.703	603.699	580.616
MGAL_10B007299	100.349	143.637	218.912	156.091	104.585	90.9456	140.668	245.889
MGAL_10B044994	9.83809	331.353	107.579	324.669	5.31787	13.3744	68.6593	19.0366
MGAL_10NCA036780	127.895	151.997	128.845	315.303	63.8144	137.756	211.839	12.6911
MGAL_10B000197	4698.67	3903.28	3560.13	4395.52	5422.45	4188.85	4717.39	4146.81
MGAL_10B092344	7656.99	11721.2	8336.16	10679.7	9166.23	8728.1	8604.18	9232.75
MGAL_10B001551	460.423	527.429	435.322	362.131	428.975	191.253	552.623	728.15
MGAL_10B089014	623.735	260.675	512.879	920.936	565.467	674.067	693.291	160.225
MGAL_10B045577	920.846	626.227	1636.21	1634.27	949.24	1139.49	549.274	793.191
MGAL_10B048980	208.568	220.396	753.056	312.182	333.253	524.275	97.1277	710.7
MGAL_10B019161	104.284	323.754	92.5684	393.349	326.163	66.8718	169.136	96.7694
MGAL_10B038069	4941.67	3536.21	3911.64	6930.43	3672.88	3442.56	2439.92	1795.79
MGAL_10B076535	2687.77	2880.34	1738.78	5360.16	3403.44	5443.36	2090.76	2664.33
MGAL_10B092018	531.257	629.267	332.746	796.063	689.55	855.959	712.549	790.019
MGAL_10B062992	285.305	268.275	302.724	143.604	149.787	264.812	174.997	166.57
MGAL_10B091481	2853.05	2179.64	1728.78	1579.64	2541.94	2351.21	2039.68	1740.26
MGAL_10B060527	367.945	345.793	345.255	201.357	464.427	345.058	401.071	505.263
MGAL_10B069190	547.982	405.072	589.185	465.151	497.221	488.164	458.845	380.732
MGAL_10B047482	412.216	261.435	356.513	435.493	298.687	209.977	343.296	230.026
MGAL_10NCA065611	80.6724	71.4386	100.074	190.431	56.7239	50.8225	65.31	104.701
MGAL_10NCA003076	74.7695	28.8794	122.591	31.2182	56.7239	92.283	163.275	226.853
MGAL_10NCA003077	54.1095	48.639	90.0665	49.9491	70.9049	184.566	292.221	332.347
MGAL_10NCA003079	121.992	139.077	210.155	73.3627	66.4734	222.014	141.505	84.8715
MGAL_10NCA003080	66.899	37.9992	80.0591	48.3881	32.7935	230.039	150.715	150.706
MGAL_10B027541	557.82	716.666	823.108	647.777	678.915	892.069	970.44	660.729
MGAL_10B067682	196.762	224.196	1287.2	967.763	196.761	441.354	369.253	319.656
MGAL_10NCA003083	393.524	550.989	437.823	140.482	397.068	930.855	352.507	589.341
MGAL_10B084720	5814.31	3692.01	4400.75	4898.13	3885.59	4263.74	4372.42	5513.47
MGAL_10B010029	1884	4293.15	3267.41	4969.93	1223.11	2704.29	2609.05	1726.78
MGAL_10B013300	9547.87	9069.66	11099.5	15802.6	11733	7627.39	7827.16	10500.3
MGAL_10B075964	8919.22	6829.22	5576.62	7275.39	6010.96	6708.58	4585.1	10405.9
MGAL_10B084687	1123.51	1068.54	630.466	739.87	1168.16	789.087	1213.26	620.276
MGAL_10NCA007914	27.5467	126.157	441.576	74.9236	140.037	133.744	356.693	77.7328
MGAL_10B001079	157.41	250.795	385.285	799.185	569.898	329.009	221.049	127.704
MGAL_10B011408	9034.32	8063.44	4399.5	4130.16	8714.22	4960.55	10321.5	10402.7
MGAL_10B069936	397.459	515.27	371.524	750.797	370.478	441.354	432.051	448.153
MGAL_10B083724	283.337	654.347	251.436	394.91	332.367	674.067	414.468	475.915
MGAL_10NCA007931	328.592	313.114	147.609	181.065	149.787	302.26	450.472	232.405
MGAL_10B010478	2175.2	2326.31	2356.74	1923.04	2352.27	1603.58	3478.18	1480.1
MGAL_10B087144	609.962	596.588	472.849	349.643	330.594	355.758	171.648	542.543
MGAL_10B002593	466.326	66.8787	232.672	390.227	131.174	259.462	202.629	147.534
MGAL_10B067172	175.118	244.715	100.074	124.873	166.627	93.6205	72.0085	121.358
MGAL_10B053474	1518.02	1821.68	1120.83	1318.97	1724.76	2241.54	2933.93	1837.82
MGAL_10NCA019230	481.083	295.634	96.3212	157.652	250.826	576.435	689.105	536.197
MGAL_10NCA019231	560.771	869.423	612.953	349.643	1104.34	960.279	1153.81	824.919
MGAL_10B028858	3208.2	2660.71	2390.52	2912.65	2923.94	2083.72	2945.65	3089.48
MGAL_10B086972	1613.45	2579.39	2261.67	1573.4	2157.28	1150.19	2528.67	2571.53
MGAL_10B005060	60.9962	97.2781	122.591	174.822	141.81	152.468	68.6593	95.183
MGAL_10B006959	287.272	311.594	312.731	131.116	181.694	423.967	376.789	423.564
MGAL_10B057721	4849.2	4023.36	3955.42	3006.31	3924.59	4876.29	4727.44	5707.01
MGAL_10B021332	53.1257	182.396	97.5721	343.4	35.4525	248.763	113.874	207.023
MGAL_10B032751	1166.8	1056.38	1938.93	1283.07	1102.57	1099.37	1281.08	2107.51
MGAL_10B005242	161.345	95.7581	107.579	81.1672	95.7216	286.211	50.2385	69.8009
MGAL_10B023294	129.863	288.794	40.0296	109.264	76.2228	69.5466	118.898	131.67
MGAL_10B060943	250.871	164.157	80.0591	74.9236	97.4943	24.0738	50.2385	141.188
MGAL_10B041678	2298.18	3140.26	1888.9	1326.77	3564.75	3557.58	3712.62	2319.29
MGAL_10B047373	7478.92	9612.29	6349.69	4482.93	6720.01	7347.87	6936.26	6505.76
MGAL_10B023637	115.106	174.797	167.624	113.946	72.6775	173.867	157.414	126.117
MGAL_10NCA045476	55.0933	0	60.0444	53.0709	42.543	204.628	3.34923	127.704
MGAL_10NCA045479	70.8343	113.238	172.628	46.8272	223.351	362.445	110.525	112.633
MGAL_10NCA045480	627.67	1105.78	720.532	382.422	744.502	482.814	1332.16	1188.99
MGAL_10B080518	2404.43	1929.6	2654.46	2943.87	2432.04	1481.88	1813.61	1141.4
MGAL_10B048401	364.993	493.99	212.657	349.643	297.801	369.132	336.598	325.209
MGAL_10B077121	430.909	483.35	484.108	313.743	2173.24	711.516	449.634	489.399
MGAL_10B072382	169.215	161.117	180.133	96.7763	184.353	192.591	293.058	277.617
MGAL_10B003486	96.4133	658.147	377.779	380.862	67.3597	262.137	208.49	218.921
MGAL_10B037489	548.966	703.746	768.067	1220.63	930.627	585.797	710.875	690.87
MGAL_10B079176	112.154	176.316	205.152	165.456	163.081	69.5466	66.9847	66.6281
MGAL_10NCA073342	153.474	247.755	65.0481	90.5327	219.805	50.8225	274.637	87.2511
MGAL_10B017135	910.024	906.662	1325.98	2047.91	839.337	980.34	638.029	1005.77
MGAL_10B042507	781.145	787.344	720.532	543.196	751.592	973.653	775.347	696.422
MGAL_10B070305	2471.33	1079.18	1006.99	2569.25	1060.03	1507.29	1117.81	1127.13
MGAL_10B027228	875.59	1085.26	1210.89	1139.46	905.81	452.053	694.966	342.659
MGAL_10B063532	1040.87	503.11	683.005	458.907	1012.17	615.22	527.504	336.313
MGAL_10B060697	2817.63	3850.08	3189.86	3215.47	2290.23	2838.04	2962.4	1589.56
MGAL_10NCA055877	35.4171	264.475	177.631	28.0963	157.763	76.2338	31.8177	14.2774
MGAL_10NCA055881	193.81	71.4386	48.786	101.459	70.0186	203.29	197.605	222.094
MGAL_10B080115	2298.18	1916.68	1998.98	2508.38	2435.58	2690.92	1958.46	2171.76
MGAL_10B057449	501.743	381.512	330.244	291.89	379.341	452.053	474.754	491.779
MGAL_10B020971	13247	20321.2	15092.4	14155.9	15975.8	19370.1	17819.6	14525.7
MGAL_10B034277	685.715	604.188	709.274	671.19	769.318	843.922	663.148	652.003
MGAL_10NCA015257	210.535	252.315	190.14	137.36	209.17	361.108	262.915	336.313
MGAL_10B081921	43960.5	39862.7	41956	38732.4	39332.7	42838.1	30468	32048.1
MGAL_10B071530	364.009	416.472	460.34	671.19	406.817	440.016	383.487	536.197
MGAL_10B081658	200.697	130.717	137.602	140.482	175.49	270.162	137.319	279.203
MGAL_10NCA015246	2173.23	735.665	838.119	733.627	742.729	815.836	715.899	774.948
MGAL_10B092189	72036.5	49276.7	99229.6	126117	72272.5	38881.9	55051.3	46850.6
MGAL_10B055993	5696.26	9743.01	7430.49	7726.49	5553.63	1270.56	4255.2	3686.75
MGAL_10B026050	182.005	171.757	226.417	152.969	133.833	197.94	162.438	257.787
MGAL_10B093442	627.67	430.911	1194.63	271.598	180.808	472.115	316.502	1578.45
MGAL_10B037448	5002.67	4014.24	4035.48	5500.64	6158.98	3231.24	3253.78	4249.92
MGAL_10B032338	673.909	465.111	537.897	440.176	409.476	552.361	282.173	327.588
MGAL_10B004513	595.205	1184.06	466.595	460.468	756.024	1183.63	910.991	883.615
MGAL_10B093466	1764.95	2042.84	2071.53	2389.75	2832.65	2190.72	1674.62	1113.64
MGAL_10B013886	360.074	272.075	534.145	483.881	331.481	358.433	304.78	341.072
MGAL_10B037768	186.924	22.7995	27.5203	212.283	24.8167	346.396	28.4685	23.7957
MGAL_10B001824	186.924	766.825	610.451	24.9745	292.483	132.406	78.707	90.4238
MGAL_10B002165	7872.44	4672.39	5704.21	12643.4	8508.59	4935.14	7700.72	3948.51
MGAL_10B091672	3482.69	4926.22	6370.96	4737.36	4876.49	4469.71	3705.09	4185.67
MGAL_10NCA015902	234.147	186.196	679.252	226.332	276.529	231.376	174.16	506.849
MGAL_10B046420	15541.2	15666.3	17284	15337.5	18495.5	15447.4	15717.9	8069.14
MGAL_10NCA019234	87.559	474.99	477.853	427.689	85.9722	34.7733	49.4012	37.28
MGAL_10NCA019256	220.373	120.838	298.971	109.264	182.58	135.081	307.292	224.473
MGAL_10B023171	263.661	272.835	427.816	391.788	295.142	223.352	483.964	312.517
MGAL_10B081754	151.507	253.075	317.735	483.881	83.3133	185.903	185.882	303.792
MGAL_10B089913	3906.71	3229.18	2275.43	2363.21	3805.82	4202.22	3360.96	3647.09
MGAL_10B038916	6249.16	5504.57	10755.4	4283.13	5064.38	5827.21	6294.05	2329.6
MGAL_10B072861	4645.55	4187.52	8797.75	3103.09	3777.46	4299.85	5126	1119.19
MGAL_10B070265	7425.79	5926.36	6742.48	12192.3	6693.42	5882.04	3804.73	5626.9
MGAL_10B039159	1007.42	1738.09	1551.15	805.429	1771.74	1110.07	1532.27	2097.2
MGAL_10B025197	82.64	104.878	97.5721	252.867	65.5871	40.1231	55.2623	44.4187
MGAL_10B056198	32802.2	52209.4	51828.3	62661.1	39930.1	39437	37672.2	50366.9
MGAL_10B093069	2048.29	1614.97	1688.75	1948.01	2061.56	1555.44	1758.35	1464.23
MGAL_10B087642	105.268	45.5991	212.657	112.385	136.492	213.99	212.676	421.978
MGAL_10B059003	462.39	755.425	422.812	1030.2	995.328	385.181	135.644	34.9004
MGAL_10B047839	39.3524	34.9593	42.5314	37.4618	19.4989	97.6328	219.375	33.314
MGAL_10B042331	269.564	305.514	125.092	165.456	225.123	387.856	192.581	185.607
MGAL_10B044508	790.983	778.224	525.388	474.516	863.267	965.628	894.245	583.789
MGAL_10B042013	251.855	136.797	640.473	396.471	237.531	350.408	180.021	245.889
MGAL_10B057181	645.379	814.704	250.185	387.105	558.376	690.117	768.649	712.286
MGAL_10B021370	57.0609	202.156	167.624	37.4618	492.789	93.6205	168.299	157.052
MGAL_10B004225	1875.14	1708.45	1313.47	1757.58	1891.39	1968.7	1765.05	1543.55
MGAL_10B074252	5837.93	10240.8	10462.7	13662.6	13962.1	9172.13	11220.8	5118.46
MGAL_10NCA047491	189.875	509.19	469.097	727.383	280.961	616.558	221.887	318.863
MGAL_10NCA047492	202.665	409.632	462.842	588.462	1162.84	409.255	266.264	281.583
MGAL_10B093907	1073.34	1012.3	718.03	742.992	1171.7	855.959	986.349	938.346
MGAL_10B032605	397.459	475.75	1463.58	399.592	416.566	599.171	467.218	395.009
MGAL_10B030295	186.924	78.2784	105.078	156.091	65.5871	157.817	58.6116	82.4919
MGAL_10B009662	1690.18	1253.97	1431.06	964.641	1744.26	1476.53	1708.11	1059.7
MGAL_10B075705	134.782	122.358	397.794	231.014	343.003	402.568	1161.35	135.636
MGAL_10NCA055808	64.9314	40.2792	366.521	39.0227	110.789	74.8964	222.724	196.711
MGAL_10NCA055809	1143.19	579.108	1531.13	202.918	490.13	423.967	427.027	570.305
MGAL_10NCA055810	1019.23	524.39	1294.71	936.545	335.026	1146.18	837.308	1002.59
MGAL_10B064896	7694.37	3790.04	7100.25	4443.91	5278.87	6455.8	7044.27	7627.33
MGAL_10B070624	224.309	115.518	152.613	96.7763	146.241	128.394	159.089	255.408
MGAL_10B028271	3417.75	3277.81	3282.43	2887.68	3837.73	3480.01	2004.52	2316.12
MGAL_10B088711	1957.78	1709.97	1295.96	3611.94	1652.08	3236.59	3622.2	2620.7
MGAL_10B045199	551.917	408.872	926.935	891.278	459.996	739.602	349.995	503.677
MGAL_10B030910	675.877	468.911	1154.6	782.015	537.991	897.419	411.956	631.38
MGAL_10B011683	163.312	24.3195	175.129	93.6545	116.993	189.916	160.763	99.9421
MGAL_10B074861	67.8828	113.238	76.3064	132.677	180.808	85.5959	106.338	105.494
MGAL_10B005017	9.83809	117.798	7.50555	56.1927	68.246	24.0738	57.7743	214.955
MGAL_10B087120	210.535	199.116	147.609	380.862	219.805	222.014	309.804	150.706
MGAL_10NCA073546	248.904	255.355	317.735	293.451	197.647	2.67487	202.629	230.026
MGAL_10B077300	9269.45	9673.85	10477.7	15307.8	10624.2	7139.23	6712.7	8695.76
MGAL_10B075253	129.863	77.5184	55.0407	78.0454	76.2228	213.99	147.366	166.57
MGAL_10B031995	204.632	120.078	266.447	110.824	99.2669	88.2707	40.1908	187.193
MGAL_10B073456	249.888	475.75	417.809	767.967	1146.89	302.26	365.066	1827.51
MGAL_10B074002	972.988	1718.33	1439.81	3710.28	1447.35	1825.6	1604.28	1192.96
MGAL_10NCA012038	198.73	174.797	103.827	237.258	409.476	278.187	263.752	100.735
MGAL_10NCA012039	198.73	174.797	103.827	237.258	409.476	278.187	241.145	100.735
MGAL_10B090417	127.895	133.757	87.5647	24.9745	74.4502	109.67	95.4531	123.738
MGAL_10B010238	334.495	240.155	132.598	265.354	347.434	403.905	447.123	245.889
MGAL_10B077536	991.68	1011.54	975.721	1532.81	990.896	850.609	881.686	1534.03
MGAL_10B024139	426.973	0	305.226	0	262.348	5.34974	217.7	483.847
MGAL_10B010679	1682.31	1538.21	980.725	1123.85	1548.39	1321.39	2275.8	2041.67
MGAL_10B086932	788.031	767.585	768.067	2057.28	1031.67	500.201	595.326	613.93
MGAL_10B041513	523.387	501.59	449.082	574.414	413.021	247.426	467.218	339.486
MGAL_10B071690	0	1.51997	72.5536	40.5836	0	288.886	153.227	152.293
MGAL_10B068155	5893.02	6605.79	4891.11	5188.46	5252.28	5109	3823.15	4397.45
MGAL_10B059879	625.703	525.909	720.532	950.593	851.745	769.025	635.517	802.71
MGAL_10B007746	1604.59	1337.57	1857.62	1623.34	1280.72	1879.1	1298.66	2675.43
MGAL_10B067383	9816.45	6278.99	6931.37	10721.9	6437.28	5312.29	4712.37	7122.86
MGAL_10NCA021483	145.604	231.035	0	206.04	54.9513	203.29	213.514	476.708
MGAL_10B006453	697.521	850.423	225.166	262.233	234.873	1091.35	917.69	801.123
MGAL_10B059374	9185.83	7429.61	15442.7	12409.2	10903.4	15145.1	10998.9	9074.9
MGAL_10NCA030506	120.025	1.51997	250.185	171.7	335.026	279.524	391.86	382.318
MGAL_10B070269	1709.86	462.071	1676.24	1117.61	2267.18	2328.47	3128.18	2294.7
MGAL_10B034393	6667.28	5839.72	5825.55	5681.71	6091.62	7466.9	6738.66	4100.01
MGAL_10B078177	3369.55	3144.82	2096.55	2188.39	2349.61	2998.53	2171.98	2669.09
MGAL_10B002751	74.7695	93.4781	122.591	123.312	143.582	211.315	180.859	194.332
MGAL_10NCA041786	1.96762	52.439	2.50185	1.56091	80.6544	173.867	241.982	0
MGAL_10NCA041788	0	123.118	0	63.9972	196.761	159.155	466.381	0
MGAL_10B043201	519.451	661.947	730.54	526.026	418.339	500.201	497.361	860.613
MGAL_10B079325	1920.4	1922	1431.06	1350.19	984.692	2254.92	1809.42	1758.51
MGAL_10NCA029073	2363.11	2304.27	1868.88	1353.31	1379.1	2515.72	2697.81	3048.23
MGAL_10B040041	686.699	696.146	615.455	1105.12	948.353	1614.28	706.688	507.643
MGAL_10B046017	4771.48	5698.37	2479.33	2893.92	4640.73	4627.53	6276.46	3961.2
MGAL_10B048303	2095.51	1585.33	1733.78	1929.28	1891.39	1855.02	2145.18	1445.99
MGAL_10B020560	131.83	133.757	152.613	124.873	85.0859	230.039	126.434	177.675
MGAL_10B092320B	1082.19	1167.34	1569.91	533.831	1573.2	961.616	1924.97	1588.76
MGAL_10B092320A	575.529	281.194	203.901	1087.95	186.125	532.299	115.549	102.322
MGAL_10B028037	1892.85	1095.9	1325.98	1670.17	1313.51	1203.69	1435.15	953.416
MGAL_10B038308	862.801	840.543	939.444	387.105	733.866	866.658	796.28	669.454
MGAL_10NCA038923	1011.36	1474.37	674.248	661.825	697.527	338.371	813.026	462.431
MGAL_10NCA038924	227.26	271.315	92.5684	191.992	132.06	141.768	216.026	101.529
MGAL_10NCA038922	155.442	165.677	36.2768	121.751	155.105	117.694	114.711	69.0077
MGAL_10B013463	3232.8	3247.42	3658.95	5207.19	3318.35	3346.26	3463.11	2596.91
MGAL_10B043283	1034.97	30.3994	45.0333	3187.37	1347.19	2573.23	1634.43	1283.38
MGAL_10B047282	602.091	288.034	422.812	359.009	232.214	612.545	524.155	531.438
MGAL_10B025174	1666.57	5553.21	4577.13	2155.61	4639.84	1596.9	1116.13	947.071
MGAL_10B094137	155.442	247.755	20.0148	271.598	88.6312	82.921	170.811	120.565
MGAL_10B079637	1194.34	951.501	665.492	727.383	709.049	762.338	1334.67	842.369
MGAL_10B085205	551.917	271.315	422.812	911.57	514.061	454.728	382.65	716.252
MGAL_10B051981	285.305	121.598	142.605	184.187	74.4502	129.731	117.223	88.8374
MGAL_10B004701	1617.38	954.541	943.197	1247.17	1728.31	1286.61	739.343	2251.08
MGAL_10B021294	4229.4	3559.77	2694.49	2943.87	3157.93	3542.87	3515.02	2905.46
MGAL_10B007533	1391.11	433.191	781.828	955.276	483.926	925.505	657.287	705.94
MGAL_10B075523	109.203	107.918	180.133	148.286	81.5407	153.805	234.446	133.256
MGAL_10NCA051130	232.179	132.237	83.8119	156.091	88.6312	183.229	142.342	164.191
MGAL_10NCA051136	1305.52	1310.21	1627.45	2313.27	2876.97	1798.85	3007.61	2322.46
MGAL_10B083735	691.618	354.153	647.979	810.111	583.193	414.605	329.899	209.403
MGAL_10B031509	28947.6	25547.6	30905.3	29079.7	29230.6	20818.5	20986.3	20040.8
MGAL_10B049419	3063.58	2907.7	3112.3	3103.09	3632.1	2846.06	3000.91	2127.34
MGAL_10B073380	1349.79	1640.81	1531.13	1923.04	1442.92	3130.94	2010.38	1519.75
MGAL_10B069764	8094.78	7941.84	13502.5	9203.11	8061.89	10822.5	8383.13	8287.26
MGAL_10B085818	297.11	797.984	275.203	568.171	149.787	318.31	331.574	487.02
MGAL_10B027590	159.377	332.873	301.473	421.445	173.717	160.492	339.947	164.984
MGAL_10NCA073068	344.333	0	200.148	24.9745	81.5407	184.566	58.6116	82.4919
MGAL_10B094000	444.682	109.438	230.17	299.694	304.891	521.6	360.043	637.726
MGAL_10B072851	381.718	41.0392	510.377	1370.48	1272.74	1481.88	349.995	1795.79
MGAL_10B035561	301.046	256.875	255.189	284.085	209.17	224.689	185.045	345.831
MGAL_10B055852	120.025	228.755	80.0591	202.918	260.576	133.744	269.613	131.67
MGAL_10B094290	293.175	372.393	262.694	468.272	343.889	109.67	79.5443	526.679
MGAL_10B030532	1497.36	977.34	1270.94	1183.17	1125.62	1008.43	1372.35	969.28
MGAL_10NCA000390	207.584	161.117	180.133	159.213	171.944	98.9702	252.867	1.58638
MGAL_10B047991	94.4457	376.952	83.8119	84.289	374.91	131.069	411.118	59.4894
MGAL_10B065186	21.6438	369.353	35.0259	45.2663	182.58	92.283	187.557	5.55234
MGAL_10B059507	682.764	548.709	108.83	571.292	678.028	222.014	789.582	125.324
MGAL_10B088443	43.2876	64.5987	57.5425	43.7054	122.311	76.2338	100.477	84.8715
MGAL_10B094453	710.31	916.542	375.277	664.947	737.411	187.241	726.784	855.06
MGAL_10NCA000405	577.496	797.984	310.229	588.462	574.33	117.694	557.647	658.349
MGAL_10B062101	160.361	132.997	177.631	199.796	155.991	184.566	190.906	314.104
MGAL_10B058187	230.211	255.355	82.561	90.5327	324.39	382.506	267.939	144.361
MGAL_10B019745	2394.59	1643.09	2917.16	2637.93	1630.81	1535.38	1406.68	1359.53
MGAL_10B048282	308.916	412.672	250.185	218.527	354.525	518.925	281.336	314.104
MGAL_10B004106	1975.49	1927.32	2104.05	1077.03	2184.76	2834.03	1900.69	2551.7
MGAL_10B021524	3587.95	2423.59	4519.59	2650.42	3312.15	3544.2	2928.9	3283.81
MGAL_10B080568	234.147	191.516	245.181	426.128	171.944	350.408	488.151	230.026
MGAL_10B000911	2767.46	2559.63	4288.17	2970.41	4471.44	3002.54	4224.22	2243.15
MGAL_10B022031	5883.18	6479.63	5709.22	6958.53	8017.57	5421.96	6850.86	5009.8
MGAL_10NCA005972	196.762	120.838	140.104	237.258	162.195	226.027	213.514	182.434
MGAL_10B055970	274.483	82.8383	42.5314	98.3372	85.0859	490.839	410.281	99.9421
MGAL_10B042555	183.972	126.917	111.332	107.703	112.562	106.995	361.717	91.217
MGAL_10B036573	55.0933	1083.74	617.957	799.185	593.829	690.117	617.096	1047.81
MGAL_10NCA005983	169.215	148.957	157.616	241.941	263.235	232.714	226.073	161.811
MGAL_10NCA005987	330.56	592.028	222.665	190.431	543.309	251.438	388.511	474.329
MGAL_10B078545	672.926	781.264	347.757	318.425	683.346	605.858	553.461	479.088
MGAL_10B092138	173.15	168.717	225.166	305.938	173.717	131.069	167.462	191.952
MGAL_10B016340	889.364	693.106	910.673	849.134	593.829	690.117	1023.19	1713.29
MGAL_10B033954	192.827	161.877	152.613	177.944	226.896	200.615	155.739	255.408
MGAL_10B092166	7226.08	7998.84	7528.06	11920.7	8604.31	5791.09	6864.25	5622.93
MGAL_10B061551	218.406	468.151	482.857	176.383	147.128	0	180.859	534.611
MGAL_10B018883	13.7733	28.8794	45.0333	107.703	85.0859	77.5712	140.668	76.1464
MGAL_10B022218	2257.84	864.863	1462.33	1768.51	2664.25	2105.12	2210.49	1298.45
MGAL_10B015734	245.952	8.35983	298.971	151.408	420.112	258.125	571.044	47.5915
MGAL_10B082109	1546.55	1583.81	1428.56	824.159	1034.33	1392.27	1003.1	811.435
MGAL_10B060071	92.4781	79.7984	140.104	376.179	100.153	94.9579	97.9651	76.9396
MGAL_10B029378	16080.4	6338.27	9299.37	25018.2	8360.58	8746.83	8493.65	9055.07
MGAL_10NCA014348	1057.6	27.3595	67.5499	504.173	33.6798	26.7487	289.709	328.381
MGAL_10B003457	51.1581	393.672	141.354	262.233	173.717	248.763	458.845	283.169
MGAL_10B068995	3832.92	1640.05	4305.68	3399.66	4291.52	3728.77	4600.17	2412.89
MGAL_10B076097	94.4457	50.159	105.078	140.482	74.4502	240.738	44.3773	152.293
MGAL_10B037469	4447.8	5349.53	3540.12	1442.28	4731.13	2209.44	3158.33	8071.52
MGAL_10B061777	9228.13	10062.2	12626.8	10846.7	10213.9	8754.85	8198.92	8301.54
MGAL_10B057977	626.687	610.268	387.787	416.762	265.007	580.447	493.175	581.409
MGAL_10B092267	442.714	930.221	280.207	312.182	380.228	599.171	502.385	625.035
MGAL_10B088051	3716.83	1016.1	3456.3	3693.11	2557.9	2612.01	3767.89	3961.2
MGAL_10B011671	314.819	258.395	182.635	312.182	175.49	335.696	200.117	387.077
MGAL_10B025772	3638.13	3598.53	3137.32	3636.92	2447.99	4148.72	3523.39	4702.04
MGAL_10B018349	17564.9	13412.2	20240	27618.7	8434.14	18795	12853.5	18090.3
MGAL_10NCA057790	2298.18	1603.57	1861.38	1690.46	419.225	2141.23	2530.35	1757.71
MGAL_10B047866	2044.36	1469.81	943.197	4436.1	665.62	1235.79	1828.68	1008.94
MGAL_10B086655	198.73	98.038	85.0628	42.1445	88.6312	98.9702	177.509	203.85
MGAL_10B060659	4137.9	4846.42	3338.72	4966.81	5187.58	4873.61	6546.08	4169.81
MGAL_10NCA027871	15.741	72.9585	17.5129	21.8527	14.181	34.7733	289.709	186.4
MGAL_10B008961	800.821	500.07	1107.07	905.327	591.17	759.663	419.491	674.213
MGAL_10B083903	1191.39	603.428	1546.14	1343.94	1207.16	909.456	455.496	860.613
MGAL_10B063747	960.198	164.157	540.399	284.085	879.221	1139.49	303.106	163.397
MGAL_10B000409	850.011	398.232	590.436	346.522	432.52	460.078	265.427	577.443
MGAL_10B047506	417.135	269.795	142.605	326.23	148.014	267.487	149.878	762.257
MGAL_10NCA033174	245.952	103.358	122.591	173.261	71.7912	100.308	294.732	360.109
MGAL_10B004160	346.301	452.951	135.1	346.522	395.295	418.617	716.736	393.423
MGAL_10B058535	157.41	164.157	80.0591	206.04	167.513	176.541	325.713	196.711
MGAL_10B016386	1166.8	1168.86	1423.55	1092.64	1007.74	861.308	1271.03	718.631
MGAL_10NCA047809	344.333	316.914	100.074	45.2663	127.629	147.118	693.291	49.1779
MGAL_10B076111	279.402	373.913	60.0444	81.1672	223.351	411.93	318.177	271.271
MGAL_10B020344	400.41	349.593	302.724	346.522	356.297	561.723	438.749	325.209
MGAL_10B079930	43.2876	75.2385	258.941	87.4108	4.43156	0	0	19.0366
MGAL_10B084391	240.049	249.275	222.665	162.334	476.836	29.4236	288.034	115.806
MGAL_10B050793	53.1257	69.9186	80.0591	96.7763	105.471	98.9702	259.566	99.1489
MGAL_10B025200	4114.29	4425.39	2752.03	2317.95	2775.04	4660.96	4127.09	3737.52
MGAL_10B006584	35175.1	43794.9	35368.6	30041.2	40325.4	44328	35888.7	33561.5
MGAL_10B072605	1408.82	1769.24	848.127	1370.48	921.764	1693.19	1416.73	1353.18
MGAL_10B048229	604.059	279.674	327.742	483.881	310.209	280.861	663.148	155.466
MGAL_10NCA046642	249.888	48.639	255.189	46.8272	237.531	169.854	265.427	30.1413
MGAL_10B066511	338.43	123.118	215.159	174.822	380.228	319.647	195.93	274.444
MGAL_10B069471	149.539	354.153	232.672	206.04	138.265	136.418	376.789	418.012
MGAL_10NCA055269	764.42	834.463	930.688	385.544	714.367	456.065	613.747	941.518
MGAL_10B065286	5526.06	4688.35	5225.11	9117.26	4671.75	2993.18	3295.65	4274.51
MGAL_10B019021	1078.26	1281.33	2055.27	1713.88	1155.75	1762.74	1326.3	1821.17
MGAL_10NCA055270	143.636	107.918	35.0259	221.649	150.673	147.118	202.629	128.497
MGAL_10B082502	174.134	445.351	100.074	143.604	98.3806	56.1723	218.537	299.033
MGAL_10B024611	135.766	177.836	205.152	121.751	300.46	205.965	204.303	315.69
MGAL_10B018190	371.88	360.993	183.886	287.207	336.798	320.984	405.257	369.627
MGAL_10B041451	2178.15	1431.81	2221.64	2144.69	1816.94	969.641	1866.36	1437.26
MGAL_10B011065	460.423	652.067	627.964	633.729	701.072	407.918	929.412	463.224
MGAL_10B045685	5898.92	5016.66	4115.54	10142.8	3412.3	3274.04	3453.06	3988.17
MGAL_10B074276	729.987	883.102	853.13	496.369	762.228	909.456	336.598	594.894
MGAL_10B066155	207.584	53.1989	62.5462	143.604	53.1787	10.6995	41.8654	38.0732
MGAL_10B047688	57.0609	255.355	102.576	124.873	93.949	165.842	133.969	149.12
MGAL_10B040409	354.171	550.229	500.37	661.825	817.179	267.487	571.044	363.282
MGAL_10B038660	11.8057	57.7588	47.5351	121.751	46.0882	205.965	167.462	136.429
MGAL_10B026150	18219.2	17453.8	20084.8	24448.5	17306.1	12739.1	14351.5	16681.6
MGAL_10NCA007955	5064.65	3419.17	4742.25	4991.78	4911.94	3859.84	4661.29	5312.8
MGAL_10B078448	4205.79	2881.1	4958.66	7214.52	3540.81	4532.57	4884.86	2508.86
MGAL_10NCA007961	3.93524	323.754	0	0	780.84	0	562.671	828.885
MGAL_10NCA007962	1.96762	359.473	0	0	1156.64	0	578.58	1182.65
MGAL_10B073191	586.35	834.463	763.064	221.649	283.62	577.772	734.319	407.7
MGAL_10B077061	198.73	98.038	205.152	162.334	281.847	144.443	88.7547	101.529
MGAL_10B044141	190.859	189.996	102.576	59.3145	152.446	131.069	221.049	253.821
MGAL_10B079912	952.328	1188.62	1160.86	977.128	1189.43	3044	1379.88	985.937
MGAL_10B073851	706.375	600.388	718.03	649.338	592.056	1031.16	701.664	518.747
MGAL_10B091853	3810.29	4863.9	4480.81	2834.61	5680.37	3409.12	3719.32	3250.5
MGAL_10NCA012048	32.4657	266.755	135.1	193.553	11.5221	76.2338	71.1712	161.018
MGAL_10B016915	1853.5	2400.79	2772.05	1837.19	1862.14	1579.51	1445.19	2446.2
MGAL_10B042059	796.886	288.034	275.203	597.828	701.959	589.809	812.189	374.386
MGAL_10NCA012051	161.345	9.8798	42.5314	78.0454	161.309	93.6205	240.307	65.0417
MGAL_10B019542	25935.2	21044.7	35451.2	38502.9	25302.4	20714.2	26541	24979.2
MGAL_10B048818	1783.65	1276.77	1876.39	1342.38	718.799	1009.76	1392.44	1186.61
MGAL_10B044635	8204.97	7332.33	8475.01	4403.32	6578.2	8617.1	6119.05	6033.81
MGAL_10B019654	2415.25	2845.38	4364.47	3989.68	1629.04	2011.5	1929.16	1959.18
MGAL_10B048763	2307.03	1324.65	1692.5	1236.24	1432.28	1274.58	1313.74	605.205
MGAL_10B045804	634.557	1436.37	1212.15	1181.61	1139.8	597.834	1026.54	634.553
MGAL_10B059019	448.617	1390.01	1165.86	864.743	945.694	381.169	735.157	256.994
MGAL_10B027991	1875.14	1591.41	1843.86	2753.44	1568.77	1706.57	1766.72	2447.79
MGAL_10B086927	1464.89	850.423	2511.86	2285.17	1615.75	2159.96	984.674	1278.62
MGAL_10B083586	1677.4	2104.4	1614.94	1130.1	1175.25	1959.34	1946.74	2439.86
MGAL_10B037350	1379.3	1886.28	888.156	917.814	1656.52	1346.8	1371.51	1461.85
MGAL_10B090768	1202.22	866.383	1073.29	1002.1	840.223	636.619	818.887	636.14
MGAL_10NCA029077	635.541	270.555	322.738	315.303	311.095	444.029	745.204	359.316
MGAL_10B025089	2550.03	2729.87	1868.88	2347.61	2973.58	2492.98	3364.3	2435.89
MGAL_10B018691	2.95143	300.194	100.074	265.354	164.854	227.364	97.1277	199.091
MGAL_10B004097	1641.98	992.54	923.182	633.729	1391.51	1841.65	1806.91	1391.26
MGAL_10B070597	3361.68	2547.47	2294.19	2336.68	2728.95	4207.57	3579.49	3127.55
MGAL_10B019678	9064.82	5368.53	5326.44	4532.88	5442.84	8099.51	7409.34	5482.54
MGAL_10B003529	1233.7	1661.33	360.266	271.598	1384.42	1350.81	1039.1	1065.26
MGAL_10B013050	4659.32	2424.35	3009.72	1994.84	2036.74	4512.51	4489.65	4339.55
MGAL_10B005036	4463.54	2878.82	3612.67	3902.27	4332.29	2982.48	4757.59	3453.56
MGAL_10B041085	1201.23	1202.3	2154.09	1073.9	670.052	1184.97	1371.51	1323.04
MGAL_10B068326	304.981	258.395	405.299	349.643	333.253	222.014	254.542	374.386
MGAL_10B061770	1412.75	651.307	1486.1	1348.62	1921.52	2119.83	1423.42	944.691
MGAL_10B091077	311.868	157.317	332.746	243.502	299.573	351.745	385.162	248.269
MGAL_10B076134	655.217	801.024	535.396	544.757	576.103	351.745	719.248	494.951
MGAL_10B071204	935.603	390.632	405.299	471.394	545.082	658.018	582.766	1054.94
MGAL_10B091153	1448.17	2109.72	3717.75	3073.43	2049.15	1794.84	1477.01	1537.21
MGAL_10B054173	2251.94	5198.3	1916.42	4136.41	2350.5	4705.1	3041.94	1855.27
MGAL_10B075190	2074.85	1574.69	1661.23	1027.08	703.731	2040.93	987.186	1779.13
MGAL_10B063021	472.229	620.148	155.115	246.623	129.401	149.793	1019.84	92.0102
MGAL_10B006595	446.649	631.547	495.366	694.604	1052.94	861.308	1054.17	1284.97
MGAL_10NCA045497	208.568	41.0392	247.683	93.6545	54.065	26.7487	205.978	46.0051
MGAL_10B019127	649.314	342.753	711.776	515.1	550.399	573.76	368.416	1189.79
MGAL_10B066173	3400.05	3853.12	5856.83	5850.28	4825.08	4656.95	4356.51	3750.21
MGAL_10B080318	93.4619	139.077	146.358	65.5581	79.768	13.3744	161.6	220.507
MGAL_10B005173	536.176	800.264	605.447	549.44	517.606	335.696	722.597	425.151
MGAL_10NCA052835	171.183	320.714	112.583	43.7054	5.31787	36.1108	333.249	23.7957
MGAL_10B002257	1831.85	1492.61	245.181	134.238	1829.35	1725.29	425.353	164.984
MGAL_10B006433	60.9962	41.0392	75.0555	37.4618	147.128	227.364	10.0477	37.28
MGAL_10B027474	340.398	1022.94	657.986	558.805	974.943	1286.61	766.974	947.071
MGAL_10B055288	292.191	563.149	2.50185	379.301	0	0	0	0
MGAL_10B062376	721.132	711.346	190.14	654.02	254.371	112.345	307.292	192.746
MGAL_10B021571	178.07	552.509	172.628	76.4845	548.627	131.069	527.504	353.763
MGAL_10B050303	2508.71	5322.93	1911.41	3050.01	4436.88	100.308	3736.07	2717.47
MGAL_10B043814	47.2229	98.798	137.602	159.213	63.8144	101.645	82.0562	111.047
MGAL_10NCA003175	37.3848	47.1191	15.0111	24.9745	42.543	133.744	189.232	76.1464
MGAL_10B077803	1515.07	1080.7	709.274	1008.35	920.878	707.503	797.117	774.155
MGAL_10B094457	602.091	602.668	681.754	580.658	487.471	500.201	838.145	466.397
MGAL_10B033430	1077.27	1048.78	780.577	696.165	1068.89	1392.27	799.629	1212
MGAL_10NCA024519	85.5914	158.837	156.366	67.119	74.4502	38.7856	135.644	169.743
MGAL_10NCA024518	124.944	166.437	56.2916	53.0709	60.2692	140.431	149.878	157.052
MGAL_10B074580	3929.33	3734.57	3496.33	2950.12	4018.54	4071.15	3981.4	3556.67
MGAL_10B092218A	1511.13	1364.17	1253.43	1308.04	1370.24	1266.55	1369	1182.65
MGAL_10B092218B	486.986	383.032	554.159	490.125	466.2	494.851	468.055	867.751
MGAL_10B081786	5591.97	4166.24	4313.19	8403.93	5087.43	4416.21	5086.65	4180.12
MGAL_10B009849	1493.42	2413.71	1983.97	3768.03	4010.56	1179.62	3551.02	1621.28
MGAL_10B079968	247.92	633.827	222.665	471.394	106.357	203.29	173.323	152.293
MGAL_10B022017	325.641	19.7596	27.5203	121.751	393.522	20.0615	283.847	477.501
MGAL_10NCA012068	729.003	76.7585	113.834	298.133	1325.92	180.554	784.558	779.707
MGAL_10NCA012070	151.507	109.438	36.2768	6.24363	258.803	94.9579	236.958	588.548
MGAL_10NCA012071	266.612	139.077	78.8082	107.703	426.316	205.965	529.179	287.929
MGAL_10NCA012072	132.814	54.7189	27.5203	37.4618	241.963	81.5836	217.7	111.84
MGAL_10NCA012073	179.053	202.156	50.037	53.0709	178.149	156.48	147.366	168.95
MGAL_10B039477	103.3	142.877	45.0333	49.9491	171.944	133.744	211.002	91.217
MGAL_10B023006	224.309	231.795	51.2879	185.748	137.378	238.063	241.145	157.845
MGAL_10B069923	0.983809	27.3595	102.576	925.618	304.005	390.531	472.242	7.93191
MGAL_10B070990	96.4133	150.477	382.783	330.913	274.757	93.6205	102.989	496.538
MGAL_10B026607	274.483	52.439	61.2953	235.697	311.095	32.0984	26.7939	363.282
MGAL_10B062017	214.47	132.997	52.5388	57.7536	101.04	131.069	190.906	253.821
MGAL_10B093224	159.377	85.1183	120.089	131.116	168.399	160.492	239.47	149.913
MGAL_10B089695	558.804	226.475	305.226	215.405	145.355	222.014	192.581	187.193
MGAL_10B044997	474.196	991.02	467.846	646.216	451.133	855.959	705.851	879.649
MGAL_10B033937	362.042	487.15	566.669	3.12182	405.044	0	41.0281	42.8323
MGAL_10NCA026133	13.7733	89.6782	22.5166	140.482	76.2228	66.8718	154.065	160.225
MGAL_10B071178	220.373	127.677	72.5536	109.264	30.1346	82.921	75.3577	107.874
MGAL_10B069027	981.842	404.312	1030.76	1117.61	1866.57	1655.74	1058.36	337.9
MGAL_10B081893	3565.33	2961.66	3161.09	5845.6	2610.19	3386.39	1841.24	2979.23
MGAL_10B089850	1917.44	1624.09	3992.95	5338.31	2793.65	1899.16	1195.68	3087.1
MGAL_10B087228	149.539	130.717	163.871	227.893	179.921	307.61	195.93	164.984
MGAL_10B082137	1215	2023.84	1612.44	590.023	2306.18	1967.37	1260.15	1782.3
MGAL_10NCA039204	404.346	1010.78	731.791	334.034	832.247	691.454	539.226	666.281
MGAL_10NCA039207	532.241	186.956	430.318	146.725	207.397	250.1	462.194	168.157
MGAL_10B007311	3971.64	4018.8	3364.99	4673.36	4424.47	2539.79	3419.57	4240.4
MGAL_10B026001	202.665	402.792	392.79	577.536	86.8585	302.26	272.962	268.099
MGAL_10B013969	34559.3	33354.2	34769.4	72499.5	46591.6	31440.4	24909.9	26634.6
MGAL_10B081996	250.871	83.5983	105.078	112.385	46.0882	502.876	205.978	176.089
MGAL_10B020091	204.632	531.989	97.5721	259.111	264.121	433.329	422.003	415.632
MGAL_10NCA047514	97.3971	119.318	27.5203	23.4136	153.332	260.8	51.9131	57.903
MGAL_10B076845	2642.51	1559.49	1182.12	1951.14	2823.79	2995.85	1632.75	1148.54
MGAL_10B000352	188.891	75.9985	122.591	115.507	168.399	251.438	68.6593	85.6647
MGAL_10B050885	25111.7	12100.5	13596.3	36433.2	8107.98	22198.8	8926.54	20465.9
MGAL_10B060274	9325.53	4189.04	4874.85	11697.4	2912.42	7706.3	2969.93	6876.18
MGAL_10B073533	1119.58	674.866	795.588	1749.78	525.583	1322.72	447.123	1196.13
MGAL_10B002866	2117.16	2799.78	2449.31	1982.35	2692.61	1532.7	3032.73	2616.74
MGAL_10B079302	2268.66	2830.18	1551.15	1951.14	2651.84	2380.63	1279.41	2227.28
MGAL_10B040593	76.7371	115.518	67.5499	96.7763	109.903	109.67	90.4293	112.633
MGAL_10B024235	220.373	168.717	330.244	861.621	140.037	189.916	224.399	193.539
MGAL_10B008269	11.8057	348.073	280.207	218.527	113.448	117.694	48.5639	38.0732
MGAL_10B001090	2127	2401.55	2044.01	1258.09	2162.6	2428.78	2048.06	1276.25
MGAL_10B082139	100.349	162.637	105.078	87.4108	42.543	155.142	167.462	8.72511
MGAL_10B068815	25.579	4614.63	3777.79	9.36545	0	2115.82	7654.67	4809.91
MGAL_10B016244	1119.58	951.501	2227.9	1667.05	843.769	1251.84	1266.85	853.474
MGAL_10B060766	462.39	383.032	567.92	677.434	632.826	502.876	510.758	309.345
MGAL_10B057063	51.1581	48.639	117.587	46.8272	49.6334	326.334	107.175	93.5966
MGAL_10B048161	1306.5	996.34	1083.3	1653	1035.21	1464.49	1502.13	1388.88
MGAL_10B083447	1021.19	739.465	1124.58	1130.1	921.764	754.313	1436.82	1019.25
MGAL_10B008472	3152.13	3007.26	3407.52	3001.63	2623.48	2238.87	2169.47	1863.21
MGAL_10B049849	2562.82	2408.39	2294.19	1649.88	2480.79	1944.63	2574.72	2461.27
MGAL_10B002232	641.444	746.305	801.842	608.754	632.826	518.925	1266.01	1064.46
MGAL_10B072131	54073.1	48762.1	47316.2	63833.3	53848.7	36744.7	41567.3	38203.3
MGAL_10B029402	4912.16	1093.62	2104.05	4523.51	3904.2	874.683	3165.86	1161.23
MGAL_10NCA015619	146.588	123.878	127.594	93.6545	116.993	223.352	160.763	153.879
MGAL_10B092219	1435.38	1624.85	1748.79	1190.97	1220.45	1725.29	1446.87	1522.13
MGAL_10B051733	3905.72	4506.71	2752.03	2962.6	2563.21	3562.93	3059.52	2925.29
MGAL_10B088531	562.739	554.789	665.492	602.511	404.158	823.86	696.64	585.375
MGAL_10NCA012088	703.424	750.105	599.193	426.128	888.084	775.712	821.399	922.482
MGAL_10B012386	672.926	632.307	595.44	533.831	514.947	696.804	714.224	828.885
MGAL_10B094205	74.7695	116.278	80.0591	28.0963	91.2901	90.9456	97.1277	183.227
MGAL_10B023789	179.053	214.316	256.439	224.771	304.891	179.216	238.633	259.374
MGAL_10B028554	1166.8	1354.29	1230.91	1308.04	1223.11	1594.22	1557.39	1587.97
MGAL_10B070705	5835.96	4699.75	7175.3	3755.54	4371.29	3683.3	3814.78	4963.79
MGAL_10B066526	1139.25	1836.88	959.459	816.355	1215.13	1480.54	1533.95	1553.07
MGAL_10B003005	8088.88	8802.14	6004.44	5366.4	7732.18	8153.01	9076.42	7994.58
MGAL_10B044489	4228.41	5371.57	6492.3	6149.98	3382.16	3274.04	2902.11	3662.96
MGAL_10B092297A	60.9962	233.315	127.594	23.4136	157.763	306.273	30.1431	297.447
MGAL_10B092297B	97.3971	209.756	207.653	56.1927	236.645	204.628	34.3296	314.104
MGAL_10B058488	229.228	280.434	330.244	374.618	240.19	157.817	149.878	221.3
MGAL_10B034242	255.79	278.914	385.285	614.998	372.251	320.984	223.561	375.18
MGAL_10B036253	2652.35	2936.58	3022.23	2859.58	2972.69	2073.02	3585.35	3542.39
MGAL_10B013440	834.27	313.114	335.248	315.303	366.047	676.742	611.235	587.755
MGAL_10B031097	19568	23602.1	18140.9	16433.2	15871.2	20850.6	19202	21053.7
MGAL_10B045495	7456.29	11947.7	10003.6	8010.58	9660.8	9418.22	9022.83	12427.7
MGAL_10NCA031743	441.73	851.183	1223.4	243.502	501.652	857.296	388.511	1062.08
MGAL_10NCA031744	62.9638	153.517	267.698	28.0963	87.7448	192.591	89.592	273.651
MGAL_10NCA031745	143.636	226.475	235.174	109.264	173.717	316.972	200.117	280.79
MGAL_10B016533	195.778	202.916	57.5425	129.555	118.766	61.522	82.0562	138.015
MGAL_10B033068	364.009	124.638	56.2916	123.312	126.743	13.3744	251.192	252.235
MGAL_10NCA034332	33.4495	71.4386	127.594	49.9491	97.4943	82.921	165.787	169.743
MGAL_10NCA034333	33.4495	71.4386	127.594	49.9491	97.4943	82.921	165.787	169.743
MGAL_10B046057	11100.3	14708.7	10687.9	10008.5	15890.7	11951.3	12392.2	9569.86
MGAL_10B028413	534.209	490.95	527.89	967.763	595.601	542.999	590.302	463.224
MGAL_10B074453	182.005	98.798	95.0702	46.8272	129.401	28.0861	55.2623	177.675
MGAL_10B056226	22240	24964.7	17985.8	16227.2	18158.8	20304.9	21947.5	20293.8
MGAL_10NCA039209	424.022	636.867	305.226	583.78	928.855	956.266	1316.25	334.727
MGAL_10NCA039210	4183.16	3372.81	2755.79	2603.59	4739.11	2958.41	4141.33	2528.69
MGAL_10B092358B	623.735	692.346	509.126	482.321	498.107	763.676	550.111	488.606
MGAL_10B092358A	1408.82	1162.78	1713.77	1198.78	1998.63	1575.5	1358.11	1038.29
MGAL_10B057360	728.019	395.952	167.624	109.264	165.74	576.435	388.511	383.905
MGAL_10B054420	82.64	109.438	80.0591	12.4873	54.9513	200.615	85.4054	65.0417
MGAL_10B049627	442.714	388.352	271.451	302.816	467.973	460.078	416.979	344.245
MGAL_10B019982	3150.16	4192.84	3283.68	4434.54	2187.42	4406.85	2830.1	3102.17
MGAL_10NCA041403	1585.9	1448.53	1252.18	1698.27	600.033	1909.86	1219.12	997.042
MGAL_10B082802	1246.49	1311.73	686.757	1075.47	764.001	1203.69	1267.68	1200.89
MGAL_10B007668	726.051	520.59	405.299	449.542	454.678	460.078	507.409	488.606
MGAL_10B027611	845.092	1016.86	781.828	304.377	645.235	592.484	713.387	1089.05
MGAL_10B051626	268.58	453.711	276.454	76.4845	452.019	279.524	267.101	773.362
MGAL_10B044958	1699.04	2700.99	2282.94	1768.51	1322.38	1170.26	1631.08	2028.98
MGAL_10B038110	348.269	281.954	730.54	296.573	776.409	1468.5	286.359	210.989
MGAL_10B074634	1419.64	2421.31	705.521	799.185	2073.97	692.791	1391.61	1037.49
MGAL_10B092483	1399.96	2681.23	3027.24	2244.59	2687.3	1833.62	2555.46	4029.41
MGAL_10NCA047527	159.377	98.798	200.148	221.649	288.938	133.744	145.692	157.052
MGAL_10B050667	1827.92	1469.81	2320.46	1732.61	1301.11	1064.6	1111.95	1442.02
MGAL_10B025080	421.07	179.356	111.332	312.182	324.39	48.1477	223.561	97.5626
MGAL_10B014960	458.455	308.554	235.174	224.771	242.849	149.793	205.141	160.225
MGAL_10B077324	759.501	740.985	187.639	127.994	152.446	406.58	137.319	157.052
MGAL_10B085091	918.878	705.266	1633.71	2157.17	572.557	949.579	631.33	1043.84
MGAL_10B040872	82.64	37.9992	72.5536	103.02	60.2692	69.5466	70.3339	263.34
MGAL_10B052992	84.6076	57.7588	95.0702	65.5581	121.425	149.793	117.223	118.186
MGAL_10B024861	51.1581	333.633	242.679	174.822	47.8608	89.6082	209.327	172.916
MGAL_10B085987	1156.96	1839.16	761.813	858.499	1676.9	1024.48	2088.25	561.58
MGAL_10B089677	980.858	1199.26	605.447	803.868	1059.14	1382.91	1164.7	853.474
MGAL_10B050324	491.905	960.621	512.879	986.494	654.098	387.856	1155.49	1135.85
MGAL_10B072548	116.09	77.5184	127.594	118.629	77.9954	106.995	118.898	141.188
MGAL_10B046955	408.281	1580.77	723.034	643.094	1407.46	1551.42	631.33	1630.8
MGAL_10B028090	101.332	394.432	72.5536	117.068	266.78	56.1723	255.379	220.507
MGAL_10B062086	34.4333	132.237	130.096	218.527	23.0441	0	565.183	262.546
MGAL_10NCA003225	5371.6	4838.06	4133.05	2784.66	3667.56	5416.61	5435.8	4638.58
MGAL_10NCA003226	7386.44	6082.92	5353.96	3719.64	5356.87	6065.27	5885.44	5595.97
MGAL_10B076072	10089.9	9197.34	7999.66	8238.47	8715.99	10040.1	9518.52	8587.88
MGAL_10B077456	19.6762	246.235	75.0555	104.581	97.4943	80.2461	13.3969	123.738
MGAL_10B062741	238.082	176.316	130.096	246.623	152.446	363.782	97.1277	179.261
MGAL_10B025849	1593.77	2514.03	2448.06	799.185	3254.54	1358.83	3901.86	1664.91
MGAL_10NCA007985	103.3	0.759985	140.104	0	306.664	155.142	634.68	88.0443
MGAL_10NCA007986	160.361	0	161.369	0	466.2	211.315	408.606	111.047
MGAL_10B090436	155.442	1.51997	107.579	0	267.666	201.953	238.633	23.7957
MGAL_10B052227	732.938	132.237	261.443	24.9745	1093.71	1009.76	944.484	205.437
MGAL_10B034013	1318.3	1518.45	1703.76	958.398	1692.86	2396.68	1297.83	1703.78
MGAL_10B093114	5513.27	7694.85	6092	4173.87	6009.19	7408.05	6508.4	6050.46
MGAL_10B071376	2215.54	3084.02	2249.16	2812.76	1676.9	1805.54	2280.83	2081.33
MGAL_10B042612	4517.65	2659.95	3872.86	2082.25	3467.25	4980.61	3838.22	2500.14
MGAL_10B016605	351.22	245.475	492.864	277.842	348.32	454.728	255.379	266.512
MGAL_10B013385	236.114	250.795	297.72	221.649	395.295	288.886	224.399	314.104
MGAL_10B026706	55.0933	138.317	365.27	162.334	38.9977	112.345	46.8893	107.874
MGAL_10B027463	848.044	1209.9	1688.75	821.038	1146.89	1293.3	1135.39	2096.41
MGAL_10B062199	1955.81	6450.75	3782.79	5644.24	3021.44	6676.48	1187.3	1289.73
MGAL_10B002284	284.321	657.387	716.78	215.405	645.235	240.738	107.175	299.826
MGAL_10B017451	117.073	117.038	210.155	124.873	422.771	219.339	210.164	163.397
MGAL_10B026664	388.605	183.156	646.728	526.026	657.643	355.758	872.475	513.988
MGAL_10B045938	3858.5	6079.12	3082.28	2388.19	5278.87	6144.18	7741.75	3996.1
MGAL_10B016883	598.156	913.502	1058.28	2366.34	829.588	569.747	1331.32	571.098
MGAL_10B010914	224.309	129.957	150.111	121.751	87.7448	88.2707	159.926	232.405
MGAL_10NCA022849	181.021	212.036	126.343	74.9236	119.652	258.125	277.149	157.052
MGAL_10B091265	1753.15	2495.79	1840.11	1276.82	1365.81	1986.09	2319.34	3395.65
MGAL_10B060459	66.899	33.4393	62.5462	103.02	83.3133	115.019	65.31	125.324
MGAL_10B067266	3459.07	2577.87	3239.89	3009.43	3307.71	3669.92	924.388	1884.62
MGAL_10B069497	47.2229	54.7189	105.078	90.5327	129.401	109.67	100.477	193.539
MGAL_10B040329	76.7371	78.2784	133.849	96.7763	203.852	115.019	20.9327	116.599
MGAL_10B023333	31.4819	3.03994	67.5499	81.1672	99.2669	149.793	77.0324	49.1779
MGAL_10B042068	365.977	604.948	675.499	764.845	654.098	552.361	689.942	580.616
MGAL_10B083836	877.558	1023.7	450.333	590.023	895.175	1604.92	1327.97	510.815
MGAL_10B016478	334.495	509.19	252.687	152.969	182.58	104.32	259.566	207.023
MGAL_10NCA072645	305.965	766.065	220.163	477.638	558.376	470.777	822.237	628.208
MGAL_10B047916	1570.16	1191.66	1486.1	1610.86	1364.92	1543.4	1396.63	1096.19
MGAL_10B091893	247.92	171.757	147.609	106.142	606.237	259.462	174.16	277.617
MGAL_10B003680	143.636	98.798	130.096	137.36	106.357	216.665	192.581	106.288
MGAL_10B068726	4557.01	4730.91	3047.25	7631.28	5311.67	4503.14	4094.44	3118.83
MGAL_10B032995	700.472	507.67	903.167	483.881	687.778	896.082	897.594	810.642
MGAL_10B010770	5772.99	7033.66	3929.15	2508.38	6423.1	6446.44	6384.47	5322.31
MGAL_10B052489	655.217	583.668	637.971	1239.36	767.546	444.029	741.855	688.49
MGAL_10NCA065588	57.0609	129.197	399.045	70.2409	155.991	74.8964	174.16	101.529
MGAL_10B072927	45227.7	24544.5	40972.8	32267.1	41534.3	45050.2	26129	29789.9
MGAL_10B075807	269.564	1041.18	1368.51	1838.75	1151.32	995.052	319.852	385.491
MGAL_10B048753	3772.91	2958.62	4150.57	4606.24	4022.08	2985.16	3355.93	3648.68
MGAL_10B088390	3059.65	1842.96	2954.68	1629.59	2408.99	2634.75	2538.72	2930.84
MGAL_10NCA047545	470.261	55.4789	150.111	4.68272	177.262	161.83	246.169	749.566
MGAL_10B089122	344.333	252.315	370.274	383.983	389.977	306.273	470.567	458.465
MGAL_10NCA052853	52.1419	167.197	23.7676	76.4845	56.7239	12.0369	194.255	149.12
MGAL_10B091063	147.571	25.0795	105.078	309.06	207.397	440.016	28.4685	34.9004
MGAL_10B010885	829.351	517.55	1582.42	920.936	2502.06	1023.14	1405.84	1185.82
MGAL_10B040265	4629.81	1016.1	5786.78	2839.29	6520.59	5645.31	2568.86	1821.17
MGAL_10NCA060090	1692.15	1913.64	1189.63	824.159	1340.99	2163.97	1877.24	1591.94
MGAL_10B021662	3840.79	4108.48	3737.76	4131.72	3264.29	4012.31	4064.29	3701.82
MGAL_10B077748	147.571	82.0784	97.5721	53.0709	94.8353	112.345	135.644	80.9055
MGAL_10B023347	311.868	146.677	140.104	505.734	184.353	82.921	206.815	222.094
MGAL_10B042136	467.309	221.156	232.672	864.743	200.306	66.8718	283.847	368.041
MGAL_10B053264	194.794	363.273	107.579	99.8981	1.77262	318.31	418.654	163.397
MGAL_10B008084	293.175	535.789	307.727	398.032	101.04	296.911	591.977	432.289
MGAL_10B069192	1461.94	1570.89	1589.92	1626.47	1869.23	1443.09	1843.75	1838.62
MGAL_10B080881	697.521	750.865	345.255	346.522	559.263	933.53	516.619	647.244
MGAL_10B023271	729.987	1384.69	731.791	713.335	797.68	579.109	1525.58	1056.53
MGAL_10B008673	540.111	66.8787	577.927	505.734	623.963	773.038	770.324	579.03
MGAL_10B045268	3028.17	2748.11	3161.09	4315.91	2247.69	2567.88	1970.19	2462.86
MGAL_10B086630	7971.81	6846.7	5694.21	5307.09	9311.59	6437.08	7842.23	7030.06
MGAL_10NCA006806	1295.68	710.586	1313.47	1308.04	1646.77	603.183	2300.92	2654.81
MGAL_10B080411	98.3809	709.826	215.159	287.207	284.506	553.698	1013.14	157.052
MGAL_10B073866	310.884	167.197	317.735	596.267	615.987	312.96	284.685	352.177
MGAL_10B023465	2396.56	2945.7	1215.9	3000.07	2255.66	2113.15	2269.11	1754.54
MGAL_10B040213	206.6	130.717	120.089	109.264	182.58	98.9702	108.85	144.361
MGAL_10B093332	1920.4	2678.95	3791.55	3115.57	3007.26	2546.48	1667.92	3244.15
MGAL_10NCA003258	113.138	107.158	275.203	145.164	170.172	123.044	231.934	251.442
MGAL_10NCA003259	93.4619	25.8395	186.388	87.4108	217.146	144.443	155.739	168.95
MGAL_10B044338	27042	32367	24753.3	24072.3	30829.5	28226.6	29347.7	30392.7
MGAL_10B074194	8917.25	7252.53	7409.22	10915.4	6751.04	8153.01	6481.6	6966.6
MGAL_10NCA003262	605.043	1030.54	332.746	1169.12	818.066	744.951	1210.75	1124.75
MGAL_10NCA003263	97.3971	1450.81	1438.56	1709.19	3618.81	1182.29	3293.97	1749.78
MGAL_10B004158	3414.8	5171.7	3113.55	596.267	6561.36	6478.54	2973.28	7663.82
MGAL_10NCA021417	1943.02	1971.4	1014.5	496.369	2238.82	1385.58	1679.64	2423.99
MGAL_10B065833	6314.09	5272.77	7083.98	4220.7	4194.03	7917.62	4989.52	7585.29
MGAL_10B034790	8073.14	7101.3	6556.09	4865.35	6725.33	9073.16	6802.29	7385.41
MGAL_10NCA021416	172.167	141.357	116.336	791.38	175.49	98.9702	727.621	100.735
MGAL_10B072550	25157	27950	33917.6	44524.9	31059.9	20406.6	24251.8	25210
MGAL_10B024828	751.63	69.9186	357.764	218.527	671.824	34.7733	579.417	256.201
MGAL_10B024829	660.136	58.5188	316.484	199.796	584.079	25.4113	511.595	198.298
MGAL_10B069306	448.617	340.473	454.085	727.383	617.759	373.144	483.964	263.34
MGAL_10B092220	216.438	149.717	72.5536	106.142	153.332	117.694	187.557	148.327
MGAL_10B056052	861.817	1073.1	328.993	593.145	1060.03	1206.37	705.851	731.323
MGAL_10B006490	3915.56	5488.61	4590.89	3693.11	4030.94	4651.6	5105.91	4441.87
MGAL_10B093231	4179.22	3361.41	4258.15	5931.45	2611.07	3752.84	4635.34	2051.19
MGAL_10B035027	1304.53	1296.53	1821.35	2116.59	1359.6	1789.49	1273.55	1914.76
MGAL_10B093906	895.267	562.389	1299.71	758.601	544.195	700.816	763.625	1062.88
MGAL_10B091078	43063.3	40473.8	46032.8	51805	38699	35328.4	39489.1	35841.2
MGAL_10B090278	310.884	337.433	300.222	443.298	234.873	262.137	103.826	437.842
MGAL_10B051064	2524.45	2032.2	2879.63	3209.23	2405.45	1398.96	1810.26	2030.57
MGAL_10B078375	511.581	1685.65	342.753	471.394	845.541	264.812	641.378	329.968
MGAL_10B022338	3577.13	2828.66	6837.55	3355.95	3066.64	5598.5	4251.85	2390.68
MGAL_10B026335	2374.92	2193.32	3174.85	3215.47	2114.74	2070.35	2230.59	2444.62
MGAL_10B033249	3474.81	6191.6	4473.3	3802.37	4933.21	4583.39	6001.83	4592.58
MGAL_10B004418	2418.2	3478.45	4682.21	4635.9	6055.28	3208.51	6772.99	3969.13
MGAL_10B051227	222681	262137	85758.4	79309.7	257306	265061	265010	180471
MGAL_10B021702	50.1743	264.475	367.772	12.4873	222.464	397.218	51.9131	26.1753
MGAL_10B037322	269.564	161.117	152.613	218.527	246.395	224.689	485.639	230.026
MGAL_10B081620	503.71	625.467	784.329	825.72	631.94	654.006	828.098	1072.39
MGAL_10NCA039225	286.289	193.796	83.8119	149.847	7.09049	4.01231	0	48.3847
MGAL_10NCA039226	253.823	185.436	70.0518	142.043	7.09049	4.01231	0	44.4187
MGAL_10B068133	1381.27	3103.78	2927.16	2478.72	2568.53	1051.22	1267.68	2882.46
MGAL_10B052860	784.096	1091.34	1073.29	852.256	786.158	1192.99	1053.33	602.826
MGAL_10B059612	1940.07	2298.19	1327.23	2104.1	1819.6	2032.9	2307.62	1998.84
MGAL_10B092616	525.354	505.39	559.163	1289.31	527.355	569.747	659.799	295.067
MGAL_10NCA047566	253.823	208.236	225.166	357.448	278.302	234.051	220.212	137.222
MGAL_10NCA047567	165.28	214.316	227.668	338.717	82.427	222.014	100.477	145.154
MGAL_10NCA047572	121.009	77.5184	128.845	146.725	3.54525	82.921	200.954	84.8715
MGAL_10B005186	7772.09	8984.54	8122.25	8335.25	10580.8	9502.48	9845.07	8866.29
MGAL_10B017443	550.933	386.072	320.237	249.745	404.158	651.331	406.094	469.569
MGAL_10B088221	157.41	139.837	80.0591	131.116	17.7262	8.02461	17.5835	38.0732
MGAL_10B044042	165.28	74.4785	167.624	177.944	81.5407	93.6205	189.232	87.2511
MGAL_10B073436	2638.58	2707.07	1638.71	1442.28	3502.7	3354.29	3808.08	3063.31
MGAL_10B004963	306.949	337.433	290.214	274.72	304.891	262.137	1088.5	160.225
MGAL_10B087040	1084.16	503.11	637.971	811.672	129.401	449.378	56.937	433.876
MGAL_10B027677	1587.87	806.344	1406.04	3577.6	1557.25	2035.58	668.172	1402.36
MGAL_10B080878	1814.14	1967.6	2154.09	2572.38	1365.81	2402.03	2055.59	2707.96
MGAL_10B001144	1669.52	1816.36	3745.27	1651.44	3752.64	3134.95	2779.03	1154.09
MGAL_10B035565	9900.07	9173.78	9399.44	14001.3	6904.37	9747.23	8584.08	6424.85
MGAL_10B002447	28531.5	24424.4	23322.2	20437	18968	28508.8	17948.5	25801.7
MGAL_10B055358	28970.2	38502.3	47558.9	52418.4	36596.7	36992.1	34899.8	43777.8
MGAL_10B068071	7136.55	9841.04	5311.42	4665.55	7515.04	6980.07	7428.6	7521.04
MGAL_10B011447	4850.18	7779.2	4374.48	3694.67	4011.45	3262	4652.92	8052.48
MGAL_10B056088	18709.1	8723.87	35062.2	41869.8	32018.9	10540.3	27534	22751.9
MGAL_10B069530	1838.74	1557.21	1937.68	591.584	2880.51	811.823	1909.9	2188.42
MGAL_10NCA003293	54.1095	186.956	60.0444	78.0454	129.401	448.041	468.055	60.2826
MGAL_10B026844	43.2876	7808.08	67.5499	78.0454	335.026	177.879	45.2146	45.2119
MGAL_10NCA003294	1282.89	1567.85	345.255	115.507	1477.48	1986.09	912.666	2562.8
MGAL_10NCA003295	781.145	3665.41	346.506	53.0709	967.852	933.53	415.305	829.678
MGAL_10B011292	444.682	495.51	372.775	190.431	726.775	565.735	470.567	687.697
MGAL_10B094458	336.463	825.343	202.65	658.703	395.295	655.343	227.748	477.501
MGAL_10B038844	2803.86	3181.3	3683.97	2311.7	3277.58	3295.44	3829.85	2982.4
MGAL_10B033196	670.958	573.029	567.92	721.14	455.564	663.368	1234.19	308.551
MGAL_10B090326	338.43	1.51997	2.50185	140.482	0.886312	131.069	437.912	195.125
MGAL_10B092641	167.248	138.317	67.5499	458.907	1488.12	58.8472	741.855	504.47
MGAL_10B030312	349.252	443.071	550.407	276.281	648.78	522.937	527.504	387.871
MGAL_10B009132	473.212	365.553	392.79	151.408	508.743	224.689	583.604	1183.44
MGAL_10B072936	9135.65	8663.83	6702.45	8909.66	4614.14	3675.27	4146.35	5693.53
MGAL_10B029301	2284.41	162.637	828.112	56.1927	501.652	711.516	194.255	89.6306
MGAL_10B017737	127.895	142.877	127.594	140.482	72.6775	219.339	85.4054	158.638
MGAL_10B040440	10337.9	8327.91	9166.77	4526.63	11787.9	8816.37	8552.27	9986.28
MGAL_10B001828	770.323	749.345	850.628	1258.09	717.912	604.521	501.548	809.055
MGAL_10NCA016025	139.701	231.795	267.698	324.669	277.416	204.628	182.533	233.991
MGAL_10B054415	1694.12	1320.85	1300.96	1311.16	2444.45	1790.83	2245.66	1702.19
MGAL_10B016256	25651.8	26928.5	20465.1	25680.1	23038.8	17715.7	28714.6	24381.1
MGAL_10B051977	832.303	527.429	142.605	212.283	209.17	358.433	319.014	459.258
MGAL_10B042273	432.876	1067.78	355.262	1273.7	938.604	468.102	862.427	1616.52
MGAL_10B092287	1924.33	1491.09	1143.34	1117.61	1722.99	1776.11	2481.78	1572.11
MGAL_10B058849	2544.13	1846.76	1631.21	1333.02	2091.7	1789.49	1813.61	1873.52
MGAL_10B090689	3921.46	4387.39	4265.65	4532.88	5443.73	4782.67	5819.29	4334.79
MGAL_10NCA026175	277.434	45.5991	225.166	78.0454	453.792	61.522	50.2385	219.714
MGAL_10B063123	11225.3	12342.2	9737.19	6758.73	8607.86	7436.14	9480	10377.3
MGAL_10B042601	2361.14	2243.48	2036.5	2631.69	2369.11	1629	1944.23	1608.59
MGAL_10B026600	295.143	459.791	365.27	321.547	324.39	286.211	467.218	207.816
MGAL_10B010035	248.904	392.152	220.163	204.479	140.037	306.273	779.534	342.659
MGAL_10B059668	84.6076	517.55	607.949	21.8527	95.7216	44.1354	1249.26	285.549
MGAL_10B023824	1969.59	1194.7	1963.95	1720.12	2212.23	1789.49	1637.77	2460.48
MGAL_10B047106	1141.22	337.433	799.341	989.616	950.126	965.628	947.833	842.369
MGAL_10B086790	1200.25	3807.52	1343.49	1826.26	2030.54	1166.24	2949	2550.9
MGAL_10B023093	85.5914	6.07988	31.2731	74.9236	248.167	77.5712	103.826	44.4187
MGAL_10B013735	415.168	75.9985	512.879	176.383	216.26	203.29	77.0324	148.327
MGAL_10B066902	19.6762	6.07988	22.5166	610.315	193.216	625.92	464.706	46.0051
MGAL_10B009488	322.689	372.393	110.081	124.873	15.9536	0	378.463	196.711
MGAL_10B091568	47.2229	176.316	102.576	177.944	42.543	34.7733	28.4685	6.34553
MGAL_10B035934	672.926	1381.65	735.543	964.641	613.328	529.624	1373.19	797.157
MGAL_10B086011	166.264	158.077	402.798	632.168	241.077	283.536	238.633	171.329
MGAL_10B009541	1381.27	1463.73	1371.01	21.8527	1083.07	72.2215	1425.1	1759.3
MGAL_10B039327	1465.88	3798.4	863.138	2494.33	1777.05	3068.08	2150.21	3215.6
MGAL_10B064317	153.474	31.9194	62.5462	62.4363	88.6312	208.64	98.8024	103.908
MGAL_10B056067	4295.31	3343.17	5714.22	5278.99	5659.99	3750.17	3680.81	2401.78
MGAL_10NCA050507	3649.93	1501.73	738.045	3764.91	990.896	2444.83	4096.95	3221.15
MGAL_10NCA050508	2324.74	1041.94	280.207	1944.89	487.471	1259.86	3203.54	2070.23
MGAL_10B071696	2699.57	4637.43	2525.62	3327.86	3344.94	5074.23	4792.75	3885.05
MGAL_10NCA050506	100.349	28.1194	75.0555	90.5327	46.0882	104.32	209.327	67.4213
MGAL_10NCA043600	78.7048	34.9593	102.576	215.405	329.708	88.2707	343.296	191.952
MGAL_10NCA043601	606.027	948.461	472.849	343.4	717.026	236.726	597.001	452.119
MGAL_10B019645	74.7695	0	166.373	307.499	519.379	85.5959	233.609	91.217
MGAL_10B067499	57.0609	129.197	70.0518	12.4873	26.5893	407.918	135.644	138.015
MGAL_10B046066	312.851	293.354	534.145	1136.34	204.738	329.009	202.629	364.868
MGAL_10NCA057353	185.94	553.269	157.616	113.946	156.877	526.949	126.434	208.609
MGAL_10B080228	139.701	308.554	228.919	149.847	261.462	120.369	583.604	176.882
MGAL_10B045425	66.899	130.717	126.343	43.7054	46.0882	62.8595	242.819	50.7643
MGAL_10B074322	702.44	348.073	97.5721	412.08	239.304	430.654	75.3577	160.225
MGAL_10B082596	100.349	327.553	153.864	246.623	177.262	66.8718	294.732	57.1098
MGAL_10B010364	5751.35	4157.12	3802.81	2010.45	4078.81	4432.26	2634.17	3712.14
MGAL_10B068053	643.411	305.514	665.492	661.825	725.003	401.231	821.399	326.002
MGAL_10NCA071955	3069.49	4170.8	3540.12	2572.38	2687.3	3322.19	2477.59	4190.43
MGAL_10B062469	1598.69	2574.07	2759.54	6484.01	3639.2	3109.54	2194.58	4314.96
MGAL_10NCA003305	417.135	1560.25	1344.74	697.726	1968.5	1047.21	292.221	1665.7
MGAL_10NCA003306	32.4657	197.596	167.624	74.9236	224.237	508.225	42.7027	476.708
MGAL_10NCA003307	22.6276	115.518	236.425	82.7281	119.652	320.984	17.5835	370.42
MGAL_10B036374	412.216	177.836	20.0148	31.2182	224.237	337.034	5.02385	404.528
MGAL_10B009169	631.606	229.515	25.0185	15.6091	77.9954	264.812	8.37308	185.607
MGAL_10B004389	2044.36	3286.17	5958.15	2950.12	1258.56	1378.9	1466.96	1831.48
MGAL_10B077546	1709.86	3759.64	805.595	1178.49	1654.74	1793.5	2179.51	2511.24
MGAL_10NCA003327	392.54	1370.25	231.421	368.374	482.153	181.891	571.044	1553.86
MGAL_10B021435	12093	9499.05	12226.5	17435.3	12794.8	8891.27	10579.4	8927.37
MGAL_10B088009	1883.01	2669.07	2559.39	3711.84	3593.99	2589.27	2465.04	4229.3
MGAL_10NCA012136	68.8667	164.917	345.255	142.043	145.355	96.2953	36.0043	127.704
MGAL_10NCA012137	65.9152	104.878	333.997	132.677	123.197	85.5959	31.8177	117.392
MGAL_10B012368	9363.9	10765.9	6382.22	5091.68	9490.62	10573.8	10158.2	7613.05
MGAL_10B004683	8942.83	7727.53	10918.1	11113.7	7687.87	10255.5	7107.07	6835.72
MGAL_10B032808	1928.27	866.383	970.717	850.695	1408.35	813.161	1397.47	1112.85
MGAL_10B008599	1144.17	1209.9	1010.75	1281.51	1123.84	732.915	1127.85	805.883
MGAL_10B022628	2196.85	1979	1491.1	1717	2177.67	1126.12	1857.99	935.966
MGAL_10B045191	888.38	659.667	241.428	604.071	725.889	690.117	657.287	210.989
MGAL_10B015778	37190	48950.6	15546.5	37719.3	19614.1	39596.1	40323.1	4816.26
MGAL_10B038756	334.495	50.159	37.5277	204.479	29.2483	397.218	408.606	34.9004
MGAL_10NCA056299	253.823	91.1982	100.074	40.5836	23.0441	171.192	73.6831	57.903
MGAL_10B009280	1166.8	775.184	935.691	184.187	1207.16	2608	1582.51	1452.33
MGAL_10B032723	107.235	193.036	630.466	193.553	703.731	505.551	574.393	366.454
MGAL_10B062589	2006.97	1339.09	1941.43	2416.29	1889.62	1594.22	2375.44	2076.58
MGAL_10B017139	465.342	835.983	790.584	477.638	491.017	748.964	600.35	920.895
MGAL_10B040762	1853.5	1499.45	1698.76	1142.58	2139.56	1678.48	2171.98	1411.88
MGAL_10B031346	155.442	285.754	512.879	471.394	1276.29	326.334	234.446	231.612
MGAL_10B002477	95.4295	56.9989	177.631	123.312	94.8353	41.4605	41.0281	99.9421
MGAL_10NCA022870	25825	27799.5	22546.7	22900.1	28433.8	24572.7	27255.2	30751.2
MGAL_10NCA022871	25825	27799.5	22546.7	22900.1	28433.8	24572.7	27255.2	30751.2
MGAL_10B028873	24278.4	22692.4	23872.6	26084.3	23538.7	23136.3	20101.3	21516.9
MGAL_10NCA022872	187.908	130.717	97.5721	24.9745	37.2251	141.768	34.3296	60.2826
MGAL_10NCA029157	171.183	245.475	345.255	49.9491	46.9745	82.921	272.962	115.806
MGAL_10B079823	161.345	3.03994	335.248	202.918	382.887	104.32	463.869	96.7694
MGAL_10B070651	159.377	59.2788	307.727	146.725	249.054	72.2215	210.164	39.6596
MGAL_10B064867	606.027	805.584	1058.28	1389.21	320.845	115.019	797.117	1023.22
MGAL_10B082227	1513.1	1703.89	740.547	1189.41	834.905	818.51	607.886	718.631
MGAL_10NCA039245	279.402	54.7189	172.628	78.0454	24.8167	25.4113	515.782	125.324
MGAL_10B020347	144.62	197.596	60.0444	149.847	93.949	115.019	80.3816	141.981
MGAL_10B007960	474.196	391.392	542.901	359.009	841.11	575.097	294.732	363.282
MGAL_10NCA041454	188.891	408.112	247.683	121.751	299.573	353.083	157.414	193.539
MGAL_10NCA043604	101.332	137.557	202.65	87.4108	85.0859	167.179	161.6	172.123
MGAL_10B011985	2019.76	1840.68	3456.3	2538.04	2389.5	3714.06	2591.47	2612.77
[truncated: 13,827 more rows]

## Sheet: Suppl. Table 5
Supplementary Table 5: Differentially expressed features between female- and male-biased samples. Table reports the median expression across female-biased samples (F_mean), male-biased samples (M_mean), the coefficient of variation across biological replicates (theta), the False Discaovery Rate (prob), and the log2 of the Fold Change (log2FC). Last two columns are Rho and p-value of the correlati…
Feature	F_mean	M_mean	theta	prob	log2FC	Spearman's Rho	Spearman's p-value
MGAL_10NCA010047	527.026	7.8568	2.47948	1	6.06779	-0.642857	0.0961806
MGAL_10B037200	1062.03	11.0799	2.44372	1	6.58273	-0.738095	0.0458333
MGAL_10NCA061036	167.477	1.97256	2.11897	1	6.40775	-0.19162	0.64941
MGAL_10B042856	6291.38	12.7281	3.56777	1	8.94921	-0.880952	0.00724206
MGAL_10NCA064528	734.651	0.96051	2.4506	1	9.57904	-0.355142	0.38798
MGAL_10B047318	29465	17394.6	2.12138	1	0.760363	-0.761905	0.036756
MGAL_10NCA046210	5.87106	553.455	-2.35601	1	-6.5587	0.309524	0.461806
MGAL_10NCA025025	986.135	7.04575	2.11186	1	7.12889	-0.479051	0.229741
MGAL_10NCA069327	12.8019	673.873	-2.32406	1	-5.71804	0.785714	0.0279266
MGAL_10B077591	5.55747	525.474	-2.37236	1	-6.56305	0.467074	0.24327
MGAL_10NCA034218	11.4589	601.653	-2.32432	1	-5.7144	0.690476	0.0693948
MGAL_10NCA065233	0.113891	220.902	-4.39615	1	-10.9215	0.913223	0.00152914
MGAL_10NCA015414	0.113891	97.1284	-3.72597	1	-9.7361	0.684917	0.0608858
MGAL_10NCA025027	266.59	0.0963562	4.37012	1	11.434	-0.627376	0.0958914
MGAL_10NCA065232	0.113891	193.599	-4.40248	1	-10.7312	0.913223	0.00152914
MGAL_10NCA039924	0.113891	406.313	-4.31013	1	-11.8007	0.463713	0.247138
MGAL_10B055288	309.286	0.0963562	4.37256	1	11.6483	-0.811754	0.0144111
MGAL_10NCA067585	0.113891	170.89	-3.76931	1	-10.5512	0.872872	0.00465921
MGAL_10NCA025028	293.201	0.0963562	4.4325	1	11.5712	-0.627376	0.0958914
MGAL_10NCA064527	670.348	0.0963562	4.89183	1	12.7642	-0.518267	0.188236
MGAL_10B004966	0.5812	514.112	-2.74838	1	-9.78883	0.756323	0.0298844
MGAL_10NCA010049	722.785	0.0963562	4.94901	1	12.8729	-0.786387	0.020631
MGAL_10NCA026859	124.726	0.397279	2.04364	1	8.29439	-0.507346	0.199359
MGAL_10B052964	144.599	3.13897	2.02266	0.999999	5.52562	-0.857143	0.0107143
MGAL_10NCA000409	171.006	1.73387	2.01241	0.999993	6.62391	-0.610789	0.107721
MGAL_10B026551	30423.2	13171.5	1.82499	0.999912	1.20775	-0.52381	0.196627
MGAL_10B061520	3818.99	694.135	1.9963	0.999897	2.4599	-0.761905	0.036756
MGAL_10NCA025026	1285.31	29.7425	1.9961	0.999894	5.43345	-0.714286	0.0575893
MGAL_10NCA026304	20300.1	7507.59	1.82854	0.999847	1.43506	-0.404762	0.326835
MGAL_10NCA047620	9.17694	461.442	-2.01023	0.996262	-5.65199	0.261905	0.536409
MGAL_10B007988	38588.2	27135.5	1.7533	0.993008	0.507979	-0.738095	0.0458333
MGAL_10B040111	3396.62	739.914	1.56338	0.983732	2.19867	-0.952381	0.00114087
MGAL_10B072936	8352.9	4532.32	1.56797	0.9834	0.882027	-0.761905	0.036756
MGAL_10B019106	62519.2	40342.6	1.23785	0.980627	0.631995	-0.595238	0.132292
MGAL_10B059751	61145.4	43572.9	1.24585	0.98043	0.488814	-0.642857	0.0961806
MGAL_10B072029	60103.1	47597.5	1.24586	0.980428	0.336554	-0.333333	0.427877
MGAL_10NCA019234	367.023	51.8567	1.23458	0.97983	2.82327	-0.761905	0.036756
MGAL_10NCA059039	105118	47387.7	1.23431	0.97975	1.14943	-0.571429	0.151141
MGAL_10B068290	56312.6	40272.6	1.2342	0.979718	0.48366	-0.642857	0.0961806
MGAL_10B057936	21657.5	8591.99	1.8718	0.979645	1.3338	-0.404762	0.326835
MGAL_10B084019	44032.2	31205.9	1.23296	0.979281	0.49674	-0.809524	0.0217758
MGAL_10B040765	4946.73	909.392	1.25037	0.978873	2.4435	-0.571429	0.151141
MGAL_10NCA059037	244914	104660	1.55089	0.97809	1.22657	-0.547619	0.170982
MGAL_10B091078	45343.7	37339.4	1.25271	0.977658	0.280203	-0.857143	0.0107143
MGAL_10B070111	8044.46	3985.36	1.22588	0.975987	1.01329	-0.785714	0.0279266
MGAL_10B062921	7137.89	3679.4	1.58119	0.975624	0.956027	-0.833333	0.015377
MGAL_10B092103	5880.93	2390.93	1.25662	0.975016	1.29847	-0.52381	0.196627
MGAL_10B073840	30780.8	17303.7	1.73501	0.974848	0.830952	-0.928571	0.00223214
MGAL_10B081579	8624.45	4963.41	1.22331	0.974553	0.7971	-0.595238	0.132292
MGAL_10B054831	9795.72	5369.29	1.54649	0.974131	0.867418	-0.928571	0.00223214
MGAL_10B002920	40647.9	22566.3	1.22217	0.973903	0.84901	-0.785714	0.0279266
MGAL_10B003489	3.03374	207.423	-2.13227	0.973895	-6.09533	0.857143	0.0107143
MGAL_10B017310	15825.9	9165.81	1.25934	0.972787	0.787953	-0.690476	0.0693948
MGAL_10B045046	23930.2	16943.8	1.26178	0.970542	0.498072	-0.642857	0.0961806
MGAL_10B014964	1168.12	96.1741	1.26238	0.969954	3.6024	-0.547619	0.170982
MGAL_10NCA052169	148.808	11.1171	1.58705	0.969615	3.74259	-0.880952	0.00724206
MGAL_10B011781	15507.5	9939.68	1.2144	0.969568	0.641696	-0.857143	0.0107143
MGAL_10B076686	21003.8	10517.7	1.58739	0.969242	0.997832	-0.738095	0.0458333
MGAL_10B034729	10098	6900.26	1.2641	0.968219	0.549348	-0.857143	0.0107143
MGAL_10B056882	25228.8	19053.9	1.26468	0.967609	0.404987	-0.714286	0.0575893
MGAL_10B044223	148.032	12.1634	1.26519	0.967068	3.60529	-0.666667	0.0830853
MGAL_10B092209	4238.47	7803.53	-1.5914	0.966999	-0.880585	0.666667	0.0830853
MGAL_10NCA019758	2861.4	653.568	1.20549	0.965736	2.13031	-0.547619	0.170982
MGAL_10B016228	10497.4	5828.96	1.20245	0.964838	0.848722	-0.785714	0.0279266
MGAL_10B004323	10007.3	15136	-1.58009	0.964387	-0.596922	0.857143	0.0107143
MGAL_10NCA023539	346.722	19.8383	1.39935	0.963905	4.12741	-0.857143	0.0107143
MGAL_10B082434	1214.71	238.022	1.19729	0.963749	2.35145	-0.785714	0.0279266
MGAL_10B010742	14917.8	8923.8	1.26826	0.963683	0.741307	-0.761905	0.036756
MGAL_10B051571	22450	15073.9	1.19352	0.963209	0.574665	-0.642857	0.0961806
MGAL_10B061956	21873.3	15188.8	1.19144	0.962967	0.526163	-0.809524	0.0217758
MGAL_10B089237	56223.7	35853.5	1.19046	0.96286	0.649064	-0.738095	0.0458333
MGAL_10B045365	31408.5	18133.1	1.19025	0.962837	0.792533	-0.738095	0.0458333
MGAL_10B025840	2111.24	292.89	1.59284	0.962793	2.84966	-0.52381	0.196627
MGAL_10B078064	7.77301e+06	4.82165e+06	1.18953	0.962761	0.688945	-0.880952	0.00724206
MGAL_10B079776	45700	35967	1.18878	0.962681	0.345521	-0.761905	0.036756
MGAL_10B084035	3996.21	2372.64	0.947555	0.96245	0.752138	-0.738095	0.0458333
MGAL_10NCA061037	143.123	20.5312	0.94743	0.962448	2.80137	-0.404762	0.326835
MGAL_10B043706	13075.7	8812.6	0.947337	0.962447	0.569247	-0.571429	0.151141
MGAL_10B076863	18391.5	11982.9	0.948126	0.962447	0.618067	-0.571429	0.151141
MGAL_10B042510	8595.83	5747.16	0.94861	0.962443	0.580786	-0.833333	0.015377
MGAL_10B024921	14069.5	8627.11	0.946601	0.96244	0.705624	-0.809524	0.0217758
MGAL_10B001309	1498.56	689.679	0.949324	0.962437	1.11958	-0.857143	0.0107143
MGAL_10B029243	64002.4	50801.8	0.950259	0.962415	0.333246	-0.595238	0.132292
MGAL_10B004609	13114.6	9667.29	0.945051	0.962409	0.439991	-0.595238	0.132292
MGAL_10NCA036654	682.993	130.81	0.951172	0.962389	2.3844	-0.547619	0.170982
MGAL_10NCA036655	682.993	130.81	0.951172	0.962389	2.3844	-0.547619	0.170982
MGAL_10B077704	131661	91052.4	1.18603	0.96238	0.53206	-0.547619	0.170982
MGAL_10B084996	150.746	10.3429	1.18591	0.962367	3.86541	-0.714286	0.0575893
MGAL_10B016514	16379.3	12150	1.18579	0.962352	0.430921	-0.714286	0.0575893
MGAL_10B092346	13552.4	9496.4	0.943405	0.962348	0.513099	-0.619048	0.11498
MGAL_10B034534	18792	11497.5	0.943203	0.962337	0.7088	-0.809524	0.0217758
MGAL_10B063050	11975.9	6644.72	0.95305	0.962308	0.849854	-0.380952	0.359871
MGAL_10B033216	47337.5	27328	1.18517	0.962281	0.792602	-0.404762	0.326835
MGAL_10B039860	11926.3	7372.56	0.954	0.962253	0.693912	-0.571429	0.151141
MGAL_10B088394	27886.5	20801.5	0.941662	0.962252	0.422881	-0.52381	0.196627
MGAL_10B031564	45442	31837.7	1.18481	0.962236	0.51329	-0.761905	0.036756
MGAL_10B076926	9133.32	6505.43	0.940889	0.962198	0.489494	-0.714286	0.0575893
MGAL_10B019695	68199.7	45360	0.940182	0.962148	0.588345	-0.547619	0.170982
MGAL_10B026504	13104.6	10082.3	0.939887	0.962122	0.378252	-0.666667	0.0830853
MGAL_10B051949	3484.37	1819.33	0.956047	0.962112	0.93749	-0.857143	0.0107143
MGAL_10NCA059034	529375	267757	0.939772	0.962111	0.983367	-0.452381	0.26746
MGAL_10B018928	3938.47	2118.71	0.95619	0.9621	0.894447	-0.738095	0.0458333
MGAL_10B040642	23519.8	16684.9	0.956448	0.96208	0.495328	-0.619048	0.11498
MGAL_10B065799	18493	14968.7	0.939369	0.962075	0.30503	-0.714286	0.0575893
MGAL_10B030738	17789.1	12405.3	0.939276	0.962066	0.520034	-0.595238	0.132292
MGAL_10B014279	32332.1	26544.8	0.939247	0.962064	0.284538	-0.714286	0.0575893
MGAL_10B019654	3403.7	1882.22	0.938655	0.96201	0.854667	-0.904762	0.00456349
MGAL_10B029569	8276.7	3943.77	1.38887	0.962009	1.06948	-0.619048	0.11498
MGAL_10B092189	86664.8	53264.1	1.18202	0.961863	0.702283	-0.52381	0.196627
MGAL_10B088968	38123.9	24424.5	0.95938	0.961813	0.642367	-0.547619	0.170982
MGAL_10B088269	8955.08	5318.24	0.960161	0.961732	0.751758	-0.47619	0.243056
MGAL_10B028162	26052.8	17777.8	0.960691	0.961677	0.551358	-0.428571	0.299206
MGAL_10B064159	8268.6	4219.33	0.961038	0.961637	0.970629	-0.642857	0.0961806
MGAL_10B079156	53802.5	42319	0.961122	0.961628	0.346368	-0.52381	0.196627
MGAL_10B033360	26389.3	17867.6	0.961234	0.961615	0.562608	-0.595238	0.132292
MGAL_10B081829	123.454	16.3198	0.935075	0.961607	2.91928	-0.380952	0.359871
MGAL_10B045685	6293.48	3531.89	0.961381	0.961598	0.833416	-0.880952	0.00724206
MGAL_10B010372	8757.38	6001.78	0.934777	0.961569	0.545109	-0.690476	0.0693948
MGAL_10B008872	3589.97	1703.68	0.961701	0.961561	1.07532	-0.261905	0.536409
MGAL_10B004483	18636.6	14212.9	0.934676	0.961557	0.390937	-0.547619	0.170982
MGAL_10B033415	36833.3	25608.1	1.18003	0.961549	0.52441	-0.642857	0.0961806
MGAL_10B058302	2329.58	1144.34	0.934494	0.961533	1.02555	-0.880952	0.00724206
MGAL_10B034494	12166	8155.23	0.962087	0.961517	0.577055	-0.52381	0.196627
MGAL_10B092303	31617.1	24464.4	0.934276	0.961502	0.370019	-0.428571	0.299206
MGAL_10B075923	16014.2	12703.2	0.963221	0.96138	0.334153	-0.642857	0.0961806
MGAL_10B065022	7896.1	4926.9	0.963714	0.961319	0.68046	-0.809524	0.0217758
MGAL_10B089577	7118.62	3461.15	0.931997	0.96117	1.04035	-0.547619	0.170982
MGAL_10B089675	17391.4	12483.8	0.931704	0.961124	0.478311	-0.571429	0.151141
MGAL_10B014262	16473.8	12035.8	0.965243	0.961122	0.452841	-0.5	0.216171
MGAL_10NCA018769	912.624	236.346	0.965727	0.961057	1.94912	-0.785714	0.0279266
MGAL_10B015505	6196.96	3820.02	0.929071	0.960691	0.697979	-0.5	0.216171
MGAL_10B009615	4864.08	2466.16	1.38654	0.960649	0.979902	-0.666667	0.0830853
MGAL_10B007178	8600.53	6332.09	0.969023	0.960593	0.441745	-0.761905	0.036756
MGAL_10B075242	12245.5	7569.33	0.969311	0.96055	0.694009	-0.52381	0.196627
MGAL_10B060732	13734.6	10550.1	0.927789	0.960462	0.380563	-0.47619	0.243056
MGAL_10B037798	2484.55	844.444	0.970372	0.960392	1.55691	-0.5	0.216171
MGAL_10B062845	11385.8	7222.57	0.927358	0.960384	0.656658	-0.547619	0.170982
MGAL_10B025959	44470.1	30457	1.17425	0.960348	0.546059	-0.595238	0.132292
MGAL_10B002664	6465.05	3417.94	0.926053	0.96014	0.919536	-0.571429	0.151141
MGAL_10B075009	33942.3	20305.4	1.3852	0.959762	0.741223	-0.619048	0.11498
MGAL_10B063052	10982.8	6941.52	0.974919	0.959667	0.66192	-0.761905	0.036756
MGAL_10NCA071973	697.217	179.695	0.922671	0.959476	1.95605	-0.666667	0.0830853
MGAL_10B009593	17191.8	10346.1	1.3846	0.959314	0.732639	-0.738095	0.0458333
MGAL_10B035274	23269.9	18178.3	0.921871	0.959314	0.356249	-0.52381	0.196627
MGAL_10B013264	4489.6	2082.32	0.921738	0.959287	1.1084	-0.547619	0.170982
MGAL_10B026395	4879.57	2914.53	0.977695	0.959187	0.743488	-0.857143	0.0107143
MGAL_10B011125	11085.2	6743.31	0.921102	0.959156	0.717105	-0.5	0.216171
MGAL_10B071623	15210.2	10673.8	0.978024	0.959127	0.510967	-0.785714	0.0279266
MGAL_10B047005	23050.7	16588.7	0.978163	0.959102	0.474613	-0.666667	0.0830853
MGAL_10B017921	31547.8	22755.1	0.920241	0.958977	0.47135	-0.619048	0.11498
MGAL_10NCA059033	598691	313435	0.92006	0.958939	0.933648	-0.452381	0.26746
MGAL_10B093120	5026.19	2699.63	0.979523	0.958852	0.896706	-0.619048	0.11498
MGAL_10B070481	5090.22	3173.65	0.980338	0.958695	0.681582	-0.690476	0.0693948
MGAL_10B067015	12343.2	7860.16	0.918454	0.958601	0.65109	-0.571429	0.151141
MGAL_10NCA061360	605.693	139.641	0.918227	0.958554	2.11686	-0.880952	0.00724206
MGAL_10B017427	31691.7	21606.6	0.918074	0.958521	0.552632	-0.47619	0.243056
MGAL_10B063281	8061.91	5301.98	0.981686	0.958431	0.604589	-0.714286	0.0575893
MGAL_10B025076	4214.86	1989.56	0.917595	0.95842	1.08304	-0.738095	0.0458333
MGAL_10B047925	11499.8	7883.57	0.917554	0.958411	0.544692	-0.452381	0.26746
MGAL_10B003603	1340.58	476.219	0.982582	0.958248	1.49316	-0.833333	0.015377
MGAL_10B032572	22045.3	16087.4	0.983157	0.95813	0.454546	-0.547619	0.170982
MGAL_10B024551	4753.49	2868.9	0.916162	0.958114	0.728491	-0.857143	0.0107143
MGAL_10B024361	3849.53	1933.33	0.916096	0.9581	0.993596	-0.857143	0.0107143
MGAL_10B019629	4587.24	2669.71	0.983472	0.958061	0.780944	-0.738095	0.0458333
MGAL_10B007608	34990.8	30606.6	0.983491	0.958057	0.19313	-0.714286	0.0575893
MGAL_10NCA067620	263.457	59.104	0.984206	0.957901	2.15624	-0.809524	0.0217758
MGAL_10B005395	1396.95	337.525	0.914932	0.95785	2.04922	-0.738095	0.0458333
MGAL_10NCA048250	519.283	72.2301	0.984616	0.957811	2.84585	-0.666667	0.0830853
MGAL_10B052806	943.626	354.317	0.914126	0.957676	1.41317	-0.809524	0.0217758
MGAL_10B045158	71270.9	48498.9	0.913997	0.957649	0.555361	-0.380952	0.359871
MGAL_10B080306	209.759	39.9316	0.913843	0.957615	2.39313	-0.380952	0.359871
MGAL_10B077278	18111.1	14819.3	0.912938	0.95742	0.289396	-0.809524	0.0217758
MGAL_10B055816	21616.4	13825.7	1.16415	0.957206	0.644774	-0.904762	0.00456349
MGAL_10B002493	25452.2	18176.6	0.987311	0.957178	0.485704	-0.571429	0.151141
MGAL_10B093541	13654.4	8930.79	0.911642	0.957139	0.612505	-0.52381	0.196627
MGAL_10B032767	2460.26	1027.07	0.987502	0.95713	1.26028	-0.547619	0.170982
MGAL_10B037663	531.455	37.264	1.41017	0.957058	3.83409	-0.619048	0.11498
MGAL_10B092537	43443.1	31429.7	0.911101	0.957022	0.466995	-0.428571	0.299206
MGAL_10B017673	2453.03	921.069	0.910959	0.956991	1.41318	-0.642857	0.0961806
MGAL_10NCA030167	140.604	16.9774	0.989002	0.956745	3.04995	-0.5	0.216171
MGAL_10B000873	13839.1	8781.7	1.16268	0.956669	0.656175	-0.47619	0.243056
MGAL_10B086289	9068.74	6036.1	0.909265	0.956622	0.587285	-0.666667	0.0830853
MGAL_10B016856	63613.2	56362	0.990064	0.956454	0.174605	-0.690476	0.0693948
MGAL_10B027978	7126.69	4357.63	0.990092	0.956446	0.709687	-0.785714	0.0279266
MGAL_10B067859	35135	25956.7	1.16203	0.956421	0.436803	-0.571429	0.151141
MGAL_10B009719	2144.55	871.245	0.990296	0.95639	1.29952	-0.97619	0.000396825
MGAL_10B076086	3533.59	1948.54	0.907288	0.95619	0.858744	-0.809524	0.0217758
MGAL_10B082698	6977.2	4020.8	0.907107	0.956151	0.795165	-0.642857	0.0961806
MGAL_10B074138	21760.1	17169.4	0.906254	0.955964	0.341847	-0.571429	0.151141
MGAL_10B083572	6978.47	4634.93	0.905884	0.955882	0.590362	-0.380952	0.359871
MGAL_10NCA010048	561.496	15.0047	1.88407	0.955827	5.22579	-0.619048	0.11498
MGAL_10B090542	25424.2	18131.1	1.16033	0.955779	0.487733	-0.547619	0.170982
MGAL_10B074662	674.587	122.621	0.992428	0.955764	2.4598	-0.738095	0.0458333
MGAL_10B017153	2529.66	1072.22	0.992728	0.95567	1.23835	-0.761905	0.036756
MGAL_10B022051	7233.04	4747.82	0.992746	0.955665	0.607336	-0.666667	0.0830853
MGAL_10B008954	7742.85	4772.7	1.15895	0.955253	0.698059	-0.761905	0.036756
MGAL_10B058711	10584.2	5883.82	0.994136	0.955215	0.847084	-0.309524	0.461806
MGAL_10B084792	10194.7	6684.86	0.902606	0.955156	0.608854	-0.452381	0.26746
MGAL_10B031964	143.701	10.5715	0.994655	0.95504	3.76481	-0.452381	0.26746
MGAL_10B062091	14017.9	10913.1	0.995073	0.954895	0.361207	-0.857143	0.0107143
MGAL_10B023081	7973.58	4831.8	0.995103	0.954884	0.722666	-0.809524	0.0217758
MGAL_10NCA066482	121.133	11.744	0.995259	0.95483	3.3666	-0.333333	0.427877
MGAL_10B069018	3138.33	1542.57	0.899964	0.954557	1.02466	-0.833333	0.015377
MGAL_10B057524	22009.9	17672.6	0.899876	0.954536	0.316638	-0.619048	0.11498
MGAL_10B066694	80808.2	51536.3	1.72044	0.954487	0.648913	-0.880952	0.00724206
MGAL_10NCA026562	5484.58	2603.78	1.15694	0.954479	1.07478	-0.714286	0.0575893
MGAL_10NCA039226	162.838	13.9013	0.996313	0.954458	3.55015	-0.690476	0.0693948
MGAL_10B093500	6920.43	4340.65	0.899112	0.954362	0.67295	-0.547619	0.170982
MGAL_10B053729	7361.35	3592.98	0.996661	0.954327	1.03479	-0.880952	0.00724206
MGAL_10B092245B	5915.16	3829.58	0.898696	0.954265	0.627231	-0.97619	0.000396825
MGAL_10B087466	20345.9	14832.1	0.898443	0.954206	0.456015	-0.404762	0.326835
MGAL_10B075319	5593.63	2661.61	1.156	0.954118	1.07149	-0.714286	0.0575893
MGAL_10B017455	394.689	72.0774	0.9975	0.95401	2.4531	-0.547619	0.170982
MGAL_10NCA025764	35625.9	25713.1	0.897222	0.953922	0.470419	-0.690476	0.0693948
MGAL_10B017045	33164.6	27162.3	0.897111	0.953896	0.288035	-0.547619	0.170982
MGAL_10B001985	52098.9	35393.9	1.71995	0.953857	0.557751	-0.809524	0.0217758
MGAL_10B051901	1617.81	301.775	0.896864	0.953837	2.4225	-0.238095	0.582143
MGAL_10B093480	63624.3	42624.3	1.15526	0.953835	0.577903	-0.52381	0.196627
MGAL_10B015944	20649.8	16701	0.89661	0.953776	0.306194	-0.761905	0.036756
MGAL_10B008249	1492.88	641.489	0.896579	0.953769	1.2186	-0.690476	0.0693948
MGAL_10B040276	18037.1	13637.5	0.895747	0.953571	0.403392	-0.52381	0.196627
MGAL_10B034073	15921	10944.9	0.89555	0.953524	0.540674	-0.52381	0.196627
MGAL_10B028142	8120.73	5688.13	0.894698	0.953318	0.513654	-0.738095	0.0458333
MGAL_10B029975	3145.23	1575.81	0.894567	0.953286	0.997071	-0.761905	0.036756
MGAL_10B061631	331.522	34.2301	1.41335	0.95324	3.27577	-0.97619	0.000396825
MGAL_10B090584	18414.4	13298	0.999517	0.953205	0.46963	-0.547619	0.170982
MGAL_10B034768	33650.4	25952.8	1.15314	0.953032	0.374735	-0.690476	0.0693948
MGAL_10B086416	137.808	28.3882	1.00003	0.952992	2.2793	-0.833333	0.015377
MGAL_10NCA039225	178.436	14.8928	1.00008	0.952972	3.58272	-0.690476	0.0693948
MGAL_10B046007	22372.5	14832.6	1.00015	0.952942	0.592955	-0.333333	0.427877
MGAL_10B064059	10037	5603.7	0.892733	0.952835	0.840881	-0.642857	0.0961806
MGAL_10B092172	41409.6	28511.3	1.00076	0.952678	0.538432	-0.857143	0.0107143
MGAL_10B092854	13867.4	8141.6	1.15164	0.952474	0.768315	-0.595238	0.132292
MGAL_10B007032	4219.84	1784.12	1.15162	0.952466	1.24198	-0.52381	0.196627
MGAL_10B049191	7224.5	2468.43	1.15157	0.952449	1.54931	-0.785714	0.0279266
MGAL_10NCA049412	11554.6	7703.2	0.890798	0.952347	0.584944	-0.547619	0.170982
MGAL_10B016039	66928.6	50140.2	1.15126	0.952335	0.416657	-0.547619	0.170982
MGAL_10NCA030066	885.937	92.4575	1.00209	0.952086	3.26034	-0.380952	0.359871
MGAL_10B011620	4695.83	2387.91	0.889125	0.951916	0.975634	-0.809524	0.0217758
MGAL_10B022102	7634.77	4491.12	0.888589	0.951775	0.765508	-0.714286	0.0575893
MGAL_10B056022	13940.8	9660.37	0.888311	0.951702	0.529163	-0.214286	0.619097
MGAL_10B056263	513.208	156.137	0.888057	0.951636	1.71673	-0.690476	0.0693948
MGAL_10B082784	8127.92	5874.5	0.887494	0.951487	0.468421	-0.952381	0.00114087
MGAL_10B049696	11715.1	5035.28	1.14866	0.951409	1.21823	-0.52381	0.196627
MGAL_10B017030	62579.4	48721.9	1.00369	0.951339	0.361117	-0.690476	0.0693948
MGAL_10B006756	6029.63	3556.03	0.886858	0.951315	0.761802	-0.809524	0.0217758
MGAL_10NCA056358	1694.72	681.709	0.886207	0.951141	1.31382	-0.714286	0.0575893
MGAL_10B003073	14347.3	10764.3	0.886059	0.951101	0.414517	-0.547619	0.170982
MGAL_10B016981	5485.29	2763.01	1.00444	0.950971	0.989326	-0.738095	0.0458333
MGAL_10NCA048344	6109.01	2057.42	1.00455	0.950915	1.5701	-0.571429	0.151141
MGAL_10NCA048345	6109.01	2057.42	1.00455	0.950915	1.5701	-0.571429	0.151141
MGAL_10NCA048346	6109.01	2057.42	1.00455	0.950915	1.5701	-0.571429	0.151141
MGAL_10NCA048347	6109.01	2057.42	1.00455	0.950915	1.5701	-0.571429	0.151141
MGAL_10B049469	25469.1	18614.1	0.885153	0.950853	0.452353	-0.785714	0.0279266
MGAL_10NCA000617	1031.78	250.423	0.884563	0.950691	2.0427	-0.0238095	0.976786
MGAL_10B080523	12668.7	9854.73	0.884386	0.950643	0.362385	-0.785714	0.0279266
MGAL_10B052748	337.276	73.6568	0.884385	0.950643	2.19504	-0.666667	0.0830853
MGAL_10B093391	71691.3	54568.5	1.14581	0.950449	0.39373	-0.452381	0.26746
MGAL_10B042047	7646.95	5032.86	1.00578	0.950303	0.603506	-0.714286	0.0575893
MGAL_10B026917	21390.7	16563.4	0.882872	0.950221	0.368992	-0.52381	0.196627

## Sheet: Suppl. Table 6
Supplementary Table 6: Enriched GO terms in genes showing differential expression (DE) between female- and male-biased samples. For each enriched GO term is reported the number of annotated genes in the background, the number of annotated genes in DE, the number of expeced annotated genes in the DE, the Fisher p-value of the enrichment, and the GO category. BP= Biological process, CC=cellular com…
GO.ID	Term	Annotated	Significant	Expected	classicFisher	GO category
GO:0007018	microtubule-based movement	191	23	2.78	7.5e-15	BP
GO:0006368	transcription elongation by RNA polymera...	24	4	0.35	0.00014	BP
GO:0009987	cellular process	8140	118	118.35	0.00015	BP
GO:0003341	cilium movement	53	5	0.77	0.00032	BP
GO:0008150	biological_process	9336	127	135.74	0.0005	BP
GO:0007097	nuclear migration	16	3	0.23	0.00071	BP
GO:0070286	axonemal dynein complex assembly	21	3	0.31	0.00163	BP
GO:0060271	cilium assembly	145	9	2.11	0.00253	BP
GO:0009887	animal organ morphogenesis	28	3	0.41	0.00378	BP
GO:0006898	receptor-mediated endocytosis	29	3	0.42	0.00418	BP
GO:0051276	chromosome organization	188	7	2.73	0.0055	BP
GO:0009888	tissue development	35	3	0.51	0.00713	BP
GO:0060285	cilium-dependent cell motility	35	3	0.51	0.00713	BP
GO:0051016	barbed-end actin filament capping	13	2	0.19	0.00915	BP
GO:0051231	spindle elongation	13	2	0.19	0.00915	BP
GO:0034502	protein localization to chromosome	13	2	0.19	0.00915	BP
GO:0007049	cell cycle	447	13	6.5	0.00918	BP
GO:0022402	cell cycle process	336	11	4.89	0.01014	BP
GO:2000812	regulation of barbed-end actin filament ...	1	1	0.01	0.01133	BP
GO:1903286	regulation of potassium ion import	1	1	0.01	0.01133	BP
GO:1903288	positive regulation of potassium ion imp...	1	1	0.01	0.01133	BP
GO:0032776	DNA methylation on cytosine	1	1	0.01	0.01133	BP
GO:0018197	peptidyl-aspartic acid modification	1	1	0.01	0.01133	BP
GO:0034087	establishment of mitotic sister chromati...	1	1	0.01	0.01133	BP
GO:0032954	regulation of cytokinetic process	1	1	0.01	0.01133	BP
GO:2000431	regulation of cytokinesis, actomyosin co...	1	1	0.01	0.01133	BP
GO:0010424	DNA methylation on cytosine within a CG ...	1	1	0.01	0.01133	BP
GO:0061780	mitotic cohesin loading	1	1	0.01	0.01133	BP
GO:0090116	C-5 methylation of cytosine	1	1	0.01	0.01133	BP
GO:0042264	peptidyl-aspartic acid hydroxylation	1	1	0.01	0.01133	BP
GO:0090307	mitotic spindle assembly	16	2	0.23	0.01377	BP
GO:0007010	cytoskeleton organization	409	16	5.95	0.01598	BP
GO:0007062	sister chromatid cohesion	19	2	0.28	0.0192	BP
GO:1903047	mitotic cell cycle process	189	6	2.75	0.02045	BP
GO:0015846	polyamine transport	2	1	0.03	0.02253	BP
GO:1902047	polyamine transmembrane transport	2	1	0.03	0.02253	BP
GO:0009097	isoleucine biosynthetic process	2	1	0.03	0.02253	BP
GO:0060287	epithelial cilium movement involved in d...	2	1	0.03	0.02253	BP
GO:0071921	cohesin loading	2	1	0.03	0.02253	BP
GO:0051660	establishment of centrosome localization	2	1	0.03	0.02253	BP
GO:0006549	isoleucine metabolic process	2	1	0.03	0.02253	BP
GO:0010968	regulation of microtubule nucleation	2	1	0.03	0.02253	BP
GO:0090063	positive regulation of microtubule nucle...	2	1	0.03	0.02253	BP
GO:0000819	sister chromatid segregation	54	3	0.79	0.02315	BP
GO:0000278	mitotic cell cycle	251	7	3.65	0.02397	BP
GO:0070925	organelle assembly	302	14	4.39	0.02624	BP
GO:0006468	protein phosphorylation	376	9	5.47	0.02697	BP
GO:0030036	actin cytoskeleton organization	166	7	2.41	0.0283	BP
GO:0030029	actin filament-based process	167	7	2.43	0.029	BP
GO:0140673	transcription elongation-coupled chromat...	3	1	0.04	0.0336	BP
GO:0071169	establishment of protein localization to...	3	1	0.04	0.0336	BP
GO:0034085	establishment of sister chromatid cohesi...	3	1	0.04	0.0336	BP
GO:0150105	protein localization to cell-cell juncti...	3	1	0.04	0.0336	BP
GO:1904158	axonemal central apparatus assembly	3	1	0.04	0.0336	BP
GO:0006566	threonine metabolic process	3	1	0.04	0.0336	BP
GO:0006567	threonine catabolic process	3	1	0.04	0.0336	BP
GO:0031112	positive regulation of microtubule polym...	3	1	0.04	0.0336	BP
GO:0031113	regulation of microtubule polymerization	3	1	0.04	0.0336	BP
GO:0031116	positive regulation of microtubule polym...	3	1	0.04	0.0336	BP
GO:0110020	regulation of actomyosin structure organ...	3	1	0.04	0.0336	BP
GO:0042063	gliogenesis	3	1	0.04	0.0336	BP
GO:0014013	regulation of gliogenesis	3	1	0.04	0.0336	BP
GO:0070199	establishment of protein localization to...	3	1	0.04	0.0336	BP
GO:0006099	tricarboxylic acid cycle	27	2	0.39	0.03716	BP
GO:0016310	phosphorylation	403	9	5.86	0.03941	BP
GO:0051050	positive regulation of transport	29	2	0.42	0.04236	BP
GO:0009855	determination of bilateral symmetry	4	1	0.06	0.04455	BP
GO:0009082	branched-chain amino acid biosynthetic p...	4	1	0.06	0.04455	BP
GO:0007368	determination of left/right symmetry	4	1	0.06	0.04455	BP
GO:0006858	extracellular transport	4	1	0.06	0.04455	BP
GO:0006265	DNA topological change	4	1	0.06	0.04455	BP
GO:0003351	epithelial cilium movement involved in e...	4	1	0.06	0.04455	BP
GO:0010766	negative regulation of sodium ion transp...	4	1	0.06	0.04455	BP
GO:0006565	L-serine catabolic process	4	1	0.06	0.04455	BP
GO:0009799	specification of symmetry	4	1	0.06	0.04455	BP
GO:0060972	left/right pattern formation	4	1	0.06	0.04455	BP
GO:0034446	substrate adhesion-dependent cell spread...	4	1	0.06	0.04455	BP
GO:1903358	regulation of Golgi organization	4	1	0.06	0.04455	BP
GO:0044087	regulation of cellular component biogene...	84	5	1.22	0.04485	BP
GO:0140694	non-membrane-bounded organelle assembly	119	4	1.73	0.04611	BP
GO:0032880	regulation of protein localization	31	2	0.45	0.04781	BP
GO:0030286	dynein complex	79	16	1.05	1.9e-11	CC
GO:0005858	axonemal dynein complex	17	5	0.23	6.3e-07	CC
GO:0110165	cellular anatomical entity	8420	109	111.99	1.4e-05	CC
GO:0071439	clathrin complex	2	2	0.03	0.00011	CC
GO:0008023	transcription elongation factor complex	31	4	0.41	0.00028	CC
GO:0005813	centrosome	124	7	1.65	0.00031	CC
GO:0005640	nuclear outer membrane	5	2	0.07	0.00106	CC
GO:0034993	meiotic nuclear membrane microtubule tet...	6	2	0.08	0.00157	CC
GO:0030132	clathrin coat of coated pit	6	2	0.08	0.00157	CC
GO:0030130	clathrin coat of trans-Golgi network ves...	8	2	0.11	0.0029	CC
GO:0030864	cortical actin cytoskeleton	30	3	0.4	0.00365	CC
GO:0043232	intracellular non-membrane-bounded organ...	1312	46	17.45	0.00542	CC
GO:0043229	intracellular organelle	4811	84	63.99	0.00609	CC
GO:0043186	P granule	12	2	0.16	0.00664	CC
GO:0005930	axoneme	59	8	0.78	0.00833	CC
GO:0034451	centriolar satellite	15	2	0.2	0.01036	CC
GO:0090694	Scc2-Scc4 cohesin loading complex	1	1	0.01	0.01043	CC
GO:0016589	NURF complex	1	1	0.01	0.01043	CC
GO:0008091	spectrin	1	1	0.01	0.01043	CC
GO:0005634	nucleus	2397	39	31.88	0.01777	CC
GO:0030054	cell junction	260	7	3.46	0.0189	CC
GO:0070449	elongin complex	2	1	0.03	0.02075	CC
GO:0070775	H3 histone acetyltransferase complex	2	1	0.03	0.02075	CC
GO:0070776	MOZ/MORF histone acetyltransferase compl...	2	1	0.03	0.02075	CC
GO:0070390	transcription export complex 2	2	1	0.03	0.02075	CC
GO:0036157	outer dynein arm	3	1	0.04	0.03097	CC
GO:0070765	gamma-secretase complex	3	1	0.04	0.03097	CC
GO:0032116	SMC loading complex	3	1	0.04	0.03097	CC
GO:0036396	RNA N6-methyladenosine methyltransferase...	3	1	0.04	0.03097	CC
GO:0035101	FACT complex	3	1	0.04	0.03097	CC
GO:0005971	ribonucleoside-diphosphate reductase com...	3	1	0.04	0.03097	CC
GO:0045293	mRNA editing complex	3	1	0.04	0.03097	CC
GO:0005672	transcription factor TFIIA complex	3	1	0.04	0.03097	CC
GO:0005911	cell-cell junction	66	3	0.88	0.03143	CC
GO:0045252	oxoglutarate dehydrogenase complex	4	1	0.05	0.04108	CC
GO:0005604	basement membrane	4	1	0.05	0.04108	CC
GO:0045177	apical part of cell	32	2	0.43	0.04364	CC
GO:0005694	chromosome	378	8	5.03	0.04371	CC
GO:0070161	anchoring junction	79	3	1.05	0.04934	CC
GO:0005524	ATP binding	865	43	10.12	1.8e-20	MF
GO:0008569	minus-end-directed microtubule motor act...	52	14	0.61	2.7e-17	MF
GO:0016887	ATP hydrolysis activity	241	22	2.82	6.4e-16	MF
GO:0051959	dynein light intermediate chain binding	52	13	0.61	1.1e-15	MF
GO:0045505	dynein intermediate chain binding	64	13	0.75	2.1e-14	MF
GO:0005488	binding	8191	120	95.78	4.1e-07	MF
GO:0051015	actin filament binding	106	8	1.24	6.8e-06	MF
GO:0032051	clathrin light chain binding	3	2	0.04	0.00026	MF
GO:0003777	microtubule motor activity	92	18	1.08	0.00035	MF
GO:0003682	chromatin binding	145	6	1.7	0.00246	MF
GO:0140658	ATP-dependent chromatin remodeler activi...	29	3	0.34	0.00248	MF
GO:0004672	protein kinase activity 333	333	9	3.89	0.0042	MF
GO:0003729	mRNA binding	134	5	1.57	0.00864	MF
GO:0008017	microtubule binding	136	5	1.59	0.00918	MF
GO:0019870	potassium channel inhibitor activity	1	1	0.01	0.0094	MF
GO:0005540	hyaluronic acid binding	1	1	0.01	0.0094	MF
GO:0003886	DNA (cytosine-5-)-methyltransferase acti...	1	1	0.01	0.0094	MF
GO:0004450	isocitrate dehydrogenase (NADP+) activit...	1	1	0.01	0.0094	MF
GO:0004794	L-threonine ammonia-lyase activity	1	1	0.01	0.0094	MF
GO:0062101	peptidyl-aspartic acid 3-dioxygenase act...	1	1	0.01	0.0094	MF
GO:0035091	phosphatidylinositol binding	90	4	1.05	0.01022	MF
GO:0005543	phospholipid binding	140	5	1.64	0.01032	MF
GO:0003674	molecular_function	11756	131	137.47	0.01281	MF
GO:0008574	plus-end-directed microtubule motor acti...	2	1	0.02	0.01871	MF
GO:0003918	DNA topoisomerase type II (double strand...	2	1	0.02	0.01871	MF
GO:0003941	L-serine ammonia-lyase activity	2	1	0.02	0.01871	MF
GO:0001147	transcription termination site sequence-...	2	1	0.02	0.01871	MF
GO:0015203	polyamine transmembrane transporter acti...	2	1	0.02	0.01871	MF
GO:0003994	aconitate hydratase activity	2	1	0.02	0.01871	MF
GO:0005515	protein binding	3812	64	44.58	0.02319	MF
GO:0031491	nucleosome binding	26	2	0.3	0.02459	MF
GO:0004674	protein serine/threonine kinase activity	178	5	2.08	0.02635	MF
GO:0005220	inositol 1,4,5-trisphosphate-sensitive c...	3	1	0.04	0.02793	MF
GO:0010314	phosphatidylinositol-5-phosphate binding	3	1	0.04	0.02793	MF
GO:0005545	1-phosphatidylinositol binding	3	1	0.04	0.02793	MF
GO:0008097	5S rRNA binding	3	1	0.04	0.02793	MF
GO:0034584	piRNA binding	3	1	0.04	0.02793	MF
GO:0016836	hydro-lyase activity	33	2	0.39	0.03828	MF
GO:0016835	carbon-oxygen lyase activity	34	2	0.4	0.04043	MF
GO:0008289	lipid binding	203	5	2.37	0.04266	MF
GO:0042393	histone binding	85	3	0.99	0.04591	MF
GO:0015278	calcium-release channel activity	5	1	0.06	0.04612	MF
GO:0061731	ribonucleoside-diphosphate reductase act...	5	1	0.06	0.04612	MF
GO:0003916	DNA topoisomerase activity	5	1	0.06	0.04612	MF
GO:0004748	ribonucleoside-diphosphate reductase act...	5	1	0.06	0.04612	MF
GO:0004709	MAP kinase kinase kinase activity	5	1	0.06	0.04612	MF
GO:0010997	anaphase-promoting complex binding	5	1	0.06	0.04612	MF
GO:0004386	helicase activity	145	4	1.7	0.04786	MF

## Sheet: Suppl. Table 7
Supplementary Table 7: Genomic annotation of DE protein coding genes (PCGs) between female- and male-biased samples. The four PCGs showing an upregulation in male-biased samples are highlighted
Feature name	Trancript name	Annotation
MGAL_10B000873	unassigned_transcript_75745	Hypothetical predicted protein
MGAL_10B001309	unassigned_transcript_163499	far upstream element-binding protein
MGAL_10B001985	unassigned_transcript_110692	hydrocephalus-inducing protein
MGAL_10B002493	unassigned_transcript_140777	dynein heavy chain, axonemal
MGAL_10B002664	unassigned_transcript_53894	gelsolin
MGAL_10B002920	unassigned_transcript_16962	dynein heavy chain, axonemal
MGAL_10B003073	unassigned_transcript_207288	dynein intermediate chain 2, axonemal
MGAL_10B003489	unassigned_transcript_126609	Hypothetical predicted protein
MGAL_10B003603	unassigned_transcript_65569	tudor domain-containing protein 2
MGAL_10B004323	unassigned_transcript_6821	Ras-related protein Ral-A
MGAL_10B004483	unassigned_transcript_213861	isocitrate dehydrogenase
MGAL_10B004609	unassigned_transcript_70391	dynein regulatry complex protein 1
MGAL_10B004966	unassigned_transcript_17011	manganese-dependent ADP-ribose/CDP-alcohol diphosphatase
MGAL_10B005395	unassigned_transcript_80657	Hypothetical predicted protein
MGAL_10B006756	unassigned_transcript_96400	Hypothetical predicted protein
MGAL_10B007032	unassigned_transcript_2516	E3 ubiquitin-protein ligase TTC3
MGAL_10B007178	unassigned_transcript_98320	Hypothetical predicted protein
MGAL_10B007608	unassigned_transcript_107466	bromodomain and PHD finger-containing protein 1
MGAL_10B007988	unassigned_transcript_174315	kinesin family member 23
MGAL_10B008249	unassigned_transcript_138471	Hypothetical predicted protein
MGAL_10B008872	unassigned_transcript_190877	cation-transporting ATPase 13A3/4/5
MGAL_10B008954	unassigned_transcript_34468	aconitate hydratase
MGAL_10B009593	unassigned_transcript_5503	Hypothetical predicted protein
MGAL_10B009615	unassigned_transcript_184982	coronin-2
MGAL_10B009719	unassigned_transcript_80312	Hypothetical predicted protein NIMA (never in mitosis gene a)-related kinase
MGAL_10B010372	unassigned_transcript_46379	Hypothetical predicted protein
MGAL_10B010742	unassigned_transcript_124438	Hypothetical predicted protein
MGAL_10B011125	unassigned_transcript_108910	Hypothetical predicted protein nesprin-1
MGAL_10B011620	unassigned_transcript_132264	PHD and RING finger domain-containing protein 1
MGAL_10B011781	unassigned_transcript_139450	Hypothetical predicted protein
MGAL_10B013264	unassigned_transcript_85832	Hypothetical predicted protein
MGAL_10B014262	unassigned_transcript_72206	Hypothetical predicted protein
MGAL_10B014279	unassigned_transcript_143286	RAD54-like protein 2
MGAL_10B014964	unassigned_transcript_156582	Hypothetical predicted protein
MGAL_10B015505	unassigned_transcript_136087	Ras and EF-hand domain-containing protein
MGAL_10B015944	unassigned_transcript_56487	heterogeneous nuclear ribonucleoprotein A1/A3
MGAL_10B016039	unassigned_transcript_133522	dynein heavy chain, axonemal
MGAL_10B016228	unassigned_transcript_137669	ribonucleoside-diphosphate reductase subunit M1
MGAL_10B016514	unassigned_transcript_169563	large subunit ribosomal protein L5e
MGAL_10B016856	unassigned_transcript_179200	tousled-like kinase
MGAL_10B016981	unassigned_transcript_36621	Hypothetical predicted protein
MGAL_10B017030	unassigned_transcript_28095	Hypothetical predicted protein
MGAL_10B017045	unassigned_transcript_91548	Hypothetical predicted protein
MGAL_10B017153	unassigned_transcript_50464	ATP-dependent RNA helicase DHX8/PRP22
MGAL_10B017310	unassigned_transcript_152055	Hypothetical predicted protein
MGAL_10B017427	unassigned_transcript_34446	probable ATP-dependent RNA helicase DDX4
MGAL_10B017455	unassigned_transcript_51961	Hypothetical predicted protein
MGAL_10B017673	unassigned_transcript_61639	nesprin-1
MGAL_10B017921	unassigned_transcript_129383	dynein heavy chain, axonemal Hypothetical predicted protein
MGAL_10B018928	unassigned_transcript_128541	spectrin beta
MGAL_10B019106	unassigned_transcript_67233	centriolin Hypothetical predicted protein
MGAL_10B019629	unassigned_transcript_56696	puromycin-sensitive aminopeptidase
MGAL_10B019654	unassigned_transcript_21185	synovial sarcoma, X breakpoint 2 interacting protein
MGAL_10B019695	unassigned_transcript_141835	tudor domain-containing protein 1/4/6/7
MGAL_10B022051	unassigned_transcript_164956	TATA-binding protein-associated factor
MGAL_10B022102	unassigned_transcript_181406	afadin Hypothetical predicted protein
MGAL_10B023081	unassigned_transcript_164838	ubiquitin-conjugating enzyme E2 O
MGAL_10B024361	unassigned_transcript_57060	Rho guanine nucleotide exchange factor 4/29
MGAL_10B024551	unassigned_transcript_42748	Hypothetical predicted protein
MGAL_10B024921	unassigned_transcript_131411	Hypothetical predicted protein
MGAL_10B025076	unassigned_transcript_75050	Hypothetical predicted protein
MGAL_10B025840	unassigned_transcript_152247	Hypothetical predicted protein
MGAL_10B025959	unassigned_transcript_213500	hyaluronan-mediated motility receptor Hypothetical predicted protein
MGAL_10B026395	unassigned_transcript_176283	tight junction protein 1
MGAL_10B026504	unassigned_transcript_97567	WNK lysine deficient protein kinase
MGAL_10B026551	unassigned_transcript_137371	eukaryotic translation initiation factor 4E transporter
MGAL_10B026917	unassigned_transcript_184330	clathrin heavy chain
MGAL_10B027978	unassigned_transcript_39578	Hypothetical predicted protein
MGAL_10B028142	unassigned_transcript_151468	serine/threonine-protein kinase PRP4
MGAL_10B028162	unassigned_transcript_133535	structural maintenance of chromosome 1
MGAL_10B029243	unassigned_transcript_65242	Hypothetical predicted protein
MGAL_10B029569	unassigned_transcript_85569	mitogen-activated protein kinase kinase kinase 5
MGAL_10B029975	unassigned_transcript_72822	Hypothetical predicted protein tetraspanin-18
MGAL_10B030738	unassigned_transcript_79571	rootletin
MGAL_10B031564	unassigned_transcript_155762	Hypothetical predicted protein
MGAL_10B031964	unassigned_transcript_37692	Hypothetical predicted protein
MGAL_10B032572	unassigned_transcript_12028	E3 ubiquitin-protein ligase EDD1 Hypothetical predicted protein
MGAL_10B032767	unassigned_transcript_102831	Hypothetical predicted protein
MGAL_10B033216	unassigned_transcript_185294	dynein heavy chain, axonemal Hypothetical predicted protein
MGAL_10B033360	unassigned_transcript_403	dynein heavy chain, axonemal
MGAL_10B033415	unassigned_transcript_153054	Hypothetical predicted protein
MGAL_10B034073	unassigned_transcript_65378	structural maintenance of chromosome 2
MGAL_10B034494	unassigned_transcript_76234	dynein heavy chain, axonemal
MGAL_10B034534	unassigned_transcript_197584	Hypothetical predicted protein
MGAL_10B034729	unassigned_transcript_142061	chromodomain protein Y
MGAL_10B034768	unassigned_transcript_146094	E3 ubiquitin-protein ligase UHRF1
MGAL_10B035274	unassigned_transcript_150303	mitogen-activated protein kinase kinase kinase 1
MGAL_10B037200	unassigned_transcript_121936	Hypothetical predicted protein
MGAL_10B037663	unassigned_transcript_169039	Hypothetical predicted protein
MGAL_10B037798	unassigned_transcript_89260	Hypothetical predicted protein
MGAL_10B039860	unassigned_transcript_82669	DNA (cytosine-5)-methyltransferase 1
MGAL_10B040111	unassigned_transcript_178609	Hypothetical predicted protein
MGAL_10B040276	unassigned_transcript_138772	solute carrier family 6 (neurotransmitter transporter, amino acid) member 5/7/9/14
MGAL_10B040642	unassigned_transcript_123020	Hypothetical predicted protein
MGAL_10B040765	unassigned_transcript_160328	collagen, type V/XI/XXIV/XXVII, alpha
MGAL_10B042047	unassigned_transcript_50951	Hypothetical predicted protein phospholipid-translocating ATPase
MGAL_10B042510	unassigned_transcript_40874	Hypothetical predicted protein
MGAL_10B042856	unassigned_transcript_192117	Hypothetical predicted protein
MGAL_10B043706	unassigned_transcript_90775	Hypothetical predicted protein
MGAL_10B044223	unassigned_transcript_95873	intraflagellar transport protein 80
MGAL_10B045046	unassigned_transcript_173580	kinesin family member 5
MGAL_10B045158	unassigned_transcript_60655	spectrin alpha
MGAL_10B045365	unassigned_transcript_73450	Hypothetical predicted protein
MGAL_10B045685	unassigned_transcript_20822	Hypothetical predicted protein
MGAL_10B046007	unassigned_transcript_149039	DNA replication licensing factor MCM3
MGAL_10B047005	unassigned_transcript_3108	mitogen-activated protein kinase kinase kinase 19
MGAL_10B047318	unassigned_transcript_125616	A-kinase anchor protein 9
MGAL_10B047925	unassigned_transcript_176036	Ras GTPase-activating protein 1
MGAL_10B049191	unassigned_transcript_4511	echinoderm microtubule-associated protein-like 6
MGAL_10B049469	unassigned_transcript_135903	Hypothetical predicted protein
MGAL_10B049696	unassigned_transcript_31399	Hypothetical predicted protein
MGAL_10B051571	unassigned_transcript_33840	Hypothetical predicted protein
MGAL_10B051901	unassigned_transcript_194978	Hypothetical predicted protein
MGAL_10B051949	unassigned_transcript_148070	dynein heavy chain, axonemal
MGAL_10B052748	unassigned_transcript_201412	Hypothetical predicted protein
MGAL_10B052806	unassigned_transcript_5506	Hypothetical predicted protein
MGAL_10B052964	unassigned_transcript_96513	Hypothetical predicted protein
MGAL_10B053729	unassigned_transcript_63194	Hypothetical predicted protein
MGAL_10B054831	unassigned_transcript_200360	aubergine
MGAL_10B055288	unassigned_transcript_21706	Hypothetical predicted protein
MGAL_10B055816	unassigned_transcript_52917	ATP-binding cassette, subfamily F, member 2
MGAL_10B056022	unassigned_transcript_6717	ATP-binding cassette, subfamily A (ABC1), member 3
MGAL_10B056263	unassigned_transcript_70792	tight junction protein 4 (peripheral)
MGAL_10B056882	unassigned_transcript_206460	Hypothetical predicted protein
MGAL_10B057524	unassigned_transcript_180308	protein ECT2
MGAL_10B057936	unassigned_transcript_36247	Hypothetical predicted protein
MGAL_10B058302	unassigned_transcript_137477	merlin
MGAL_10B058711	unassigned_transcript_214395	Hypothetical predicted protein
MGAL_10B059751	unassigned_transcript_163380	dynein heavy chain, axonemal
MGAL_10B060732	unassigned_transcript_157902	Hypothetical predicted protein
MGAL_10B061520	unassigned_transcript_188019	Hypothetical predicted protein
MGAL_10B061631	unassigned_transcript_172279	presenilin enhancer 2
MGAL_10B061956	unassigned_transcript_108069	melanoma-associated antigen p97
MGAL_10B062091	unassigned_transcript_206515	coiled-coil domain-containing protein 41
MGAL_10B062845	unassigned_transcript_109368	myosin heavy chain
MGAL_10B062921	unassigned_transcript_125620	Hypothetical predicted protein
MGAL_10B063050	unassigned_transcript_76835	dynein heavy chain, axonemal
MGAL_10B063052	unassigned_transcript_196888	dynein heavy chain, axonemal
MGAL_10B063281	unassigned_transcript_100877	low-density lipoprotein receptor-related protein 1 (alpha-2-macroglobulin receptor)
MGAL_10B064059	unassigned_transcript_163555	RNA-binding protein 25
MGAL_10B064159	unassigned_transcript_198122	early endosome antigen 1
MGAL_10B065022	unassigned_transcript_30088	STE20-like kinase
MGAL_10B065799	unassigned_transcript_1440	adenylate kinase
MGAL_10B066694	unassigned_transcript_149258	DNA topoisomerase II
MGAL_10B067015	unassigned_transcript_152469	Hypothetical predicted protein
MGAL_10B067859	unassigned_transcript_37952	Hypothetical predicted protein
MGAL_10B068290	unassigned_transcript_53395	laminin, beta 1
MGAL_10B069018	unassigned_transcript_29	aspartate beta-hydroxylase Hypothetical predicted protein
MGAL_10B070111	unassigned_transcript_5508	Hypothetical predicted protein
MGAL_10B070481	unassigned_transcript_1098	Hypothetical predicted protein
MGAL_10B071623	unassigned_transcript_152089	Hypothetical predicted protein
MGAL_10B072029	unassigned_transcript_91934	kinesin family member 11
MGAL_10B072936	unassigned_transcript_25690	transcription elongation factor SPT6
MGAL_10B073840	unassigned_transcript_123373	nucleosome-remodeling factor subunit BPTF
MGAL_10B074138	unassigned_transcript_110721	Hypothetical predicted protein
MGAL_10B074662	unassigned_transcript_14428	mitotic-spindle organizing protein 2A/2B
MGAL_10B075009	unassigned_transcript_203591	E3 ubiquitin-protein ligase HERC2
MGAL_10B075242	unassigned_transcript_135907	Hypothetical predicted protein
MGAL_10B075319	unassigned_transcript_190816	Hypothetical predicted protein
MGAL_10B075923	unassigned_transcript_77608	nidogen (entactin)
MGAL_10B076086	unassigned_transcript_28034	Hypothetical predicted protein
MGAL_10B076686	unassigned_transcript_31913	Hypothetical predicted protein
MGAL_10B076863	unassigned_transcript_172293	Hypothetical predicted protein
MGAL_10B076926	unassigned_transcript_70984	Hypothetical predicted protein
MGAL_10B077278	unassigned_transcript_209026	ATP-binding cassette, subfamily F, member 2
MGAL_10B077591	unassigned_transcript_127743	cyclin-dependent kinase 1
MGAL_10B077704	unassigned_transcript_162959	laminin, alpha 3/5 usherin
MGAL_10B078064	unassigned_transcript_71667	Hypothetical predicted protein
MGAL_10B079156	unassigned_transcript_66927	spectrin beta
MGAL_10B079776	unassigned_transcript_177857	laminin, gamma 1
MGAL_10B080306	unassigned_transcript_118941	carbonic anhydrase Hypothetical predicted protein
MGAL_10B080523	unassigned_transcript_142815	senataxin
MGAL_10B081579	unassigned_transcript_172700	Hypothetical predicted protein
MGAL_10B081829	unassigned_transcript_140921	Hypothetical predicted protein
MGAL_10B082434	unassigned_transcript_177088	agrin
MGAL_10B082698	unassigned_transcript_101216	Hypothetical predicted protein
MGAL_10B082784	unassigned_transcript_157081	Hypothetical predicted protein
MGAL_10B083572	unassigned_transcript_9913	Hypothetical predicted protein
MGAL_10B084019	unassigned_transcript_159148	lupus La protein
MGAL_10B084035	unassigned_transcript_145968	nucleolar protein 4
MGAL_10B084792	unassigned_transcript_65994	Hypothetical predicted protein
MGAL_10B084996	unassigned_transcript_198713	Hypothetical predicted protein
MGAL_10B086289	unassigned_transcript_166082	Hypothetical predicted protein
MGAL_10B086416	unassigned_transcript_106218	Hypothetical predicted protein
MGAL_10B087466	unassigned_transcript_82767	Hypothetical predicted protein
MGAL_10B088269	unassigned_transcript_160967	dynein heavy chain, axonemal
MGAL_10B088394	unassigned_transcript_41936	Hypothetical predicted protein
MGAL_10B088968	unassigned_transcript_120347	nesprin-1
MGAL_10B089237	unassigned_transcript_174769	heterogeneous nuclear ribonucleoprotein U-like protein 1
MGAL_10B089577	unassigned_transcript_85828	Hypothetical predicted protein
MGAL_10B089675	unassigned_transcript_132692	dynein heavy chain, axonemal
MGAL_10B090542	unassigned_transcript_125622	Hypothetical predicted protein
MGAL_10B090584	unassigned_transcript_53580	2-oxoglutarate dehydrogenase E1 component
MGAL_10B091078	unassigned_transcript_24950	Notch
MGAL_10B092103	unassigned_transcript_12443	dynein heavy chain 1, cytosolic
MGAL_10B092245B	unassigned_transcript_64439	Hypothetical predicted protein
MGAL_10B092537	unassigned_transcript_66916	Hypothetical predicted protein
MGAL_10B092854	unassigned_transcript_130386	transcription elongation factor B, polypeptide 3
MGAL_10B093120	unassigned_transcript_185400	Hypothetical predicted protein
MGAL_10B093391	unassigned_transcript_33935	cohesin loading factor subunit SCC2
MGAL_10B093480	unassigned_transcript_157646	chromodomain-helicase-DNA-binding protein 4
MGAL_10B093500	unassigned_transcript_209758	RNA polymerase-associated protein CTR9
MGAL_10B093541	unassigned_transcript_157650	Hypothetical predicted protein

## Sheet: Suppl. Table 8
Supplementary Table 8: Network metrics obtained by Cytoscape from the STRING-inferred protein-protein interactions across DE genes.
name	AverageShortestPathLength	BetweennessCentrality	ClosenessCentrality	ClusteringCoefficient	Degree	Eccentricity	NeighborhoodConnectivity	NumberOfUndirectedEdges	Radiality	Stress	TopologicalCoefficient
unassigned_transcript_100877	2.6	0	0.384615	0	1	4	2	1	0.466667	0	0
unassigned_transcript_177088	1.8	0.4	0.555556	0	2	3	2	2	0.733333	10	0.5
unassigned_transcript_1098	3.5	0	0.285714	0	1	6	3	1	0.166667	0	0
unassigned_transcript_173580	2.625	0.25	0.380952	0.333333	3	5	2	3	0.458333	14	0.555556
unassigned_transcript_118941	2.66667	0	0.375	0	1	4	4	1	0.666667	0	0
unassigned_transcript_169563	1.77778	0.583333	0.5625	0	4	3	1.75	4	0.844444	42	0.25
unassigned_transcript_127743	1.875	0.535714	0.533333	0	2	3	3.5	2	0.78125	30	0.5
unassigned_transcript_133535	1.75	0.607143	0.571429	0.333333	4	3	2.5	4	0.8125	36	0.45
unassigned_transcript_149039	2.25	0.464286	0.444444	0	3	4	1.33333	3	0.6875	26	0.333333
unassigned_transcript_130386	1.55556	0.555556	0.642857	0.5	4	2	3.75	4	0.888889	40	0.4375
unassigned_transcript_25690	2	0	0.5	1	3	3	4	3	0.8	0	0.666667
unassigned_transcript_209758	2	0	0.5	1	3	3	4	3	0.8	0	0.666667
unassigned_transcript_41936	1.77778	0.416667	0.5625	0.3	5	3	2.4	5	0.844444	30	0.5
unassigned_transcript_65378	2.5	0	0.4	1	2	4	3.5	2	0.625	0	0.875
unassigned_transcript_214395	2.25	0.25	0.444444	0.333333	3	4	2.66667	3	0.6875	16	0.583333
unassigned_transcript_33935	2.25	0.0357143	0.444444	0.666667	3	4	3	3	0.6875	4	0.6
unassigned_transcript_137371	2.66667	0	0.375	0	1	4	5	1	0.666667	0	0
unassigned_transcript_137669	1	0	1	0	1	1	1	1	1	0	0
unassigned_transcript_1440	1	0	1	0	1	1	1	1	1	0	0
unassigned_transcript_141835	1	0	1	1	2	1	2	2	1	0	1
unassigned_transcript_65569	1	0	1	1	2	1	2	2	1	0	1
unassigned_transcript_200360	1	0	1	1	2	1	2	2	1	0	1
unassigned_transcript_142061	1	1	1	0	2	1	1	2	1	2	0
unassigned_transcript_157650	1.5	0	0.666667	0	1	2	2	1	0.75	0	0
unassigned_transcript_197584	1.5	0	0.666667	0	1	2	2	1	0.75	0	0
unassigned_transcript_14428	1.5	0	0.666667	0	1	2	2	1	0.75	0	0
unassigned_transcript_82669	1	1	1	0	2	1	1	2	1	2	0
unassigned_transcript_146094	1.5	0	0.666667	0	1	2	2	1	0.75	0	0
unassigned_transcript_33840	3.125	0	0.32	0	1	5	3	1	0.46875	0	0
unassigned_transcript_192117	3.125	0	0.32	0	1	5	3	1	0.46875	0	0
unassigned_transcript_149258	3.125	0	0.32	0	1	5	3	1	0.46875	0	0
unassigned_transcript_151468	1.5	0	0.666667	0	1	2	2	1	0.75	0	0
unassigned_transcript_163555	1	1	1	0	2	1	1	2	1	2	0
unassigned_transcript_162959	1.6	0.15	0.625	0.666667	3	3	2.66667	3	0.8	6	0.666667
unassigned_transcript_77608	1.4	0.6	0.714286	0.333333	3	2	2.66667	3	0.866667	16	0.583333
unassigned_transcript_53395	2.2	0	0.454545	1	2	4	3	2	0.6	0	1
unassigned_transcript_177857	1.6	0.15	0.625	0.666667	3	3	2.66667	3	0.8	6	0.666667
unassigned_transcript_96400	1.5	0	0.666667	0	1	2	2	1	0.75	0	0
unassigned_transcript_209026	2.66667	0	0.375	0	1	4	4	1	0.666667	0	0
unassigned_transcript_36247	2.66667	0	0.375	0	1	4	4	1	0.666667	0	0
unassigned_transcript_172279	1	0	1	0	1	1	1	1	1	0	0
unassigned_transcript_24950	1	0	1	0	1	1	1	1	1	0	0
unassigned_transcript_174315	2.75	0	0.363636	1	2	5	3	2	0.416667	0	0.75
unassigned_transcript_91934	2.125	0.535714	0.470588	0.333333	3	4	2.33333	3	0.625	30	0.5
unassigned_transcript_174769	1	0	1	0	1	1	1	1	1	0	0
unassigned_transcript_56487	1	0	1	0	1	1	1	1	1	0	0
unassigned_transcript_176036	3	0	0.333333	0	1	5	3	1	0.333333	0	0
unassigned_transcript_6821	2.125	0.607143	0.470588	0	3	4	1.66667	3	0.625	34	0.333333
unassigned_transcript_176283	3.625	0	0.275862	0	1	6	2	1	0.125	0	0
unassigned_transcript_181406	2.75	0.25	0.363636	0	2	5	2	2	0.416667	14	0.5
unassigned_transcript_213861	1	1	1	0	2	1	1	2	1	2	0
unassigned_transcript_34468	1.5	0	0.666667	0	1	2	2	1	0.75	0	0
unassigned_transcript_53580	1.5	0	0.666667	0	1	2	2	1	0.75	0	0
unassigned_transcript_79571	2.66667	0	0.375	0	1	4	5	1	0.666667	0	0
unassigned_transcript_73450	2	0.571429	0.5	0	2	3	3	2	0.666667	32	0.5

## Sheet: Suppl. Table 9
Supplementary Table 9A: DE lncRNAs with significant hits against the MirGeneDB 3.0 database of metazoan miRNA
Type	Gene_ID	Hits (significant)	Evalue	Correlate with bias
Male-biased	MGAL_10B092209	Cmi-Novel-23_pre Cmi-Novel-12_pre	0.021 0.021	No
Male-biased	MGAL_10NCA015414	Neu-Mir-7385-o2_pre	00:36:00	No
Female-biased	MGAL_10NCA019234	Gsp-Mir-34_pre	00:47:00	Yes
Female-biased	MGAL_10NCA019758	Dma-Mir-96-P3_pre Gpa-Mir-1175_pre	0.001 0.018	No
Female-biased	MGAL_10NCA030066	Lpo-Mir-2-P1j_pre	00:39:00	No
Female-biased	MGAL_10NCA030167	Neu-Mir-190-P3_pre	00:03:00	No
Female-biased	MGAL_10NCA039225	Pab-Mir-430-P39_pre Mml-Mir-430-P39_pre Hsa-Mir-430-P39_pre	0.043 0.043 0.043	No
Male-biased	MGAL_10NCA039924	Dme-Mir-9388_pre	00:01:00	No
Male-biased	MGAL_10NCA047620	Oan-Mir-875_pre Dsi-Mir-985_pre	0.001 0.005	No
Female-biased	MGAL_10NCA056358	Xtr-Mir-202-P1_pre Xla-Mir-202-P3_pre Xtr-Mir-202-P2_pre Dma-Mir-96-P3_pre	0.0006 0.0006 0.028 0.028	No
Female-biased	MGAL_10NCA064528	Ami-Mir-737_pre	00:24:00	No
Supplementary Table 9B: DE lncRNAs with multiple hits/copies on genome that are significantly enriched for hits/copies within DE PCGs. Yellow rows are those significantly enriched also for PCGs included in the largest PPI-subnetwork we discussed. The columns Features, length, classification and notes reffer to the consensus sequence builded up with the top 20 hits against the genome plus 1000bp o…
Type	Gene_ID	Hits/copies in all PCGs	Hits/copies in DE PCGs	Hits/copies in PCGs of the largest PPI-subnetwork	PPI-subnetwork enrichment	Correlate with bias	Features	Length	Classification	Notes
female biased	MGAL_10NCA010048	595	18	3	Yes	No	No TIRs, Tandem-like structure; No TSDs	465	DNA/Kolobok	Strong homology to Medu KolobokP transpoons on Repbase (whole length alignment with identity > 90%)
female biased	MGAL_10NCA010049	1301	24	5	Yes	Yes	No TIRs, Tandem-like structure; No TSDs	2209	DNA/Kolobok	Strong homology to Medu KolobokP transpoons on Repbase (whole length alignment with identity > 90%)
female biased	MGAL_10NCA026304	3	1	0	No	No
female biased	MGAL_10NCA026562	3	1	0	No	No
male biased	MGAL_10NCA034218	1823	28	6	Yes	No	No TIRs, Tandem-like structure; No TSDs	06:47:00	DNA/Kolobok	Strong homology to Medu KolobokP transpoons on Repbase (whole length alignment with identity > 90%)
female biased	MGAL_10NCA052169	675	11	3	Yes	Yes	No structural features	352	DNA/Kolobok	??
female biased	MGAL_10NCA061360	1770	31	8	Yes	Yes	No TIRs, Tandem-like structure; No TSDs	2257	DNA/Kolobok	Strong homology to Medu KolobokP transpoons on Repbase (whole length alignment with identity > 90%)
male biased	MGAL_10NCA065232	1309	21	2	No	Yes	TTAA TSDs; 16bps TIRs	274	DNA/Kolobok	/
female biased	MGAL_10NCA066482	979	18	4	Yes	No	No TIRs, Tandem-like structure; No TSDs	1820	DNA/Kolobok	Strong homology to Medu KolobokP transpoons on Repbase (whole length alignment with identity > 90%)
male biased	MGAL_10NCA069327	1129	18	6	Yes	Yes	No TIRs, Tandem-like structure; No TSDs	133	DNA/Kolobok	Strong homology to Medu KolobokP transpoons on Repbase (whole length alignment with identity > 90%)

## Sheet: Suppl. Table 10
Supplementary Table 10: evolutionary analyses dataset
References crossed for building species tree used in evolutionary analyses (when species was not available, position of the belonging family was used): Lemer et al. 2019, Proceedings B, 286:20182684 (https://doi.org/10.1098/rspb.2018.2684) Lemer et al. 2016, Proceedings B, 283:20160857 (https://doi.org/10.1098/rspb.2016.0857) Combosh et al. 2018, Molecular Phylogenetics and Evolution, 107:191-208…
Subclass					Order	Family	Species	Species id	BUSCO (C - C+P)	CDS	Mitochondrial Inheritance	Genome/Transcriptome	Source
Autobranchia	Pteriomorphia				Arcoida	Arcidae	Anadara (Scapharca) broughtonii	Sbro	91 - 93	23085	SMI	Genome	GigaDB
							Tegillarca granosa	Tgra	91 - 99	22546	SMI	Transcriptome	Piccinini et al. 2021
					Pectinida	Pectinidae	Pecten maximus	Pmax	98 - 98	32409	SMI	Genome	GCF_902652985.1
							Mizuhopecten (Patinopecten) yessoensis	Pyes	98 - 99	30318	SMI	Genome	GCF_002113885.1
					Pterioida	Pinnidae	Atrina pectinata	Apec	98 - 99	23047	SMI	Transcriptome
						Pteriidae	Pinctada margaritifera	Pmar	97 - 99	20361	SMI	Transcriptome	Piccinini et al. 2021
					Ostreida	Ostreidae	Crassostrea gigas	Cgig	98 - 99	38259	SMI	Genome	GCF_902806645.1
							Saccostrea glomerata	Sglo	89 - 94	45837	SMI	Genome	dbSROG
					Mytilida	Mytilidae	Modiolus modiolus	Mmod	99 - 100	33747	DUI	Transcriptome
							Perumytilus purpuratus	Ppur	87 - 97	43272	DUI	Transcriptome
							Mytilus galloprovincialis	Mgal	80 - 89	53727	DUI	Genome	GCA_900618805.1
					Limoida	Limidae	Acesta excavata	Aexc	62 - 89	30254	SMI	Transcriptome
	Heteroconchia	Palaeotherodonta			Trigoniida	Trigoniidae	Neotrigonia margaritacea	Nmar	53 - 82	14065	SMI	Transcriptome	Piccinini et al. 2021
					Unionida	Margaritiferidae	Margaritifera margaritifera	Mmar	93 - 95	20567	DUI	Genome	FigShare
						Unionidae	Cristaria plicata	Cpli	98 - 99	18881	DUI	Transcriptome	Piccinini et al. 2021
							Potamilus streckersoni	Pstr	75 - 82	20417	DUI	Genome	OneDrive
		Heterodonta	Archiheterodonta		Carditida	Carditidae	Carditamera floridiana	Cflo	53 - 84	39172	SMI	Transcriptome
			Euheterondonta	Imparidentia	Lucinida	Lucinidae	Loripes orbiculatus	Lorb	81 - 93	28592	SMI	Transcriptome
					Galeommatida	Galeommatidae	Galeomma turtoni	Gtur	66 - 91	13253	SMI	Transcriptome	Piccinini et al. 2021
					Adapedonta	Solenidae	Solen grandis	Sgra	99 - 99	21321	DUI	Transcriptome
						Solenidae	Sinonovacula constricta	Scon	92 - 95	28594	SMI	Genome	GCA_007844125.1
						Hiatellidae	Panopea generosa	Pgen	90 - 98	22597	SMI	Transcriptome
					Cardida	Cardiidae	Tridacna squamosa	Tsqu	check	19594	SMI	Transcriptome
					Myida	Myidae	Mya arenaria	Mare	98 - 99	20114	SMI	Genome	GCF_026914265.1
						Dreissenidae	Dreissena polymorpha	Dpol	87 - 93	19891	SMI	Genome	MSI
					Venerida	Mactridae	Mactra chinensis	Mchi	91 - 98	17111	SMI	Transcriptome	Piccinini et al. 2021
						Sphaeriidae	Pisidium coreanum	Pcor	99 - 99	62056	SMI	Transcriptome
						Vesicomyidae	Archivesica (Calyptogena) marissinica	Amar	82 - 88	16453	SMI	Genome	GCA_014843695.1
							Phreagena okutanii	Poku	98 - 99	19631	SMI	Transcriptome
						Cyrenidae	Corbicula fluminea	Cflu	93 - 99	30538	SMI	Transcriptome	Piccinini et al. 2021
						Arcticidae	Arctica islandica	Aisl	48 - 78	12793	DUI	Transcriptome	Piccinini et al. 2021
						Trapezidae	Neotrapezium sublaevigatum	Nsub	42 - 77	22775	SMI	Transcriptome
						Veneridae	Ruditapes philippinarum	Rphi	83 - 91	28129	DUI	Genome	GCA_026571515.1
							Ruditapes decussatus	Rdec	92 - 98	16971	SMI	Transcriptome	Piccinini et al. 2021
							Mercenaria mercenaria	Mmer	95 - 96	37084	SMI	Genome	GCF_014805675.1
							Cyclina sinensis	Csin	94 - 95	27564	DUI	Genome	Dryad

[truncated: 12 more sheets: Suppl. Table 11, Suppl. Table 12, Suppl. Table 13, Suppl. Table 14, Suppl. Table 15, Suppl. Table 16, Suppl. Table 17, Suppl. Table 18, Suppl. Table 19, Suppl. Table 20, Suppl. Table 21, Suppl. Table 22]
